# Supplementary material
Source: HighWire-hosted journal article supplement (https://bmjopen.bmj.com/content/12/12/e046444)
Supplement: inline-supplementary-material-1 [file inline-supplementary-material-1.xlsx]

## Sheet: Client
weight	gender	age	age -categories	Number of people in the gousehold	number of children	employement status	education level	marital status	household income	profession (employees)	profession (self-employed)	size of the company	activity	experience in this job (month)	number of work hours per week	number of work hours per week -categories	work on Saturday or Sunday	night work	staggered hours	workplace	time spend in commuting (MINUTES)	time spend in commuting -categories (MINUTES)	remote work	unemployement period	Q28. Scoring (/84) DETAIL	PSRF.1	PSRF.2	PSRF.3	PSRF.4	PSRF.5	PSRF.6	PSRF.7	PSRF.8	PSRF.9	PSRF.10	PSRF.11	PSRF.12	PSRF.13	PSRF.14	PSRF.15	PSRF.16	PSRF.17	PSRF.18	PSRF.19	PSRF.20	PSRF.21	PSRF.22	PSRF.23	PSRF.24
0.954467	woman	46	45 to 59 years	3	1	full time	Bac + 3	married/free union	15 to 24.000 €	Technician and associate professional		100 to 499 people	Education, health and social work	48	35	Standard duration (Less than 39h)	never	never	often	Commercial permises	20	16 to 30 minutes	no	>4	22	disagree	fully disagree	agree	disagree	fully agree	agree	fully disagree	agree	agree	fully agree	fully disagree	fully disagree	fully agree	fully disagree	fully disagree	disagree	fully disagree	fully disagree	fully disagree	fully agree	fully agree	fully agree	agree	fully disagree
3.99966	woman	24	18 to 24 years	1	none	full time	Bac + 3	alone	under 15.000 €	Service and office worker		10 to 49 people	other services	26	35	Standard duration (Less than 39h)	rarely	never	never	Individual office	45	31 to 45 minutes	no	never	35	agree	fully agree	fully disagree	fully disagree	fully disagree	agree	agree	disagree	agree	fully agree	disagree	disagree	fully disagree	agree	fully agree	disagree	agree	agree	fully agree	disagree	disagree	fully disagree	agree	disagree
1.13874	man	48	45 to 59 years	1	none	full time	< baccalaureate degree	alone	15 to 24.000 €	Service and office worker		9 people or less	trading	5	42	Long duration (39 to 50h)	often	rarely	often	Commercial permises	20	16 to 30 minutes	no	2 to 4 periods	0	agree	agree	agree	fully agree	agree	agree	fully disagree	agree	agree	agree	agree	disagree	agree	disagree	disagree	agree	disagree	agree	agree	agree	agree	agree	agree	agree
0.737241	man	47	45 to 59 years	2	1	full time	Bac + 3	alone	Over 36.000 €	Senior managers		100 to 499 people	other services	254	35	Standard duration (Less than 39h)	often	rarely	often	Individual office	20	16 to 30 minutes	1 day per week	never	11	disagree	agree	fully agree	fully agree	fully agree	fully agree	fully disagree	fully agree	agree	agree	fully disagree	disagree	fully agree	fully disagree	fully disagree	agree	disagree	fully agree	agree	fully agree	fully agree	fully agree	fully agree	disagree
0.8391	man	36	35 to 44 years	1	none	full time	Bac + 2	alone	15 to 24.000 €	Technician and associate professional		10 to 49 people	other services	188	39	Long duration (39 to 50h)	never	never	never	Individual office	25	16 to 30 minutes	no	never	9	agree	disagree	disagree	agree	agree	disagree	disagree	disagree	disagree	agree	disagree	disagree	disagree	disagree	agree	disagree	disagree	disagree	disagree	disagree	disagree	disagree	agree	disagree
1.55113	man	49	45 to 59 years	2	none	full time	< baccalaureate degree	married/free union	15 to 24.000 €	Workers		9 people or less	other services	137	35	Standard duration (Less than 39h)	never	never	never	other	20	16 to 30 minutes	no	1 period	0	agree	fully agree	fully agree	fully agree	fully agree	agree	fully agree	fully agree	fully agree	agree	fully disagree	fully agree	fully agree	fully agree	agree	fully agree	fully agree	fully agree	fully agree	fully agree	fully agree	fully agree	agree	agree
0.901929	woman	48	45 to 59 years	1	none	full time	Baccalaureate degree	alone	under 15.000 €	Service and office worker		50 to 99 people	Education, health and social work	246	35	Standard duration (Less than 39h)	Very often	rarely	Very often	other	30	16 to 30 minutes	no	>4	16	agree	agree	disagree	disagree	agree	agree	fully disagree	disagree	agree	agree	agree	disagree	agree	disagree	disagree	agree	agree	agree	agree	agree	agree	disagree	disagree	agree
0.300209	man	46	45 to 59 years	5 and more	3	full time	Bac + 2	married/free union	Over 36.000 €	Senior managers		500 people or more	Education, health and social work	99	40	Long duration (39 to 50h)	rarely	never	never	Individual office	90	1h to 1h30	no	never	16	disagree	disagree	fully disagree	agree	agree	agree	disagree	agree	agree	agree	disagree	disagree	agree	agree	agree	agree	agree	agree	agree	agree	agree	disagree	agree	disagree
1.03244	man	59	45 to 59 years	1	none	self employed	< baccalaureate degree	alone	under 15.000 €		Craftsman, shopkeeper, entrepreneur		trading	41	30	Standard duration (Less than 39h)	often	never	rarely	at home	300	>1h30		2 to 4 periods	13	disagree	fully disagree		fully agree		agree		disagree	agree	fully agree	disagree	disagree	agree	agree	fully disagree		disagree	disagree	agree	agree	agree		disagree
2.85511	man	23	18 to 24 years	1	none	full time	Baccalaureate degree	alone	under 15.000 €	Senior managers		10 to 49 people	other services	24	40	Long duration (39 to 50h)	often	rarely	often	at customers	60	46 to 60 minutes	more than one day a week	>4	20	disagree	disagree	fully disagree	agree	disagree	agree	fully disagree	disagree	agree	fully agree	disagree	agree	agree	disagree	disagree	disagree	agree	agree	disagree	agree	agree	disagree	agree	fully disagree
1.09198	man	50	45 to 59 years	4	1	full time	Baccalaureate degree	married/free union	24 to 36.000 €	Workers		10 to 49 people	Transports	224	43	Long duration (39 to 50h)	rarely	rarely	Very often	at customers	90	1h to 1h30	1 day per week	never	0	agree	disagree	agree	disagree	agree	disagree	disagree	agree	fully disagree	agree	agree	disagree	agree	disagree	agree	disagree	agree	fully agree	agree	fully agree	agree	fully agree	agree	agree
0.991166	woman	47	45 to 59 years	2	1	full time	< baccalaureate degree	alone	24 to 36.000 €	Service and office worker		100 to 499 people	Education, health and social work	328	35	Standard duration (Less than 39h)	Very often	never	Very often	other	5	<15 minutes	no	never	26	disagree	agree	agree	agree	agree	agree	fully disagree	disagree	agree	agree	disagree	disagree	agree	disagree	disagree	agree	fully disagree	agree	agree	agree	agree	agree	disagree	disagree
0.396992	woman	39	35 to 44 years	4	2	full time	Baccalaureate degree	married/free union	24 to 36.000 €	Service and office worker		500 people or more	Education, health and social work	46	25	Standard duration (Less than 39h)	Very often	never	Very often	production or workshop	10	<15 minutes	no	2 to 4 periods	21	agree	agree	disagree	disagree	disagree	disagree	disagree	disagree	fully agree	agree	disagree	agree	disagree	disagree	agree	fully disagree	fully disagree	agree	disagree	disagree	agree	disagree	disagree	disagree
1.20417	man	62	60 years and more	2	none	part time	< baccalaureate degree	married/free union	24 to 36.000 €	Service and office worker		9 people or less	other services	36	10	Standard duration (Less than 39h)	rarely	never	rarely	external site	5	<15 minutes	no	1 period	18	agree	disagree	fully agree	fully disagree	disagree	fully agree	agree	disagree	fully agree	disagree	disagree	fully disagree	agree	agree	fully disagree	fully agree	fully disagree	fully agree	disagree	fully agree	agree	fully disagree	fully disagree	disagree
0.959755	woman	46	45 to 59 years	5 and more	1	part time	Bac + 2	married/free union	Over 36.000 €	Service and office worker		10 to 49 people	Education, health and social work	41	20	Standard duration (Less than 39h)	never	never	never	other	10	<15 minutes	no	2 to 4 periods	7	agree	agree	fully disagree	agree	disagree	disagree	disagree	disagree	agree	agree	fully disagree	agree	agree	agree	disagree	fully disagree	fully disagree	agree	agree	disagree	disagree	disagree	disagree	fully disagree
0.773111	man	46	45 to 59 years	2	none	full time	Baccalaureate degree	married/free union	Over 36.000 €	Service and office worker		500 people or more	Education, health and social work	264	37	Standard duration (Less than 39h)	never	never	never	open space	40	31 to 45 minutes	no	never	18	agree	disagree	disagree	fully disagree	disagree	agree	fully disagree	disagree	fully agree	agree	disagree	fully disagree	agree	agree	disagree	disagree	disagree	agree	disagree	disagree	agree	agree	fully disagree	disagree
1.03244	man	47	45 to 59 years	2	1	self employed	Bac + 2	alone	under 15.000 €		Craftsman, shopkeeper, entrepreneur		trading	52	40	Long duration (39 to 50h)	often	rarely	often	at home	60	46 to 60 minutes		2 to 4 periods	22	agree	disagree		agree		agree		agree	agree	agree	disagree	disagree	disagree	agree	disagree		fully disagree	disagree	agree	agree	agree		agree
0.30139	man	59	45 to 59 years	4	none	full time	< baccalaureate degree	married/free union	24 to 36.000 €	Technician and associate professional		500 people or more	Transports	10	38	Standard duration (Less than 39h)	never	never	rarely	open space	15	<15 minutes	no	never	14	disagree	agree	disagree	disagree	fully agree	fully agree	fully disagree	disagree	disagree	fully agree	disagree	fully disagree	disagree	disagree	fully disagree	fully agree	fully disagree	fully agree	disagree	disagree	disagree	disagree	agree	agree
1.00684	woman	36	35 to 44 years	5 and more	3	full time	Bac + 3	married/free union	Over 36.000 €	Senior managers		100 to 499 people	Industry	120	40	Long duration (39 to 50h)	never	never	never	open space	40	31 to 45 minutes	no	never	23	fully disagree	disagree	fully disagree	disagree	fully disagree	agree	disagree	fully agree	agree	fully agree	fully agree	disagree	fully disagree	disagree	fully disagree	agree	disagree	agree	disagree	agree	agree	agree	fully agree	disagree
1.84501	man	25	25 to 34 years	4	none	full time	< baccalaureate degree	alone	Over 36.000 €	Workers		9 people or less	building	6	40	Long duration (39 to 50h)	often	rarely	rarely	at customers	45	31 to 45 minutes	no	>4	0	disagree	agree	agree	agree	agree	agree	fully disagree	disagree	agree	disagree	disagree	disagree	agree	disagree	disagree	agree	disagree	agree	agree	agree	agree	agree	agree	disagree
0.783203	man	54	45 to 59 years	2	none	full time	Bac + 3	married/free union	24 to 36.000 €	Technician and associate professional		500 people or more	Education, health and social work	300	35	Standard duration (Less than 39h)	often	often	often	open space	20	16 to 30 minutes	a half day per week	never	67	agree	fully agree	fully disagree	fully disagree	fully disagree	fully disagree	agree	fully agree	fully disagree	fully agree	agree	fully agree	fully disagree	fully agree	fully agree	disagree	disagree	fully disagree	fully agree	disagree	fully disagree	disagree	fully agree	fully agree
1.0664	woman	39	35 to 44 years	4	2	full time	Bac + 3	married/free union	15 to 24.000 €	Senior managers		100 to 499 people	Education, health and social work	168	50	Long duration (39 to 50h)	often	rarely	often	at home	120	>1h30		never	55	disagree	agree	fully disagree	disagree	disagree	disagree	fully disagree	agree	disagree	fully agree	agree	fully agree	agree	agree	agree	agree	fully agree	disagree	disagree	agree	disagree	disagree	fully agree	disagree
0.82679	man	39	35 to 44 years	4	2	full time	Bac + 3	married/free union	Over 36.000 €	Senior managers		50 to 99 people	Education, health and social work	186	35	Standard duration (Less than 39h)	often	never	rarely	at home	5	<15 minutes		never	8	disagree	agree	agree	disagree	agree	agree	agree	disagree	fully agree	disagree	disagree	agree	disagree	disagree	disagree	agree	fully disagree	agree	disagree	agree	agree	agree	disagree	disagree
2.77081	man	22	18 to 24 years	4	none	full time	Bac + 2	married/free union	24 to 36.000 €	Technician and associate professional		10 to 49 people	other services	1	35	Standard duration (Less than 39h)	often	never	rarely	production or workshop	20	16 to 30 minutes	no	never	9	disagree	agree	agree	agree	agree	agree	disagree	disagree	fully agree	agree	disagree	disagree	fully agree	disagree	disagree	agree	disagree	agree	agree	agree	fully agree	agree	disagree	disagree
0.938449	woman	48	45 to 59 years	3	none	part time	Bac + 2	married/free union	Over 36.000 €	Service and office worker		100 to 499 people	Industry	204	30	Standard duration (Less than 39h)	never	never	rarely	Individual office	40	31 to 45 minutes	no	never	13	disagree	disagree	disagree	disagree	disagree	agree	disagree	disagree	agree	agree	disagree	disagree	agree	agree	disagree	agree	disagree	agree	disagree	agree	agree	disagree	agree	disagree
1.03244	man	50	45 to 59 years	2	none	self employed	Baccalaureate degree	alone	Over 36.000 €		Craftsman, shopkeeper, entrepreneur		trading	198	39	Long duration (39 to 50h)	Very often	never	often	external site	60	46 to 60 minutes	no	2 to 4 periods	15	disagree	fully disagree		fully agree		agree		disagree	agree	disagree	agree	disagree	agree	disagree	fully disagree		fully agree	disagree	fully disagree	agree	agree		agree
1.22221	man	37	35 to 44 years	4	2	full time	Baccalaureate degree	married/free union	Over 36.000 €	Senior managers		9 people or less	other services	30	40	Long duration (39 to 50h)	never	never	rarely	Individual office	20	16 to 30 minutes	no	never	0	agree	agree	agree	agree	agree	agree	agree	agree	agree	agree	agree	agree	agree	agree	disagree	agree	agree	agree	agree	agree	agree	agree	agree	agree
1.16166	man	37	35 to 44 years	5 and more	3	full time	Bac + 2	married/free union	Over 36.000 €	Workers		10 to 49 people	Industry	54	37	Standard duration (Less than 39h)	rarely	rarely	rarely	at customers	25	16 to 30 minutes	no	2 to 4 periods	14	disagree	agree	agree	agree	agree	agree	disagree	agree	agree	agree	agree	disagree	agree	disagree	disagree	agree	agree	fully agree	agree	agree	agree	agree	disagree	disagree
2.93923	man	23	18 to 24 years	5 and more	none	part time	Baccalaureate degree	alone	15 to 24.000 €	Service and office worker		100 to 499 people	other services	215	30	Standard duration (Less than 39h)	often	often	rarely	external site	45	31 to 45 minutes	no	2 to 4 periods	13	fully agree	agree	agree	agree	agree	agree	disagree	disagree	agree	agree	fully disagree	disagree	fully agree	disagree	fully disagree	agree	fully agree	agree	disagree	agree	agree	disagree	fully disagree	fully disagree
0.753222	man	46	45 to 59 years	2	none	full time	Bac + 3	alone	Over 36.000 €	Senior managers		500 people or more	Education, health and social work	63	45	Long duration (39 to 50h)	never	never	never	Individual office	20	16 to 30 minutes	no	never	20	disagree	agree	agree	disagree	disagree	disagree	fully disagree	fully agree	fully agree	agree	disagree	agree	fully agree	disagree	disagree	disagree	fully disagree	fully agree	fully agree	fully agree	agree	fully agree	agree	disagree
0.292462	man	47	45 to 59 years	4	1	full time	Baccalaureate degree	married/free union	Over 36.000 €	Technician and associate professional		500 people or more	Industry	180	39	Long duration (39 to 50h)	rarely	often	Very often	production or workshop	20	16 to 30 minutes	no	never	12	disagree	disagree	agree	agree	agree	agree	disagree	disagree	agree	disagree	disagree	fully disagree	agree	disagree	disagree	agree	disagree	agree	disagree	agree	agree	agree	agree	fully disagree
0.911562	woman	48	45 to 59 years	2	none	self employed	Baccalaureate degree	alone	24 to 36.000 €		Senior managers		trading	96	36	Standard duration (Less than 39h)	often	never	never	at home	0	<15 minutes		1 period	12	disagree	disagree		agree		agree		disagree	agree	agree	disagree	disagree	agree	disagree	disagree		disagree	disagree	disagree	agree	agree		disagree
0.719458	man	46	45 to 59 years	5 and more	2	full time	Bac + 2	married/free union	Over 36.000 €	Technician and associate professional		100 to 499 people	trading	243	44	Long duration (39 to 50h)	often	rarely	rarely	open space	7	<15 minutes	no	never	11	agree	agree	agree	agree	agree	agree	agree	agree	agree	agree	agree	agree	agree	agree	agree	agree	agree	agree	agree	agree	agree	agree	disagree	disagree
0.368226	man	35	35 to 44 years	3	1	full time	Bac + 2	En union libre	Over 36.000 €	Technician and associate professional		500 people or more	Industry	42	38	Standard duration (Less than 39h)	never	never	never	open space	90	1h to 1h30	1 day per week	1 period	16	agree	agree	agree	agree	agree	agree	agree	agree	agree	agree	agree	agree	agree	agree	agree	agree	agree	agree	agree	agree	agree	agree	agree	agree
0.896179	man	45	45 to 59 years	4	2	full time	Baccalaureate degree	married/free union	Over 36.000 €	Technician and associate professional		500 people or more	other services	58	40	Long duration (39 to 50h)	never	often	rarely	open space	150	>1h30	no	1 period	21	disagree	agree	disagree	disagree	disagree	disagree	disagree	agree	agree	fully agree	disagree	fully agree	agree	agree	disagree	agree	agree	fully agree	fully agree	agree	disagree	agree	fully agree	disagree
0.85306	man	43	35 to 44 years	2	none	full time	Baccalaureate degree	En union libre	Over 36.000 €	Service and office worker		10 to 49 people	Education, health and social work	144	35	Standard duration (Less than 39h)	rarely	never	rarely	open space	180	>1h30	no	1 period	34	disagree	disagree	disagree	agree	agree	agree	fully disagree	agree	agree	disagree	agree	disagree	agree	disagree	disagree	agree	fully agree	agree	agree	agree	disagree	agree	agree	disagree
0.85306	man	38	35 to 44 years	3	2	full time	Baccalaureate degree	alone	15 to 24.000 €	Service and office worker		10 to 49 people	Transports	207	40	Long duration (39 to 50h)	Very often	Very often	Very often	external site	25	16 to 30 minutes	no	1 period	8	disagree	agree	disagree	disagree	disagree	agree	fully disagree	agree	agree	agree	disagree	disagree	agree	disagree	disagree	disagree	disagree	agree	agree	agree	agree	agree	agree	agree
0.862572	man	26	25 to 34 years	2	none	full time	Bac + 3	En union libre	15 to 24.000 €	Service and office worker		50 to 99 people	trading	36	35	Standard duration (Less than 39h)	never	never	never	Individual office	30	16 to 30 minutes	no	never	17	disagree	disagree	agree	disagree	disagree	agree	disagree	agree	agree	disagree	agree	disagree	disagree	disagree	disagree	disagree	disagree	disagree	agree	agree	agree	disagree	agree	disagree
1.61337	woman	28	25 to 34 years	2	none	full time	Baccalaureate degree	En union libre	Over 36.000 €	Workers		10 to 49 people	Industry	96	35	Standard duration (Less than 39h)	never	never	never	other	40	31 to 45 minutes	no	never	22	fully disagree	disagree	disagree	fully disagree	disagree	agree	disagree	agree	agree	fully agree	agree	fully disagree	disagree	agree	fully disagree	disagree	disagree	agree	disagree	agree	disagree	disagree	disagree	disagree
0.449938	woman	50	45 to 59 years	3	2	full time	Bac + 3	alone	24 to 36.000 €	Technician and associate professional		500 people or more	other services	120	35	Standard duration (Less than 39h)	never	never	never	open space	70	1h to 1h30	no	never	19	agree	fully disagree	disagree	disagree	disagree	disagree	disagree	agree	agree	fully agree	disagree	disagree	disagree	agree	agree	disagree	agree	disagree	agree	disagree	disagree	fully disagree	agree	disagree
1.02243	man	36	35 to 44 years	3	1	full time	< baccalaureate degree	married/free union	24 to 36.000 €	Workers		100 to 499 people	Industry	53	35	Standard duration (Less than 39h)	rarely	often	often	production or workshop	20	16 to 30 minutes	no	never	2	agree	agree	agree	agree	fully agree	agree	agree	agree	agree	agree	agree	agree	agree	agree	agree	agree	agree	agree	agree	agree	agree	agree	agree	agree
0.900574	man	43	35 to 44 years	4	2	full time	Bac + 2	married/free union	Over 36.000 €	Technician and associate professional		100 to 499 people	Transports	120	40	Long duration (39 to 50h)	often	often	often	Individual office	0	<15 minutes	more than one day a week	never	16	disagree	agree	agree	agree	agree	agree	disagree	agree	agree	agree	agree	disagree	agree	agree	disagree	agree	disagree	agree	disagree	agree	agree	agree	agree	disagree
0.319477	man	35	35 to 44 years	2	1	full time	< baccalaureate degree	En union libre	15 to 24.000 €	Senior managers		500 people or more	trading	12	42	Long duration (39 to 50h)	never	never	never	external site	120	>1h30	no	2 to 4 periods	11	disagree	agree	agree	agree	agree	agree	disagree	disagree	agree	disagree	disagree	disagree	agree	disagree	disagree	agree	agree	agree	disagree	agree	agree	agree	agree	disagree
0.731789	man	47	45 to 59 years	5 and more	3	full time	< baccalaureate degree	married/free union	15 to 24.000 €	Service and office worker		100 to 499 people	trading	144	35	Standard duration (Less than 39h)	often	never	rarely	other	20	16 to 30 minutes	no	2 to 4 periods	14	fully agree	agree	agree	disagree	agree	agree	disagree	disagree	agree	fully agree	disagree	agree	agree	agree	agree	agree	disagree	agree	disagree	agree	agree	agree	disagree	disagree
0.377949	woman	46	45 to 59 years	2	none	full time	Bac + 3	married/free union	Over 36.000 €	Technician and associate professional		500 people or more	building	144	45	Long duration (39 to 50h)	never	never	never	Individual office	45	31 to 45 minutes	no	2 to 4 periods	22	disagree	fully disagree	fully disagree	disagree	disagree	fully agree	fully disagree	fully agree	agree	disagree	fully agree	disagree	fully agree	fully disagree	disagree	agree	fully agree	agree	agree	fully agree	fully agree	agree	fully agree	agree
0.77996	man	47	45 to 59 years	1	none	full time	Bac + 2	alone	15 to 24.000 €	Service and office worker		10 to 49 people	Insurance and real estate	122	35	Standard duration (Less than 39h)	Very often	never	rarely	Individual office	60	46 to 60 minutes	no	never	8	disagree	agree	agree	agree	agree	agree	fully disagree	disagree	agree	disagree	fully disagree	agree	agree	disagree	fully disagree	agree	fully disagree	agree	disagree	agree	agree	agree	disagree	disagree
0.358981	woman	64	60 years and more	5 and more	none	full time	Bac + 3	married/free union	24 to 36.000 €	Technician and associate professional		500 people or more	Education, health and social work	486	35	Standard duration (Less than 39h)	Very often	Very often	Very often	other	10	<15 minutes	no	never	8	fully disagree	agree	disagree	agree	fully agree	agree	agree	agree	fully agree	disagree	agree	agree	disagree	disagree	disagree	agree	fully disagree	agree	fully agree	fully agree	agree	disagree	fully agree	fully disagree
0.866085	woman	64	60 years and more	2	none	self employed	Bac + 3	married/free union	Over 36.000 €		Craftsman, shopkeeper, entrepreneur		other services	6	25	Standard duration (Less than 39h)	rarely	never	never	at home	60	46 to 60 minutes		never	11	fully disagree	fully disagree		fully agree		fully agree		disagree	fully agree	fully disagree	fully disagree	fully disagree	agree	fully disagree	fully disagree		disagree	agree	disagree	fully agree	fully agree		disagree
1.50489	man	46	45 to 59 years	3	1	part time	Baccalaureate degree	married/free union	24 to 36.000 €	Workers		9 people or less	Industry	241	35	Standard duration (Less than 39h)	Very often	Very often	Very often	other	30	16 to 30 minutes	no	never	17	agree	agree	agree	disagree	fully disagree	disagree	fully disagree	agree	agree	fully agree	agree	disagree	disagree	fully agree	disagree	agree	disagree	agree	fully agree	disagree	agree	disagree	fully agree	disagree
1.07971	man	38	35 to 44 years	4	2	full time	Baccalaureate degree	married/free union	Over 36.000 €	Workers		9 people or less	other services	2	35	Standard duration (Less than 39h)	rarely	rarely	often	production or workshop	20	16 to 30 minutes	no	1 period	8	disagree	fully agree	agree	agree	agree	agree	agree	fully agree	fully agree	agree	disagree	disagree	fully agree	agree	disagree	agree	disagree	fully agree	agree	agree	fully agree	agree	agree	disagree
1.84501	man	25	25 to 34 years	4	1	full time	Bac + 3	alone	Over 36.000 €	Workers		9 people or less	trading	27	50	Long duration (39 to 50h)	Very often	Very often	Very often	other	650	>1h30	a half day per week	never	6	fully disagree	agree	disagree	disagree	agree	agree	agree	agree	disagree	fully agree	disagree	disagree	agree	agree	fully disagree	agree	agree	fully disagree	fully disagree	agree	fully agree	disagree	agree	disagree
0.476634	woman	43	35 to 44 years	4	2	part time	Bac + 2	married/free union	Over 36.000 €	Senior managers		500 people or more	Insurance and real estate	2	24	Standard duration (Less than 39h)	never	never	rarely	flex office	90	1h to 1h30	1 day per week	never	46	agree	disagree	fully disagree	fully disagree	disagree	disagree	fully agree	agree	agree	fully agree	agree	disagree	disagree	agree	disagree	disagree	disagree	disagree	agree	disagree	agree	fully disagree	agree	agree
1.4745	woman	49	45 to 59 years	2	1	full time	Bac + 2	alone	24 to 36.000 €	Senior managers		9 people or less	other services	300	35	Standard duration (Less than 39h)	Very often	rarely	Very often	open space	60	46 to 60 minutes	no	never	12	fully disagree	disagree	agree	fully agree	fully agree	fully agree	fully disagree	fully agree	agree	agree	agree	disagree	fully agree	fully disagree	fully disagree	fully agree	disagree	agree	fully agree	fully agree	agree	agree	agree	fully disagree
0.888155	man	34	25 to 34 years	3	1	full time	Bac + 3	En union libre	Over 36.000 €	Technician and associate professional		100 to 499 people	Industry	128	35	Standard duration (Less than 39h)	Very often	Very often	Very often	production or workshop	60	46 to 60 minutes	no	never	15	agree	agree	disagree	agree	disagree	agree	disagree	agree	agree	fully agree	agree	disagree	agree	agree	disagree	agree	disagree	agree	agree	agree	agree	agree	agree	disagree
1.01575	man	31	25 to 34 years	4	2	full time	Baccalaureate degree	married/free union	Over 36.000 €	Technician and associate professional		100 to 499 people	other services	6	40	Long duration (39 to 50h)	rarely	rarely	never	open space	50	46 to 60 minutes	no	1 period	9	agree	disagree	disagree	disagree	fully disagree	agree	agree	agree	disagree	fully agree	agree	fully disagree	disagree	fully agree	fully disagree	agree	disagree	agree	agree	disagree	agree	disagree	agree	agree
1.01256	woman	39	35 to 44 years	3	2	full time	Bac + 3	alone	24 to 36.000 €	Technician and associate professional		100 to 499 people	Education, health and social work	96	35	Standard duration (Less than 39h)	rarely	never	rarely	Individual office	32	31 to 45 minutes	no	never	23	disagree	disagree	agree	fully agree	agree	fully agree	fully disagree	agree	agree	disagree	agree	fully disagree	agree	disagree	disagree	fully agree	fully disagree	agree	disagree	fully agree	disagree	agree	disagree	agree
0.866085	woman	60	60 years and more	2	none	self employed	Baccalaureate degree	alone	24 to 36.000 €		Craftsman, shopkeeper, entrepreneur		Insurance and real estate	6	16	Standard duration (Less than 39h)	rarely	never	rarely	Individual office	150	>1h30	a half day per week	never	7	agree	disagree		disagree		disagree		agree	agree	fully agree	agree	disagree	disagree	agree	fully agree		fully agree	disagree	agree	disagree	agree		agree
0.47094	man	48	45 to 59 years	1	none	full time	Baccalaureate degree	alone	24 to 36.000 €	Workers		500 people or more	other services	204	35	Standard duration (Less than 39h)	rarely	often	often	other	90	1h to 1h30	no	never	10	disagree	fully disagree	disagree	disagree	disagree	fully agree	fully disagree	disagree	fully agree	disagree	disagree	disagree	agree	fully disagree	fully disagree	agree	disagree	agree	agree	fully agree	disagree	agree	agree	disagree
0.906193	woman	50	45 to 59 years	1	none	self employed	< baccalaureate degree	alone	24 to 36.000 €		Senior managers	9 people or less	other services	314	24	Standard duration (Less than 39h)	Very often	Very often	Very often	other	90	1h to 1h30	no	never	14	fully disagree	fully disagree		fully agree		fully agree		fully disagree	fully agree	disagree	fully disagree	fully disagree	fully agree	fully disagree	fully disagree		fully disagree	fully agree	fully disagree	fully agree	fully agree		agree
1.00802	woman	52	45 to 59 years	4	none	full time	Bac + 3	married/free union		Technician and associate professional		500 people or more	Education, health and social work	186	35	Standard duration (Less than 39h)	rarely	never	rarely	other	1	<15 minutes	more than one day a week	1 period	7	fully agree	agree	disagree	fully disagree	disagree	agree	disagree	disagree	agree	agree	agree	disagree	disagree	agree	disagree	agree	fully disagree	disagree	disagree	disagree	disagree	disagree	agree	agree
1.00802	woman	49	45 to 59 years	1	none	full time	Bac + 2	alone	24 to 36.000 €	Technician and associate professional		500 people or more	Education, health and social work	308	35	Standard duration (Less than 39h)	often	often	often	other	10	<15 minutes	no	never	16	disagree	agree	disagree	disagree	agree	disagree	disagree	agree	agree	disagree	agree	fully agree	agree	disagree	disagree	agree	fully disagree	agree	fully agree	agree	agree	agree	agree	disagree
0.744832	woman	36	35 to 44 years	3	1	self employed	Bac + 3	married/free union	24 to 36.000 €		Senior managers		Education, health and social work	96	30	Standard duration (Less than 39h)	often	rarely	rarely	at customers	20	16 to 30 minutes	a half day per week	1 period	23	disagree	agree		fully agree		agree		disagree	agree	fully agree	disagree	disagree	fully agree	agree	disagree		disagree	agree	disagree	fully agree	agree		agree
0.829253	man	44	35 to 44 years	3	1	full time	Bac + 2	married/free union	Over 36.000 €	Technician and associate professional		500 people or more	other services	251	40	Long duration (39 to 50h)	Very often	rarely	Very often	other	45	31 to 45 minutes	no	never	28	fully agree	agree	disagree	agree	disagree	fully disagree	disagree	fully agree	agree	agree	agree	fully agree	fully disagree	disagree	disagree	fully disagree	disagree	agree	agree	disagree	fully disagree	agree	agree	fully agree
1.01495	man	38	35 to 44 years	4	2	full time	< baccalaureate degree	En union libre	15 to 24.000 €	Workers		50 to 99 people	building	144	35	Standard duration (Less than 39h)	never	never	often	external site	30	16 to 30 minutes	no	never	28	fully disagree	fully agree	agree	fully disagree	disagree	disagree	fully disagree	agree	fully agree	fully agree	disagree	agree	fully agree	agree	agree	fully agree	disagree	fully agree	agree	agree	agree	agree	fully agree	disagree
3.48827	woman	24	18 to 24 years	2	none	full time	Bac + 3	married/free union		Technician and associate professional		10 to 49 people	Industry	24	38	Standard duration (Less than 39h)	never	never	never	open space	90	1h to 1h30	no	never	22	disagree	agree	agree	disagree	agree	fully agree	fully disagree	disagree	fully agree	fully agree	fully disagree	disagree	agree	disagree	disagree	fully agree	fully disagree	fully agree	agree	agree	fully agree	disagree	fully agree	fully disagree
0.905311	man	32	25 to 34 years	4	2	full time	Bac + 3	married/free union	24 to 36.000 €	Technician and associate professional		50 to 99 people	Education, health and social work	81	35	Standard duration (Less than 39h)	never	never	never	other	35	31 to 45 minutes	no	never	17	disagree	disagree	fully agree	agree	disagree	agree	agree	agree	agree	agree	agree	disagree	agree	disagree	disagree	agree	fully disagree	agree	agree	agree	fully agree	agree	disagree	disagree
1.18409	man	37	35 to 44 years	4	2	full time	Bac + 3	married/free union	Over 36.000 €	Senior managers		9 people or less	Transports	64	40	Long duration (39 to 50h)	often	Very often	often	open space	425	>1h30	1 day per week	>4	62	agree	agree	disagree	agree	fully agree	fully agree	fully agree	agree	agree	fully agree	agree	fully agree	fully agree	fully agree	agree	agree	fully agree	fully agree	agree	agree	fully agree	fully agree	fully agree	agree
0.983032	man	48	45 to 59 years	1	none	full time	Baccalaureate degree	alone	under 15.000 €	Workers		50 to 99 people	Industry	240	39	Long duration (39 to 50h)	often	Very often	often	other	310	>1h30	a half day per week	never	19	agree	fully agree	agree	fully agree	fully agree	agree	fully agree	fully agree	fully agree	fully agree	agree	fully agree	fully agree	fully agree	fully agree	agree	agree	agree	agree	agree	agree	agree	agree	fully agree
1.01288	man	34	25 to 34 years	2	1	full time	Bac + 3	alone	Over 36.000 €	Senior managers		100 to 499 people	other services	32	39	Long duration (39 to 50h)	never	never	never	open space	60	46 to 60 minutes	no	1 period	7	disagree	disagree	agree	agree	disagree	agree	disagree	disagree	agree	agree	agree	disagree	agree	disagree	disagree	disagree	disagree	agree	agree	agree	agree	disagree	agree	disagree
1.06929	woman	37	35 to 44 years	1	none	full time	Bac + 3	alone	15 to 24.000 €	Technician and associate professional		500 people or more	Education, health and social work	30	40	Long duration (39 to 50h)	rarely	never	never	Individual office	25	16 to 30 minutes	no	never	4	disagree	disagree	disagree	agree	agree	agree	agree	agree	agree	disagree	agree	disagree	disagree	agree	agree	agree	disagree	agree	disagree	agree	agree	disagree	disagree	disagree
0.783932	man	49	45 to 59 years	2	none	full time	Bac + 2	alone	15 to 24.000 €	Senior managers		10 to 49 people	other services	81	35	Standard duration (Less than 39h)	rarely	never	rarely	Individual office	15	<15 minutes	no	never	22	disagree	agree	agree	disagree	disagree	agree	agree	agree	agree	agree	agree	disagree	disagree	agree	agree	disagree	disagree	agree	agree	agree	agree	disagree	agree	agree
0.718699	man	42	35 to 44 years	1	none	self employed	< baccalaureate degree	alone	under 15.000 €		Craftsman, shopkeeper, entrepreneur	9 people or less	other services	120	50	Long duration (39 to 50h)	rarely	rarely	rarely	at home	0	<15 minutes		>4	24	agree	agree		agree		disagree		fully disagree	agree	disagree	disagree	fully disagree	agree	disagree	agree		fully disagree	fully disagree	disagree	agree	agree		disagree
0.755593	man	48	45 to 59 years	3	1	full time	Bac + 2	married/free union	Over 36.000 €	Technician and associate professional		500 people or more	Education, health and social work	22	45	Long duration (39 to 50h)	often	often	often	Individual office	10	<15 minutes	no	never	15	agree	agree	agree	agree	agree	agree	agree	agree	agree	agree	agree	agree	agree	agree	agree	agree	agree	agree	agree	agree	agree	agree	agree	agree
1.30276	man	33	25 to 34 years	3	1	full time	< baccalaureate degree	En union libre	under 15.000 €	Workers		10 to 49 people	other services	72	39	Long duration (39 to 50h)	rarely	rarely	rarely	external site	45	31 to 45 minutes	a half day per week	2 to 4 periods	5	agree	agree	disagree	disagree	fully disagree	agree	agree	agree	agree	fully agree	disagree	agree	agree	fully agree	agree	agree	agree	agree	disagree	disagree	disagree	fully disagree	disagree	fully agree
1.43258	woman	48	45 to 59 years	4	2	full time	Bac + 2	married/free union		Technician and associate professional		9 people or less	Education, health and social work	372	35	Standard duration (Less than 39h)	often	never	never	Commercial permises	75	1h to 1h30	no	never	9	disagree	agree	disagree	agree	agree	agree	agree	disagree	agree	disagree	disagree	fully agree	agree	disagree	agree	agree	disagree	agree	fully agree	agree	agree	agree	disagree	disagree
1.63729	man	36	35 to 44 years	3	1	full time	< baccalaureate degree	married/free union	15 to 24.000 €	Workers		9 people or less	Industry	31	40	Long duration (39 to 50h)	Very often	often	often	other	480	>1h30	a half day per week	2 to 4 periods	51	agree	fully agree	disagree	disagree	disagree	disagree	disagree	fully agree	disagree	agree	fully agree	fully agree	disagree	agree	agree	agree	fully agree	disagree	fully agree	disagree	fully disagree	agree	fully agree	fully agree
2.25503	woman	49	45 to 59 years	1	none	full time	Bac + 2	alone	15 to 24.000 €	Workers		9 people or less	other services	216	39	Long duration (39 to 50h)	rarely	never	never	Individual office	90	1h to 1h30	no	never	16	disagree	disagree	disagree	disagree	disagree	disagree	disagree	disagree	disagree	disagree	disagree	disagree	disagree	disagree	disagree	disagree	disagree	disagree	disagree	disagree	disagree	disagree	disagree	disagree
0.972964	woman	50	45 to 59 years	5 and more	2	full time	Bac + 3	married/free union	24 to 36.000 €	Technician and associate professional		500 people or more	Education, health and social work	180	42	Long duration (39 to 50h)	never	never	rarely	open space	30	16 to 30 minutes	no	1 period	15	disagree	agree	disagree	agree	agree	agree	disagree	agree	agree	agree	agree	agree	agree	agree	disagree	disagree	agree	disagree	disagree	agree	agree	disagree	agree	agree
0.866085	woman	64	60 years and more	2	none	self employed	Bac + 3	married/free union			Craftsman, shopkeeper, entrepreneur		trading	125	4	Standard duration (Less than 39h)	never	never	never	at home	0	<15 minutes		never	34	fully disagree	fully disagree		fully agree		fully agree		fully disagree	fully agree	fully agree	disagree	disagree	disagree	disagree	fully disagree		fully disagree	fully disagree	disagree	agree	agree		fully disagree
0.828893	man	41	35 to 44 years	5 and more	3	full time	Bac + 3	married/free union	Over 36.000 €	Senior managers		100 to 499 people	other services	164	39	Long duration (39 to 50h)	rarely	rarely	rarely	open space	20	16 to 30 minutes	no	never	0	disagree	disagree	disagree	disagree	disagree	disagree	disagree	disagree	disagree	disagree	disagree	disagree	disagree	disagree	disagree	disagree	disagree	disagree	disagree	disagree	disagree	disagree	disagree	disagree
0.771008	man	48	45 to 59 years	4	none	full time	Bac + 2	married/free union	15 to 24.000 €	Service and office worker		9 people or less	other services	300	50	Long duration (39 to 50h)	Very often	Very often	Very often	other	0	<15 minutes	no	never	9	disagree	fully agree	agree	agree	fully agree	fully agree	disagree	agree	fully agree	fully agree	agree	fully agree	agree	agree	disagree	fully agree	disagree	fully agree	fully agree	agree	fully agree	agree	fully agree	disagree
1.05919	man	38	35 to 44 years	2	none	full time	Bac + 3	En union libre	under 15.000 €	Workers		100 to 499 people	Industry	110	35	Standard duration (Less than 39h)	often	rarely	Very often	production or workshop	30	16 to 30 minutes	no	2 to 4 periods	11	agree	fully disagree	agree	fully disagree	agree	agree	fully disagree	fully disagree	agree	disagree	fully disagree	disagree	agree	fully disagree	disagree	disagree	disagree	agree	disagree	agree	fully agree	agree	fully disagree	agree
0.750194	man	48	45 to 59 years	4	2	full time	Bac + 3	married/free union	Over 36.000 €	Service and office worker		500 people or more	Education, health and social work	173	39	Long duration (39 to 50h)	rarely	never	rarely	production or workshop	60	46 to 60 minutes	no	1 period	17	fully disagree	disagree	disagree	disagree	disagree	disagree	disagree	agree	agree	disagree	agree	agree	disagree	fully agree	agree	fully disagree	disagree	disagree	agree	agree	disagree	disagree	fully agree	disagree
1.49506	woman	39	35 to 44 years	3	none	full time	Baccalaureate degree	alone	24 to 36.000 €	Service and office worker		9 people or less	Education, health and social work	216	37	Standard duration (Less than 39h)	Very often	never	never	Commercial permises	10	<15 minutes	a half day per week	never	8	disagree	agree	agree	agree	agree	fully agree	fully disagree	agree	agree	disagree	agree	agree	agree	fully disagree	fully disagree	agree	fully disagree	agree	fully agree	fully agree	fully agree	agree	agree	disagree
0.539528	woman	34	25 to 34 years	2	none	full time	Bac + 3	En union libre	Over 36.000 €	Senior managers		500 people or more	Insurance and real estate	6	40	Long duration (39 to 50h)	never	never	never	open space	55	46 to 60 minutes	no	never	18	fully disagree	agree	disagree	disagree	disagree	agree	disagree	disagree	agree	agree	disagree	disagree	agree	disagree	agree	disagree	agree	agree	fully disagree	disagree	agree	fully disagree	disagree	disagree
0.307736	man	39	35 to 44 years	2	none	full time	Bac + 2	married/free union	24 to 36.000 €	Senior managers		500 people or more	Education, health and social work	24	39	Long duration (39 to 50h)	rarely	rarely	rarely	open space	50	46 to 60 minutes	1 day per week	never	67	disagree	disagree	agree	agree	disagree	agree	fully disagree	agree	agree	disagree	agree	disagree	agree	disagree	disagree	agree	disagree	disagree	agree	agree	agree	agree	agree	disagree
1.78994	man	25	25 to 34 years	4	none	full time	< baccalaureate degree	alone	Over 36.000 €	Workers		9 people or less	Industry	24	35	Standard duration (Less than 39h)	never	never	never	production or workshop	15	<15 minutes	no	2 to 4 periods	7	agree	fully agree	fully disagree	fully disagree	disagree	disagree	agree	agree	agree	fully agree	agree	disagree	disagree	agree	agree	disagree	disagree	disagree	fully agree	disagree	disagree	disagree	agree	agree
1.14151	woman	44	35 to 44 years	5 and more	4 and more	full time	Baccalaureate degree	married/free union	24 to 36.000 €	Service and office worker		100 to 499 people	Education, health and social work	0	50	Long duration (39 to 50h)	Very often	Very often	Very often	other	0	<15 minutes	no	never	9	disagree	agree	agree	agree	agree	fully agree	disagree	fully disagree	agree	agree	disagree	disagree	agree	disagree	fully disagree	agree	fully disagree	agree	agree	agree	agree	fully disagree	disagree	fully disagree
1.04474	man	48	45 to 59 years	4	2	self employed	Bac + 3	En union libre	Over 36.000 €		Senior managers		other services	240	45	Long duration (39 to 50h)	Very often	never	often	at customers	60	46 to 60 minutes	more than one day a week	2 to 4 periods	14	fully disagree	disagree		fully agree		fully agree		disagree	fully agree	agree	agree	fully disagree	fully agree	fully disagree	disagree		disagree	agree	disagree	fully agree	agree		agree
1.09543	man	56	45 to 59 years	2	none	part time	Bac + 3	En union libre	under 15.000 €	Workers		10 to 49 people	Transports	231	26	Standard duration (Less than 39h)	never	never	often	other	20	16 to 30 minutes	no	never	31	agree	fully agree	fully disagree	fully disagree	fully disagree	disagree	agree	fully disagree	agree	disagree	disagree	disagree	fully disagree	agree	fully agree	fully disagree	fully agree	disagree	fully agree	disagree	agree	fully disagree	agree	disagree
1.79339	woman	35	35 to 44 years	4	2	full time	Bac + 2	En union libre	24 to 36.000 €	Technician and associate professional		9 people or less	Education, health and social work	139	36	Standard duration (Less than 39h)	Very often	never	never	other	30	16 to 30 minutes	no	never	31	agree	agree	disagree	fully disagree	disagree	agree	disagree	disagree	agree	agree	agree	agree	disagree	disagree	disagree	disagree	disagree	agree	fully agree	agree	disagree	fully disagree	agree	fully agree
0.853512	woman	61	60 years and more	2	none	full time	Baccalaureate degree	married/free union	24 to 36.000 €	Service and office worker		50 to 99 people	Industry	190	35	Standard duration (Less than 39h)	never	never	rarely	Commercial permises	35	31 to 45 minutes	no	1 period	11	disagree	agree	agree	agree	agree	agree	disagree	disagree	agree	agree	disagree	disagree	agree	disagree	disagree	agree	disagree	agree	disagree	disagree	agree	agree	agree	disagree
0.926735	woman	48	45 to 59 years	4	2	full time	Bac + 2	married/free union	24 to 36.000 €	Service and office worker		50 to 99 people	Insurance and real estate	222	35	Standard duration (Less than 39h)	rarely	never	never	flex office	105	>1h30	no	never	44	agree	agree	fully disagree	fully disagree	disagree	disagree	disagree	agree	agree	disagree	fully agree	agree	fully disagree	agree	agree	fully disagree	disagree	fully disagree	agree	disagree	disagree	fully disagree	agree	agree
1.0289	woman	50	45 to 59 years	4	1	full time	Bac + 2	married/free union		Service and office worker		10 to 49 people	Transports	68	100	Very Long duration (More than50h)	never	never	rarely	at home	0	<15 minutes		2 to 4 periods	42	disagree	agree	agree	disagree	disagree	fully agree	disagree	disagree	fully agree	fully agree	fully agree	fully agree	disagree	agree	disagree	disagree	fully disagree	agree	disagree	agree	agree	disagree	disagree	disagree
1.01601	woman	57	45 to 59 years	3	none	full time	Bac + 3	married/free union	Over 36.000 €	Technician and associate professional		10 to 49 people	Education, health and social work	216	30	Standard duration (Less than 39h)	never	never	never	other	45	31 to 45 minutes	no	never	10	disagree	agree	agree	disagree	agree	agree	fully disagree	disagree	fully agree	disagree	disagree	agree	agree	disagree	disagree	agree	disagree	agree	agree	agree	agree	agree	agree	disagree
0.629957	woman	48	45 to 59 years	4	2	self employed	< baccalaureate degree	married/free union	15 to 24.000 €		Craftsman, shopkeeper, entrepreneur	9 people or less	trading	19	5	Standard duration (Less than 39h)	Very often	never	often	external site	5	<15 minutes	no	never	14	agree	agree		fully agree		fully agree		disagree	fully agree	agree	disagree	fully disagree	fully agree	fully disagree	fully disagree		fully disagree	fully disagree	disagree	agree	agree		fully disagree
1.38389	man	37	35 to 44 years	2	none	full time	Baccalaureate degree	En union libre	15 to 24.000 €	Service and office worker		9 people or less	trading	144	40	Long duration (39 to 50h)	Very often	never	rarely	Commercial permises	45	31 to 45 minutes	no	1 period	43	disagree	agree	disagree	disagree	disagree	agree	fully disagree	agree	agree	fully agree	disagree	disagree	agree	disagree	agree	fully agree	agree	agree	disagree	agree	disagree	fully disagree	agree	disagree
0.775767	man	48	45 to 59 years	1	none	full time	< baccalaureate degree	alone	under 15.000 €	Service and office worker		10 to 49 people	other services	7	35	Standard duration (Less than 39h)	never	never	rarely	other	360	>1h30	more than one day a week	2 to 4 periods	8	disagree	agree	agree	disagree	agree	agree	disagree	agree	agree	agree	disagree	agree	agree	agree	disagree	agree	agree	agree	agree	agree	agree	disagree	agree	disagree
1.08734	man	23	18 to 24 years	1	none	full time	Bac + 3	alone	15 to 24.000 €	Senior managers		500 people or more	Education, health and social work	3	35	Standard duration (Less than 39h)	never	never	never	Individual office	40	31 to 45 minutes	no	never	14	agree	fully disagree	agree	agree	fully agree	disagree	agree	disagree	fully agree	disagree	agree	fully disagree	agree	agree	agree	agree	fully disagree	fully disagree	disagree	agree	agree	agree	agree	agree
0.837505	man	46	45 to 59 years	1	none	full time	Baccalaureate degree	alone		Service and office worker		100 to 499 people	other services	40	35	Standard duration (Less than 39h)	Very often	never	often	other	15	<15 minutes	no	1 period	7	disagree	disagree	agree	agree	agree	agree	fully disagree	disagree	fully agree	fully disagree	disagree	agree	fully agree	disagree	disagree	agree	fully disagree	disagree	fully disagree	agree	fully agree	agree	agree	fully disagree
1.03237	woman	50	45 to 59 years	3	none	full time	Bac + 2	alone	15 to 24.000 €	Service and office worker		10 to 49 people	trading	119	35	Standard duration (Less than 39h)	never	never	never	other	20	16 to 30 minutes	no	1 period	4	agree	agree	fully disagree	fully disagree	fully disagree	agree	agree	agree	disagree	agree	fully agree	fully agree	fully disagree	fully agree	fully agree	fully disagree	fully disagree	fully disagree	fully agree	agree	agree	fully disagree	agree	agree
0.896179	man	59	45 to 59 years	1	none	full time	< baccalaureate degree	married/free union	Over 36.000 €	Technician and associate professional		500 people or more	other services	36	40	Long duration (39 to 50h)	never	never	never	open space	120	>1h30	1 day per week	never	0	disagree	agree	agree	agree	agree	agree	fully disagree	disagree	agree	fully disagree	agree	fully disagree	agree	disagree	fully disagree	agree	agree	agree	agree	agree	agree	agree	disagree	agree
1.54987	man	34	25 to 34 years	4	2	self employed	Bac + 2	En union libre	Over 36.000 €		Craftsman, shopkeeper, entrepreneur	10 to 49 people	Industry	126	60	Very Long duration (More than50h)	rarely	rarely	often	Individual office	15	<15 minutes	no	never	20	fully agree	agree		agree		agree		fully agree	fully agree	disagree	agree	agree	agree	agree	fully agree		agree	agree	fully agree	agree	fully agree		agree
1.568	woman	38	35 to 44 years	4	2	full time	Bac + 3	married/free union	Over 36.000 €	Senior managers		9 people or less	Education, health and social work	97	40	Long duration (39 to 50h)	rarely	never	never	open space	45	31 to 45 minutes	a half day per week	2 to 4 periods	47	disagree	fully agree	fully disagree	disagree	disagree	agree	fully disagree	fully agree	agree	fully agree	fully agree	disagree	agree	disagree	agree	disagree	agree	fully disagree	agree	agree	agree	fully disagree	agree	agree
0.914488	woman	56	45 to 59 years	4	2	full time	Bac + 2	En union libre	Over 36.000 €	Technician and associate professional		50 to 99 people	other services	270	38	Standard duration (Less than 39h)	never	never	never	Individual office	40	31 to 45 minutes	no	2 to 4 periods	40	disagree	fully agree	disagree	disagree	disagree	agree	disagree	fully agree	agree	agree	fully agree	disagree	agree	agree	disagree	agree	fully disagree	agree	agree	agree	agree	agree	agree	fully agree
1.72974	woman	29	25 to 34 years	1	none	full time	Bac + 3	alone	15 to 24.000 €	Service and office worker		9 people or less	other services	48	40	Long duration (39 to 50h)	often	rarely	often	Individual office	15	<15 minutes	no	never	6	disagree	disagree	disagree	disagree	disagree	disagree	agree	agree	agree	disagree	disagree	disagree	disagree	disagree	agree	agree	fully disagree	agree	agree	disagree	agree	disagree	agree	disagree
1.34125	man	29	25 to 34 years	3	1	full time	Baccalaureate degree	alone	24 to 36.000 €	Technician and associate professional		9 people or less	Education, health and social work	96	45	Long duration (39 to 50h)	Very often	Very often	Very often	at customers	500	>1h30	1 day per week	never	11	agree	agree	agree	agree	fully agree	fully agree	fully agree	agree	agree	agree	disagree	agree	fully agree	fully agree	agree	fully agree	agree	agree	disagree	agree	agree	agree	agree	disagree
0.972964	woman	54	45 to 59 years	1	none	full time	Bac + 2	alone	24 to 36.000 €	Technician and associate professional		9 people or less	Education, health and social work	240	35	Standard duration (Less than 39h)	rarely	never	rarely	Individual office	40	31 to 45 minutes	no	never	50	fully agree	fully agree	fully disagree	fully disagree	fully disagree	fully disagree	fully agree	fully disagree	fully agree	fully disagree	disagree	fully disagree	fully disagree	agree	fully agree	fully disagree	fully disagree	fully disagree	fully disagree	fully disagree	agree	fully disagree	fully disagree	fully disagree
0.739079	man	46	45 to 59 years	4	2	full time	Bac + 2	En union libre		Senior managers		100 to 499 people	Industry	240	40	Long duration (39 to 50h)	rarely	never	never	Individual office	15	<15 minutes	no	never	16	disagree	disagree	agree	agree	agree	agree	disagree	agree	agree	disagree	fully agree	agree	agree	disagree	disagree	agree	fully disagree	agree	disagree	fully agree	agree	agree	agree	disagree
1.2053	woman	35	35 to 44 years	4	2	full time	< baccalaureate degree	married/free union	24 to 36.000 €	Service and office worker		500 people or more	other services	122	39	Long duration (39 to 50h)	rarely	never	never	open space	70	1h to 1h30	no	never	10	agree	agree	agree	disagree	agree	disagree	disagree	disagree	disagree	agree	disagree	agree	disagree	disagree	agree	agree	agree	agree	disagree	disagree	agree	agree	disagree	disagree
1.15181	woman	29	25 to 34 years	3	1	full time	Baccalaureate degree	married/free union	24 to 36.000 €	Service and office worker		100 to 499 people	Education, health and social work	96	35	Standard duration (Less than 39h)	Very often	Very often	Very often	at customers	10	<15 minutes	no	1 period	6	disagree	agree	agree	fully disagree	disagree	disagree	fully disagree	agree	agree	disagree	agree	agree	disagree	disagree	agree	disagree	fully disagree	agree	fully agree	agree	fully disagree	fully disagree	disagree	agree
1.43588	woman	43	35 to 44 years	2	none	full time	< baccalaureate degree	married/free union		Workers		10 to 49 people	building	360	8	Standard duration (Less than 39h)	never	never	never	at customers	80	1h to 1h30	no	never	0	fully disagree	fully disagree	fully disagree	fully disagree	fully disagree	fully disagree	fully disagree	fully disagree	fully disagree	fully disagree	fully disagree	fully disagree	fully disagree	fully disagree	fully disagree	fully disagree	fully disagree	fully disagree	fully disagree	fully disagree	fully disagree	fully disagree	fully disagree	fully disagree
0.959755	woman	59	45 to 59 years	2	none	full time	< baccalaureate degree	alone	15 to 24.000 €	Service and office worker		500 people or more	Education, health and social work	493	35	Standard duration (Less than 39h)	never	never	never	open space	20	16 to 30 minutes	no	never	17	disagree	agree	disagree	disagree	disagree	agree	fully disagree	disagree	fully agree	disagree	disagree	disagree	disagree	disagree	disagree	disagree	fully disagree	agree	disagree	agree	agree	agree	disagree	fully disagree
0.412614	man	28	25 to 34 years	3	1	full time	Baccalaureate degree	En union libre	24 to 36.000 €	Service and office worker		500 people or more	Industry	12	35	Standard duration (Less than 39h)	rarely	never	rarely	open space	15	<15 minutes	no	2 to 4 periods	20	fully agree	fully agree	agree	disagree	agree	agree	disagree	disagree	agree	fully agree	agree	disagree	fully agree	disagree	disagree	agree	disagree	disagree	agree	disagree	agree	agree	disagree	disagree
0.86475	man	43	35 to 44 years	4	2	full time	Bac + 3	married/free union	Over 36.000 €	Technician and associate professional		10 to 49 people	other services	116	37	Standard duration (Less than 39h)	never	never	never	Individual office	70	1h to 1h30	no	1 period	33	disagree	agree	agree	agree	disagree	agree	fully disagree	disagree	fully agree	fully agree	fully disagree	fully disagree	agree	disagree	disagree	agree	fully disagree	agree	disagree	agree	agree	disagree	agree	disagree
3.58281	woman	24	18 to 24 years	1	none	full time	Bac + 3	alone	15 to 24.000 €	Senior managers		10 to 49 people	Industry	1	35	Standard duration (Less than 39h)	never	never	never	Individual office	0	<15 minutes	no	2 to 4 periods	16	agree	agree	agree	agree	agree	fully agree	fully disagree	disagree	fully agree	disagree	fully disagree	fully disagree	fully agree	fully disagree	fully disagree	fully agree	fully disagree	fully agree	agree	agree	fully agree	agree	fully disagree	fully disagree
0.969391	man	30	25 to 34 years	3	1	full time	Bac + 3	married/free union	Over 36.000 €	Senior managers		10 to 49 people	other services	84	39	Long duration (39 to 50h)	never	never	never	open space	30	16 to 30 minutes	no	never	13	fully disagree	fully agree	agree	agree	fully agree	fully agree	fully disagree	agree	fully agree	agree	agree	fully disagree	fully agree	disagree	fully disagree	agree	fully disagree	agree	agree	agree	fully agree	agree	agree	disagree
0.403197	woman	38	35 to 44 years	3	1	full time	Bac + 3	married/free union	Over 36.000 €	Senior managers		500 people or more	other services	120	39	Long duration (39 to 50h)	never	never	never	open space	60	46 to 60 minutes	no	1 period	0	disagree	disagree	disagree	fully disagree	disagree	agree	disagree	disagree	agree	agree	disagree	fully disagree	agree	agree	fully disagree	agree	disagree	agree	disagree	agree	agree	fully disagree	disagree	disagree
1.0232	woman	39	35 to 44 years	4	2	part time	Bac + 2	married/free union	24 to 36.000 €	Service and office worker		500 people or more	other services	148	35	Standard duration (Less than 39h)	never	never	never	Individual office	35	31 to 45 minutes	no	never	8	agree	agree	agree	disagree	agree	fully disagree	fully disagree	agree	agree	agree	agree	agree	agree	disagree	agree	agree	disagree	disagree	disagree	agree	disagree	agree	agree	agree
0.85306	man	36	35 to 44 years	3	1	full time	Baccalaureate degree	married/free union	24 to 36.000 €	Service and office worker		10 to 49 people	trading	89	35	Standard duration (Less than 39h)	Very often	never	rarely	Commercial permises	150	>1h30	no	1 period	15	fully agree	agree	fully disagree	fully disagree	disagree	fully disagree	agree	fully agree	fully agree	disagree	fully agree	fully agree	disagree	agree	agree	fully disagree	agree	fully disagree	fully agree	disagree	fully disagree	agree	agree	agree
0.44447	woman	59	45 to 59 years	3	none	full time	< baccalaureate degree	married/free union	Over 36.000 €	Service and office worker		500 people or more	Insurance and real estate	485	37	Standard duration (Less than 39h)	never	never	never	Individual office	180	>1h30	no	never	18	fully agree	agree	fully disagree	fully disagree	fully disagree	disagree	agree	fully disagree	disagree	fully disagree	fully disagree	agree	fully disagree	agree	fully agree	fully disagree	fully agree	fully disagree	agree	fully disagree	agree	fully disagree	disagree	fully disagree
0.941397	woman	51	45 to 59 years	3	none	full time	< baccalaureate degree	married/free union		Service and office worker		100 to 499 people	trading	24	38	Standard duration (Less than 39h)	often	never	often	Commercial permises	20	16 to 30 minutes	no	2 to 4 periods	4	agree	fully agree	fully disagree	agree	disagree	disagree	disagree	disagree	disagree	disagree	agree	agree	disagree	agree	disagree	agree	fully disagree	agree	agree	agree	disagree	fully disagree	agree	agree
0.41607	man	31	25 to 34 years	2	none	full time	Bac + 3	En union libre	Over 36.000 €	Senior managers		500 people or more	Industry	23	40	Long duration (39 to 50h)	never	never	never	open space	25	16 to 30 minutes	no	never	6	disagree	disagree	agree	disagree	disagree	disagree	agree	agree	disagree	agree	agree	disagree	disagree	disagree	agree	agree	disagree	disagree	disagree	fully agree	agree	agree	agree	fully agree
1.00684	woman	38	35 to 44 years	4	2	full time	Bac + 3	married/free union	Over 36.000 €	Senior managers		100 to 499 people	other services	122	39	Long duration (39 to 50h)	never	never	never	Individual office	30	16 to 30 minutes	no	never	17	disagree	disagree	agree	disagree	agree	disagree	disagree	fully disagree	disagree	agree	disagree	fully disagree	agree	disagree	disagree	agree	fully disagree	fully disagree	agree	disagree	fully agree	agree	agree	disagree
0.959755	woman	51	45 to 59 years	5 and more	1	full time	Bac + 2	married/free union	Over 36.000 €	Service and office worker		500 people or more	other services	46	45	Long duration (39 to 50h)	Very often	Very often	Very often	Individual office	601	>1h30	no	1 period	11	agree	fully agree	fully disagree	fully disagree	fully disagree	disagree	agree	agree	agree	fully agree	fully agree	agree	disagree	agree	fully agree	fully disagree	disagree	disagree	fully agree	disagree	disagree	disagree	agree	agree
0.828893	man	43	35 to 44 years	1	none	full time	Bac + 2	alone	Over 36.000 €	Senior managers		500 people or more	other services	170	39	Long duration (39 to 50h)	never	never	never	Individual office	10	<15 minutes	no	2 to 4 periods	16	disagree	agree	disagree	agree	agree	agree	fully agree	agree	agree	agree	disagree	disagree	agree	disagree	agree	disagree	disagree	agree	agree	agree	agree	disagree	agree	agree
0.773111	man	53	45 to 59 years	4	2	full time	Baccalaureate degree	married/free union	15 to 24.000 €	Service and office worker		50 to 99 people	other services	240	38	Standard duration (Less than 39h)	never	never	never	open space	20	16 to 30 minutes	no	2 to 4 periods	12	agree	fully agree	agree	agree	agree	fully agree	fully disagree	agree	fully agree	fully agree	disagree	agree	agree	disagree	fully agree	fully agree	disagree	fully agree	fully agree	agree	fully agree	agree	agree	disagree
0.893426	man	47	45 to 59 years	2	none	full time	Bac + 3	married/free union	Over 36.000 €	Senior managers		500 people or more	other services	168	45	Long duration (39 to 50h)	never	never	Very often	Individual office	90	1h to 1h30	1 day per week	1 period	14	agree	fully agree	fully disagree	disagree	fully disagree	disagree	disagree	fully agree	fully agree	fully agree	fully agree	fully agree	agree	agree	fully agree	fully disagree	fully agree	fully disagree	agree	agree	disagree	fully disagree	fully agree	fully agree
0.634502	woman	55	45 to 59 years	2	none	self employed	Bac + 2	alone	under 15.000 €		Craftsman, shopkeeper, entrepreneur		trading	65	35	Standard duration (Less than 39h)	rarely	never	never	at home	315	>1h30		never	21	disagree	disagree		agree		disagree		agree	disagree	agree	disagree	agree	agree	agree	disagree		disagree	disagree	agree	agree	disagree		disagree
1.13752	man	34	25 to 34 years	4	2	full time	Bac + 3	married/free union	Over 36.000 €	Workers		50 to 99 people	Industry	96	35	Standard duration (Less than 39h)	never	never	never	open space	30	16 to 30 minutes	no	2 to 4 periods	21	agree	agree	disagree	agree	agree	agree	disagree	agree	agree	agree	agree	disagree	agree	agree	disagree	disagree	disagree	agree	agree	agree	agree	disagree	agree	disagree
1.15653	man	54	45 to 59 years	2	none	full time	Bac + 2	En union libre	Over 36.000 €	Senior managers		9 people or less	trading	26	50	Long duration (39 to 50h)	Very often	rarely	often	at home	45	31 to 45 minutes		1 period	1	fully agree	fully agree	fully agree	fully agree	fully agree	fully agree	fully agree	fully agree	fully agree	fully agree	fully agree	fully agree	fully agree	fully agree	fully agree	fully agree	fully agree	fully agree	fully agree	fully agree	fully agree	fully agree	fully agree	fully agree
0.932187	man	54	45 to 59 years	3	none	full time	< baccalaureate degree	married/free union	Over 36.000 €	Technician and associate professional		10 to 49 people	Industry	36	50	Long duration (39 to 50h)	often	rarely	rarely	Individual office	180	>1h30	a half day per week	1 period	11	fully disagree	fully agree	fully agree	fully agree	fully agree	agree	fully disagree	agree	agree	disagree	agree	agree	fully agree	disagree	fully agree	agree	agree	agree	agree	fully agree	fully agree	agree	agree	fully disagree
0.579486	woman	41	35 to 44 years	4	2	self employed	Bac + 3	married/free union			Technician and associate professional Service and office worker Workers	9 people or less	Education, health and social work	60	35	Standard duration (Less than 39h)	never	never	never	at home	0	<15 minutes		1 period	10	fully disagree	fully agree		fully disagree		disagree		disagree	agree	fully agree	fully disagree	fully disagree	agree	fully disagree	fully disagree		fully disagree	fully disagree	fully agree	agree	fully agree		agree
0.739479	man	50	45 to 59 years	2	none	full time	Bac + 2	married/free union	24 to 36.000 €	Technician and associate professional		100 to 499 people	building	18	40	Long duration (39 to 50h)	never	never	rarely	Individual office	30	16 to 30 minutes	no	>4	12	fully disagree	disagree	disagree	agree	agree	fully agree	fully disagree	disagree	agree	agree	disagree	disagree	agree	disagree	fully disagree	agree	fully disagree	fully agree	agree	fully agree	agree	disagree	agree	disagree
1.40272	woman	46	45 to 59 years	5 and more	3	full time	< baccalaureate degree	En union libre	under 15.000 €	Workers		10 to 49 people	Industry	77	39	Long duration (39 to 50h)	often	never	rarely	production or workshop	5	<15 minutes	no	1 period	17	agree	fully agree	disagree	agree	agree	agree	disagree	disagree	agree	fully agree	fully disagree	disagree	disagree	fully agree	disagree	disagree	fully disagree	agree	agree	agree	disagree	agree	agree	disagree
1.70819	woman	33	25 to 34 years	3	1	full time	Bac + 3	married/free union	Over 36.000 €	Senior managers		9 people or less	trading	94	35	Standard duration (Less than 39h)	Very often	rarely	never	Commercial permises	30	16 to 30 minutes	no	never	20	agree	disagree	agree	disagree	disagree	agree	disagree	agree	agree	agree	agree	disagree	disagree	disagree	disagree	agree	disagree	agree	agree	agree	agree	disagree	agree	disagree
0.995552	man	50	45 to 59 years	4	2	full time	Baccalaureate degree	En union libre	15 to 24.000 €	Workers		100 to 499 people	other services	2	32	Standard duration (Less than 39h)	never	never	never	at customers	15	<15 minutes	no	2 to 4 periods	24	agree	agree	fully disagree	disagree	agree	agree	fully disagree	disagree	fully agree	fully agree	agree	disagree	agree	agree	disagree	agree	disagree	agree	fully agree	agree	fully agree	fully disagree	fully disagree	disagree
1.07263	man	30	25 to 34 years	3	1	full time	Bac + 3	married/free union	Over 36.000 €	Technician and associate professional		10 to 49 people	Education, health and social work	51	44	Long duration (39 to 50h)	Very often	Very often	Very often	at home	10	<15 minutes		1 period	62	disagree	fully agree	fully disagree	fully disagree	fully disagree	disagree	fully disagree	fully agree	fully disagree	fully agree	fully agree	fully agree	fully disagree	fully agree	disagree	fully disagree	fully disagree	fully disagree	fully agree	fully agree	fully agree	fully disagree	fully agree	fully agree
1.16274	woman	31	25 to 34 years	4	2	full time	Bac + 3	married/free union	Over 36.000 €	Technician and associate professional		500 people or more	Education, health and social work	120	38	Standard duration (Less than 39h)	rarely	never	rarely	open space	180	>1h30	no	never	17	fully disagree	agree	disagree	agree	agree	agree	agree	agree	agree	fully agree	agree	disagree	agree	disagree	disagree	agree	fully agree	agree	disagree	agree	agree	agree	agree	disagree
0.834929	man	51	45 to 59 years	2	none	full time	Bac + 2	married/free union		Senior managers		50 to 99 people	Industry	13	39	Long duration (39 to 50h)	never	never	rarely	open space	90	1h to 1h30	no	2 to 4 periods	39	fully disagree	agree	fully disagree	disagree	disagree	fully disagree	fully disagree	fully agree	disagree	fully agree	fully agree	fully agree	agree	agree	agree	disagree	fully agree	disagree	agree	agree	disagree	disagree	agree	agree
1.33659	woman	42	35 to 44 years	3	2	full time	Bac + 2	alone	15 to 24.000 €	Workers		50 to 99 people	other services	228	38	Standard duration (Less than 39h)	Very often	never	rarely	production or workshop	25	16 to 30 minutes	no	never	73	fully agree	fully agree	fully disagree	fully disagree	fully disagree	fully disagree	disagree	fully agree	fully disagree	fully agree	fully agree	fully agree	agree	fully disagree	fully agree	fully disagree	disagree	fully disagree	fully agree	fully disagree	fully disagree	fully agree	fully agree	fully disagree
0.449938	woman	51	45 to 59 years	2	none	full time	Bac + 2	alone	24 to 36.000 €	Technician and associate professional		500 people or more	trading	118	38	Standard duration (Less than 39h)	never	never	never	open space	50	46 to 60 minutes	no	1 period	12	fully disagree	fully disagree	agree	fully disagree	disagree	agree	fully disagree	fully agree	fully agree	disagree	disagree	fully disagree	agree	fully disagree	fully disagree	agree	fully disagree	agree	fully agree	agree	fully agree	disagree	disagree	disagree
1.83215	woman	49	45 to 59 years	5 and more	2	self employed	Bac + 2	En union libre			Farmers		other services	305	45	Long duration (39 to 50h)	Very often	never	Very often	external site	5	<15 minutes	no	never	9	disagree	disagree		fully agree		fully agree		agree	agree	agree	fully agree	disagree	fully agree	disagree	disagree		fully disagree	agree	fully agree	fully agree	fully agree		agree
1.15235	woman	46	45 to 59 years	3	2	full time	Bac + 3	alone	24 to 36.000 €	Technician and associate professional		10 to 49 people	Education, health and social work	149	26	Standard duration (Less than 39h)	never	never	never	other	10	<15 minutes	no	never	13	fully disagree	fully disagree	disagree	agree	disagree	agree	fully disagree	disagree	agree	fully disagree	disagree	disagree	agree	agree	disagree	fully disagree	fully disagree	agree	disagree	agree	disagree	disagree	disagree	agree
1.67838	woman	29	25 to 34 years	2	1	part time	Bac + 2	En union libre	under 15.000 €	Service and office worker		9 people or less	Education, health and social work	48	22	Standard duration (Less than 39h)	never	never	never	other	3	<15 minutes	no	2 to 4 periods	38	disagree	agree	fully agree	agree	fully agree	fully agree	fully disagree	disagree	agree	fully agree	disagree	fully disagree	fully agree	fully disagree	fully disagree	fully agree	fully disagree	fully agree	disagree	fully agree	fully agree	disagree	agree	fully disagree
0.729932	man	54	45 to 59 years	4	2	full time	Bac + 2	married/free union	Over 36.000 €	Technician and associate professional		50 to 99 people	Education, health and social work	144	35	Standard duration (Less than 39h)	rarely	never	never	Individual office	30	16 to 30 minutes	no	never	8	fully disagree	disagree	disagree	disagree	disagree	disagree	disagree	disagree	agree	disagree	disagree	disagree	agree	disagree	disagree	disagree	disagree	disagree	disagree	agree	agree	agree	agree	disagree
0.417581	man	33	25 to 34 years	4	2	full time	Bac + 2	married/free union		Technician and associate professional		500 people or more	Industry	12	37	Standard duration (Less than 39h)	rarely	never	never	open space	45	31 to 45 minutes	no	1 period	0	fully agree	fully disagree	fully disagree	disagree	disagree	agree	disagree	disagree	fully agree	fully disagree	agree	fully agree	agree	disagree	agree	fully agree	agree	agree	agree	fully disagree	agree	disagree	fully agree	agree
0.316431	man	42	35 to 44 years	5 and more	3	full time	Bac + 2	married/free union	24 to 36.000 €	Service and office worker		500 people or more	Education, health and social work	74	35	Standard duration (Less than 39h)	rarely	never	never	Individual office	80	1h to 1h30	no	1 period	6	agree	disagree	agree	disagree	fully agree	fully agree	agree	disagree	fully agree	fully agree	fully disagree	fully disagree	agree	disagree	fully disagree	fully agree	fully agree	agree	fully disagree	agree	fully agree	fully agree	fully disagree	fully disagree
0.862256	man	51	45 to 59 years	3	1	self employed	Bac + 3	En union libre	Over 36.000 €		Craftsman, shopkeeper, entrepreneur		other services	135	65	Very Long duration (More than50h)	Very often	often	Very often	Individual office	30	16 to 30 minutes	1 day per week	never	20	disagree	agree		fully agree		fully agree		fully agree	disagree	fully agree	fully agree	agree	agree	fully agree	disagree		disagree	agree	fully agree	disagree	agree		disagree
0.883168	man	27	25 to 34 years	3	1	full time	Bac + 3	married/free union	Over 36.000 €	Senior managers		100 to 499 people	other services	2	40	Long duration (39 to 50h)	rarely	never	rarely	at customers	50	46 to 60 minutes	a half day per week	never	11	fully disagree	agree	agree	agree	agree	agree	fully disagree	agree	agree	agree	fully agree	fully disagree	agree	fully agree	fully disagree	agree	agree	fully agree	agree	agree	agree	agree	agree	disagree
0.99857	woman	43	35 to 44 years	4	2	part time	Bac + 3	En union libre	under 15.000 €	Service and office worker		100 to 499 people	Education, health and social work	144	15	Standard duration (Less than 39h)	Very often	never	never	at customers	30	16 to 30 minutes	no	2 to 4 periods	20	disagree	fully disagree	disagree	fully disagree	disagree	agree	fully disagree	agree	agree	fully agree	fully disagree	disagree	agree	agree	disagree	agree	disagree	disagree	fully disagree	disagree	agree	fully disagree	agree	fully disagree
0.975521	woman	45	45 to 59 years	4	2	full time	Bac + 2	married/free union	24 to 36.000 €	Senior managers		50 to 99 people	Education, health and social work	120	35	Standard duration (Less than 39h)	never	never	often	Individual office	30	16 to 30 minutes	no	never	19	agree	fully agree	disagree	agree	agree	agree	disagree	disagree	agree	disagree	agree	agree	agree	disagree	disagree	disagree	fully disagree	agree	disagree	agree	disagree	agree	disagree	disagree
1.03237	woman	56	45 to 59 years	1	none	full time	< baccalaureate degree	alone	under 15.000 €	Service and office worker		10 to 49 people	other services	51	40	Long duration (39 to 50h)	Very often	never	often	at customers	10	<15 minutes	no	>4	6	disagree	agree	fully agree	disagree	agree	disagree	fully disagree	disagree	disagree	fully disagree	agree	disagree	agree	disagree	disagree	fully agree	fully agree	agree	agree	fully agree	disagree	agree	agree	disagree
0.893426	man	58	45 to 59 years	2	none	full time	Bac + 3	married/free union	Over 36.000 €	Senior managers		10 to 49 people	other services	480	35	Standard duration (Less than 39h)	never	never	never	Individual office	20	16 to 30 minutes	no	never	17	disagree	disagree	agree	disagree	disagree	disagree	disagree	agree	disagree	agree	disagree	fully disagree	agree	disagree	disagree	agree	fully disagree	agree	disagree	agree	agree	disagree	disagree	disagree
0.971915	man	28	25 to 34 years	3	1	full time	Bac + 3	married/free union	24 to 36.000 €	Technician and associate professional		10 to 49 people	Industry	12	35	Standard duration (Less than 39h)	never	never	often	Individual office	60	46 to 60 minutes	no	never	27	disagree	fully agree	disagree	agree	disagree	agree	disagree	agree	agree	disagree	fully agree	agree	agree	fully agree	disagree	agree	agree	agree	agree	agree	agree	agree	agree	agree
1.32116	man	30	25 to 34 years	2	1	full time	< baccalaureate degree	alone	under 15.000 €	Service and office worker		9 people or less	other services	2	35	Standard duration (Less than 39h)	never	never	never	Commercial permises	30	16 to 30 minutes	no	1 period	4	agree	agree	agree	disagree	agree	agree	disagree	agree	fully agree	disagree	disagree	disagree	agree	disagree	disagree	agree	disagree	disagree	agree	fully agree	agree	agree	disagree	disagree
0.854627	man	32	25 to 34 years	1	none	full time	Bac + 3	alone	24 to 36.000 €	Senior managers		100 to 499 people	Industry	76	39	Long duration (39 to 50h)	rarely	rarely	rarely	open space	20	16 to 30 minutes	no	1 period	14	disagree	agree	disagree	disagree	agree	agree	fully disagree	agree	disagree	fully agree	disagree	disagree	agree	disagree	fully disagree	agree	disagree	agree	agree	agree	agree	fully disagree	agree	agree
0.745917	man	45	45 to 59 years	3	1	full time	Baccalaureate degree	married/free union	15 to 24.000 €	Service and office worker		10 to 49 people	Transports	216	42	Long duration (39 to 50h)	Very often	never	never	external site	20	16 to 30 minutes	no	never	20	fully agree	fully agree	disagree	fully disagree	fully disagree	disagree	disagree	agree	disagree	fully agree	fully agree	agree	fully disagree	agree	fully agree	fully disagree	disagree	disagree	fully agree	agree	disagree	disagree	agree	fully agree
0.358774	man	31	25 to 34 years	5 and more	3	full time	Bac + 2	married/free union	15 to 24.000 €	Service and office worker		500 people or more	Industry	13	39	Long duration (39 to 50h)	never	rarely	never	open space	20	16 to 30 minutes	no	2 to 4 periods	24	fully disagree	agree	agree	agree	agree	agree	fully agree	agree	agree	disagree	disagree	fully disagree	agree	disagree	fully disagree	agree	disagree	agree	agree	agree	fully agree	agree	agree	disagree
0.320713	man	42	35 to 44 years	4	2	full time	Bac + 2	married/free union	15 to 24.000 €	Technician and associate professional		500 people or more	other services	4	35	Standard duration (Less than 39h)	rarely	never	Very often	open space	60	46 to 60 minutes	no	never	0	agree	disagree	agree	disagree	agree	agree	agree	agree	agree	agree	agree	agree	agree	agree	agree	agree	agree	agree	agree	agree	agree	agree	agree	agree
0.755593	man	54	45 to 59 years	3	none	full time	Baccalaureate degree	married/free union	Over 36.000 €	Technician and associate professional		500 people or more	Education, health and social work	113	38	Standard duration (Less than 39h)	rarely	never	rarely	Individual office	20	16 to 30 minutes	no	never	18	fully disagree	disagree	disagree	agree	agree	agree	disagree	agree	agree	disagree	agree	fully disagree	agree	disagree	disagree	agree	fully disagree	agree	disagree	agree	agree	disagree	agree	fully disagree
0.925467	man	31	25 to 34 years	3	none	part time	< baccalaureate degree	alone		Service and office worker		100 to 499 people	other services	40	26	Standard duration (Less than 39h)	often	never	never	other	5	<15 minutes	no	2 to 4 periods	0	agree	disagree	disagree	disagree	agree	agree	disagree	disagree	agree	agree	disagree	disagree	agree	disagree	disagree	agree	fully disagree	agree	disagree	fully agree	agree	disagree	disagree	disagree
1.05603	man	36	35 to 44 years	1	none	part time	< baccalaureate degree	alone	15 to 24.000 €	Workers		100 to 499 people	Transports	48	25	Standard duration (Less than 39h)	never	often	often	other	15	<15 minutes	no	>4	46	disagree	fully agree	fully agree	disagree	fully agree	fully agree	fully agree	fully agree	disagree	fully agree	disagree	fully agree	fully agree	disagree	fully agree	fully agree	fully disagree	fully agree	fully agree	fully agree	agree	disagree	fully agree	fully agree
0.262901	man	62	60 years and more	3	none	full time	Bac + 2	married/free union	Over 36.000 €	Service and office worker		500 people or more	Industry	94	38	Standard duration (Less than 39h)	never	never	rarely	other	120	>1h30	no	1 period	18	disagree	agree	disagree	disagree	agree	disagree	fully disagree	agree	agree	fully disagree	agree	disagree	agree	agree	disagree	agree	agree	agree	fully agree	agree	agree	disagree	agree	disagree
0.678472	man	45	45 to 59 years	1	none	self employed	< baccalaureate degree	alone	under 15.000 €		Technician and associate professional Service and office worker Workers	9 people or less	other services	120	35	Standard duration (Less than 39h)	never	never	never	Individual office	600	>1h30	no	never	70	fully disagree	fully disagree		fully disagree		fully disagree		fully disagree	fully disagree	fully disagree	fully disagree	fully disagree	fully disagree	fully disagree	fully disagree		fully disagree	fully disagree	fully disagree	fully disagree	fully disagree		disagree
1.18981	man	40	35 to 44 years	4	2	full time	Bac + 3	married/free union	Over 36.000 €	Senior managers		9 people or less	other services	31	37	Standard duration (Less than 39h)	never	never	never	open space	90	1h to 1h30	1 day per week	never	0	disagree	disagree	disagree	disagree	disagree	disagree	agree	agree	agree	agree	fully disagree	disagree	disagree	disagree	agree	fully disagree	fully agree	agree	disagree	disagree	agree	fully agree	agree	disagree
0.897866	man	39	35 to 44 years	4	2	full time	Bac + 3	married/free union	Over 36.000 €	Senior managers		100 to 499 people	Industry	39	45	Long duration (39 to 50h)	often	often	often	Commercial permises	35	31 to 45 minutes	1 day per week	never	16	agree	agree	agree	fully agree	agree	agree	fully agree	agree	fully agree	disagree	fully agree	agree	agree	fully agree	disagree	agree	agree	agree	fully agree	fully agree	agree	agree	agree	fully agree
0.361864	man	34	25 to 34 years	2	none	full time	Bac + 3	married/free union	Over 36.000 €	Senior managers		500 people or more	other services	90	35	Standard duration (Less than 39h)	rarely	never	rarely	open space	30	16 to 30 minutes	1 day per week	never	4	agree	agree	disagree	fully disagree	disagree	disagree	agree	agree	disagree	agree	disagree	agree	disagree	agree	agree	agree	disagree	agree	disagree	disagree	agree	disagree	agree	agree
1.00524	woman	57	45 to 59 years	4	none	part time	Bac + 3	married/free union	Over 36.000 €	Senior managers		100 to 499 people	Education, health and social work	420	28	Standard duration (Less than 39h)	never	never	never	Individual office	15	<15 minutes	no	never	8	disagree	agree	disagree	agree	disagree	agree	disagree	agree	agree	agree	agree	disagree	disagree	disagree	disagree	disagree	fully disagree	agree	agree	agree	disagree	fully agree	agree	fully agree
1.19689	woman	53	45 to 59 years	4	none	part time	Bac + 2	alone	24 to 36.000 €	Technician and associate professional		10 to 49 people	Education, health and social work	36	26	Standard duration (Less than 39h)	never	never	never	open space	90	1h to 1h30	no	2 to 4 periods	27	fully disagree	disagree	disagree	disagree	agree	agree	fully disagree	agree	agree	agree	disagree	fully disagree	agree	disagree	fully disagree	agree	agree	agree	agree	agree	fully agree	disagree	agree	disagree
0.30894	man	42	35 to 44 years	4	2	full time	Baccalaureate degree	married/free union	Over 36.000 €	Technician and associate professional		500 people or more	other services	50	39	Long duration (39 to 50h)	Very often	Very often	Very often	external site	12	<15 minutes	no	never	22	disagree	fully agree	disagree	agree	agree	agree	fully disagree	agree	agree	disagree	disagree	fully disagree	agree	fully disagree	fully disagree	agree	fully disagree	agree	fully agree	agree	agree	agree	agree	disagree
0.563773	woman	42	35 to 44 years	4	2	full time	Baccalaureate degree	En union libre	Over 36.000 €	Workers		500 people or more	Industry	216	39	Long duration (39 to 50h)	rarely	never	rarely	production or workshop	30	16 to 30 minutes	no	>4	58	fully agree	agree	fully disagree	fully disagree	fully disagree	disagree	disagree	disagree	disagree	agree	agree	disagree	agree	agree	disagree	disagree	agree	agree	fully agree	disagree	disagree	fully disagree	agree	disagree
0.773111	man	50	45 to 59 years	4	none	full time	< baccalaureate degree	married/free union	24 to 36.000 €	Service and office worker		500 people or more	other services	193	36	Standard duration (Less than 39h)	rarely	never	rarely	Individual office	30	16 to 30 minutes	no	1 period	37	fully agree	agree	fully disagree	disagree	disagree	agree	agree	fully disagree	fully agree	fully disagree	fully disagree	agree	disagree	disagree	disagree	agree	disagree	fully disagree	disagree	agree	fully disagree	disagree	fully disagree	disagree
0.948272	man	38	35 to 44 years	2	none	full time	Bac + 3	married/free union	Over 36.000 €	Senior managers		100 to 499 people	Education, health and social work	18	40	Long duration (39 to 50h)	rarely	never	never	Individual office	45	31 to 45 minutes	no	2 to 4 periods	11	fully disagree	fully disagree	disagree	agree	agree	agree	fully agree	disagree	fully agree	disagree	agree	fully disagree	agree	fully disagree	disagree	agree	fully disagree	agree	fully disagree	fully agree	agree	agree	agree	fully disagree
1.07639	woman	54	45 to 59 years	3	none	full time	Baccalaureate degree	married/free union	Over 36.000 €	Service and office worker		100 to 499 people	other services	120	35	Standard duration (Less than 39h)	never	never	never	Individual office	5	<15 minutes	no	2 to 4 periods	0	disagree	agree	disagree	disagree	disagree	fully agree	disagree	disagree	agree	agree	agree	disagree	disagree	agree	agree	agree	fully disagree	disagree	agree	agree	agree	disagree	agree	agree
1.03806	man	50	45 to 59 years	3	1	self employed	< baccalaureate degree	married/free union	15 to 24.000 €		Craftsman, shopkeeper, entrepreneur		building	242	50	Long duration (39 to 50h)	rarely	never	often	at customers	20	16 to 30 minutes	no	1 period	16	disagree	agree		agree		agree		agree	fully agree	agree	agree	disagree	fully agree	fully disagree	fully disagree		disagree	fully agree	agree	agree	fully agree		agree
1.30569	man	45	45 to 59 years	2	none	full time	Baccalaureate degree	married/free union		Service and office worker		9 people or less	trading	11	39	Long duration (39 to 50h)	Very often	never	often	other	90	1h to 1h30	no	never	1	disagree	agree	disagree	disagree	agree	agree	disagree	disagree	agree	agree	disagree	disagree	agree	disagree	disagree	disagree	disagree	agree	disagree	agree	disagree	disagree	disagree	disagree
0.828893	man	40	35 to 44 years	2	none	full time	Bac + 3	married/free union		Senior managers		500 people or more	Education, health and social work	102	40	Long duration (39 to 50h)	often	rarely	often	Individual office	35	31 to 45 minutes	no	never	11	fully disagree	disagree	fully disagree	agree	disagree	agree	fully disagree	agree	fully agree	fully agree	fully agree	fully disagree	agree	fully disagree	fully disagree	agree	fully disagree	agree	fully disagree	fully disagree	disagree	disagree	agree	fully disagree
0.470608	woman	29	25 to 34 years	2	none	full time	Bac + 3	En union libre	Over 36.000 €	Senior managers		500 people or more	Education, health and social work	127	40	Long duration (39 to 50h)	never	never	never	open space	35	31 to 45 minutes	no	never	22	agree	fully agree	agree	agree	agree	agree	disagree	agree	agree	agree	fully disagree	disagree	agree	agree	disagree	agree	agree	agree	disagree	agree	agree	agree	agree	disagree
0.403028	woman	43	35 to 44 years	1	none	self employed	Baccalaureate degree	alone	under 15.000 €		Technician and associate professional Service and office worker Workers	9 people or less	Education, health and social work	3	50	Long duration (39 to 50h)	Very often	rarely	rarely	at home	30	16 to 30 minutes		2 to 4 periods	14	disagree	fully agree		fully agree		fully agree		fully disagree	agree	fully agree	fully disagree	agree	agree	disagree	fully disagree		disagree	agree	fully agree	fully agree	agree		disagree
1.00235	woman	59	45 to 59 years	2	none	full time	Bac + 3	married/free union	Over 36.000 €	Senior managers		10 to 49 people	Education, health and social work	420	45	Long duration (39 to 50h)	Very often	rarely	Very often	Individual office	60	46 to 60 minutes	more than one day a week	2 to 4 periods	39	agree	disagree	agree	disagree	disagree	agree	disagree	fully agree	disagree	disagree	agree	agree	agree	agree	disagree	agree	disagree	disagree	agree	disagree	agree	disagree	agree	disagree
0.848473	man	45	45 to 59 years	5 and more	2	full time	Bac + 2	married/free union	24 to 36.000 €	Technician and associate professional		100 to 499 people	Industry	218	35	Standard duration (Less than 39h)	never	never	never	open space	130	>1h30	no	2 to 4 periods	15	disagree	agree	agree	agree	agree	agree	agree	agree	disagree	disagree	agree	agree	agree	agree	fully agree	disagree	fully agree	disagree	disagree	disagree	disagree	disagree	agree	agree
1.47222	man	52	45 to 59 years	2	none	self employed	Bac + 2	married/free union	under 15.000 €		Senior managers		Education, health and social work	48	20	Standard duration (Less than 39h)	rarely	never	never	at home	0	<15 minutes		2 to 4 periods	4	disagree	disagree		agree		agree		agree	agree	agree	disagree	agree	agree	disagree	disagree		fully disagree	agree	disagree	agree	agree		agree
0.861845	man	28	25 to 34 years	3	1	full time	Bac + 3	En union libre	Over 36.000 €	Technician and associate professional		100 to 499 people	building	60	39	Long duration (39 to 50h)	never	never	rarely	external site	30	16 to 30 minutes	no	2 to 4 periods	16	disagree	disagree	agree	disagree	agree	disagree	disagree	agree	agree	agree	fully agree	disagree	fully agree	agree	agree	agree	agree	agree	agree	fully agree	agree	agree	agree	agree
1.20118	woman	29	25 to 34 years	2	none	full time	Bac + 3	En union libre	15 to 24.000 €	Senior managers		100 to 499 people	Education, health and social work	48	38	Standard duration (Less than 39h)	Very often	never	never	other	30	16 to 30 minutes	no	never	12	fully disagree	disagree	agree	agree	agree	agree	disagree	agree	agree	fully disagree	agree	fully agree	agree	agree	disagree	agree	agree	agree	disagree	agree	disagree	agree	agree	agree
1.00802	woman	45	45 to 59 years	1	none	full time	Bac + 3	alone	15 to 24.000 €	Technician and associate professional		100 to 499 people	Education, health and social work	197	35	Standard duration (Less than 39h)	often	rarely	Very often	Individual office	30	16 to 30 minutes	a half day per week	1 period	8	disagree	agree	agree	disagree	agree	fully agree	fully disagree	agree	fully agree	disagree	agree	disagree	agree	disagree	disagree	disagree	fully disagree	agree	agree	fully agree	disagree	fully agree	agree	disagree
1.4169	woman	54	45 to 59 years	4	none	full time	Baccalaureate degree	married/free union	Over 36.000 €	Service and office worker		9 people or less	trading	42	36	Standard duration (Less than 39h)	Very often	never	never	Commercial permises	30	16 to 30 minutes	no	never	13	disagree	disagree	agree	disagree	agree	agree	disagree	disagree	agree	agree	disagree	disagree	agree	agree	disagree	agree	disagree	agree	disagree	agree	agree	agree	disagree	disagree
1.98148	woman	30	25 to 34 years	5 and more	3	full time	Baccalaureate degree	married/free union	24 to 36.000 €	Service and office worker		9 people or less	other services	60	30	Standard duration (Less than 39h)	rarely	rarely	rarely	Individual office	45	31 to 45 minutes	a half day per week	never	44	disagree	fully disagree	agree	fully agree	disagree	disagree	disagree	disagree	disagree	agree	fully disagree	fully agree	fully agree	fully agree	disagree	agree	fully disagree	agree	agree	agree	agree	fully disagree	agree	disagree
1.01256	woman	41	35 to 44 years	1	none	part time	Bac + 3	alone	under 15.000 €	Technician and associate professional		100 to 499 people	Education, health and social work	204	15	Standard duration (Less than 39h)	often	never	never	other	120	>1h30	no	2 to 4 periods	41	disagree	agree	fully disagree	fully disagree	fully disagree	disagree	fully agree	disagree	fully disagree	fully agree	disagree	disagree	fully disagree	agree	fully agree	fully disagree	fully agree	disagree	agree	agree	fully disagree	fully disagree	agree	disagree
0.776801	man	35	35 to 44 years	2	1	full time	Baccalaureate degree	alone	15 to 24.000 €	Service and office worker		100 to 499 people	other services	180	36	Standard duration (Less than 39h)	never	never	never	open space	30	16 to 30 minutes	no	never	0	disagree	disagree	agree	agree	agree	agree	agree	disagree	agree	agree	agree	disagree	agree	disagree	disagree	agree	disagree	agree	disagree	agree	agree	disagree	agree	agree
0.745917	man	48	45 to 59 years	5 and more	3	part time	< baccalaureate degree	married/free union	Over 36.000 €	Service and office worker		50 to 99 people	Education, health and social work	240	30	Standard duration (Less than 39h)	rarely	never	never	open space	30	16 to 30 minutes	no	1 period	32	fully agree	agree	agree	disagree	agree	agree	disagree	disagree	agree	fully disagree	agree	disagree	disagree	fully disagree	disagree	agree	fully disagree	disagree	disagree	disagree	agree	agree	agree	fully disagree
0.963716	man	50	45 to 59 years	2	none	full time	< baccalaureate degree	En union libre	24 to 36.000 €	Workers		100 to 499 people	Industry	156	37	Standard duration (Less than 39h)	rarely	never	rarely	production or workshop	25	16 to 30 minutes	no	>4	20	disagree	fully agree	agree	disagree	agree	fully agree	disagree	agree	agree	agree	disagree	fully disagree	agree	disagree	fully disagree	fully agree	fully disagree	agree	agree	agree	agree	agree	disagree	disagree
0.897978	man	32	25 to 34 years	5 and more	3	full time	< baccalaureate degree	married/free union	24 to 36.000 €	Service and office worker		500 people or more	other services	12	35	Standard duration (Less than 39h)	rarely	never	rarely	external site	10	<15 minutes	no	>4	11	disagree	agree	disagree	disagree	disagree	agree	fully disagree	disagree	fully agree	agree	fully disagree	disagree	agree	fully disagree	disagree	disagree	disagree	disagree	disagree	agree	agree	fully agree	disagree	fully disagree
0.726691	man	33	25 to 34 years	3	1	self employed	Bac + 3	married/free union	24 to 36.000 €		Craftsman, shopkeeper, entrepreneur	9 people or less	other services	50	55	Very Long duration (More than50h)	often	never	rarely	Individual office	5	<15 minutes	no	1 period	22	fully disagree	disagree		fully agree		fully agree		agree	fully agree	fully agree	agree	fully disagree	fully agree	fully disagree	fully disagree		fully disagree	fully agree	agree	agree	fully agree		agree
0.76686	man	41	35 to 44 years	4	2	full time	Bac + 2	married/free union	24 to 36.000 €	Service and office worker		50 to 99 people	Transports	29	35	Standard duration (Less than 39h)	rarely	never	rarely	other	12	<15 minutes	no	never	10	fully disagree	agree	agree	agree	agree	agree	agree	disagree	fully agree	agree	fully agree	agree	agree	agree	agree	agree	agree	agree	agree	agree	agree	fully agree	agree	agree
1.15181	woman	29	25 to 34 years	2	none	full time	Bac + 3	En union libre		Service and office worker		500 people or more	Education, health and social work	60	35	Standard duration (Less than 39h)	often	rarely	Very often	Individual office	15	<15 minutes	no	1 period	43	fully disagree	fully agree	disagree	fully agree	disagree	agree	fully disagree	fully agree	agree	fully agree	agree	fully agree	agree	disagree	fully disagree	fully disagree	fully disagree	agree	fully agree	fully agree	fully disagree	fully agree	fully agree	agree
0.6245	woman	40	35 to 44 years	2	1	self employed	Baccalaureate degree	alone	under 15.000 €		Craftsman, shopkeeper, entrepreneur		other services	60	20	Standard duration (Less than 39h)	Very often	never	often	at home	0	<15 minutes		2 to 4 periods	2	agree	fully agree		disagree		fully agree		agree	fully agree	fully agree	fully agree	disagree	agree	disagree	disagree		fully disagree	fully agree	fully agree	agree	fully agree		agree
1.67838	woman	32	25 to 34 years	2	none	part time	Baccalaureate degree	En union libre	15 to 24.000 €	Service and office worker		9 people or less	building	60	19	Standard duration (Less than 39h)	never	never	never	Commercial permises	10	<15 minutes	no	>4	13	agree	disagree	agree	disagree	agree	agree	disagree	agree	agree	disagree	agree	disagree	agree	agree	fully disagree	agree	disagree	agree	agree	disagree	agree	disagree	agree	disagree
0.34478	man	53	45 to 59 years	2	none	full time	Bac + 3	married/free union	Over 36.000 €	Senior managers		500 people or more	other services	360	40	Long duration (39 to 50h)	rarely	never	rarely	Individual office	20	16 to 30 minutes	no	never	7	disagree	agree	disagree	disagree	agree	agree	fully disagree	agree	fully agree	agree	disagree	disagree	agree	disagree	fully disagree	agree	fully disagree	agree	disagree	agree	agree	disagree	agree	disagree
1.03244	man	58	45 to 59 years	3	1	self employed	Baccalaureate degree	married/free union			Craftsman, shopkeeper, entrepreneur		other services	240	50	Long duration (39 to 50h)	often	rarely	often	at home	120	>1h30		2 to 4 periods	14	fully disagree	disagree		fully agree		disagree		fully agree	disagree	agree	fully agree	agree	agree	disagree	agree		disagree	disagree	agree	agree	disagree		fully agree
1.40661	woman	31	25 to 34 years	3	none	full time	Bac + 3	alone		Service and office worker		10 to 49 people	other services	59	39	Long duration (39 to 50h)	often	never	never	Commercial permises	30	16 to 30 minutes	no	never	10	disagree	disagree	disagree	fully disagree	fully disagree	agree	fully disagree	disagree	fully agree	fully agree	disagree	disagree	agree	disagree	disagree	disagree	disagree	fully agree	disagree	fully agree	fully agree	agree	disagree	fully disagree
0.941037	man	29	25 to 34 years	1	none	full time	< baccalaureate degree	alone	15 to 24.000 €	Technician and associate professional		10 to 49 people	other services	60	37	Standard duration (Less than 39h)	rarely	never	never	open space	20	16 to 30 minutes	no	2 to 4 periods	21	fully disagree	disagree	disagree	fully agree	agree	agree	disagree	agree	agree	agree	disagree	fully disagree	fully agree	disagree	disagree	agree	disagree	agree	agree	agree	fully agree	disagree	agree	disagree
0.951136	man	44	35 to 44 years	3	1	full time	Bac + 3	En union libre	Over 36.000 €	Technician and associate professional		100 to 499 people	other services	276	60	Very Long duration (More than50h)	rarely	rarely	rarely	open space	180	>1h30	no	never	17	disagree	agree	agree	agree	agree	agree	agree	agree	agree	agree	agree	agree	agree	agree	agree	agree	agree	agree	agree	agree	agree	agree	agree	agree
1.47759	woman	53	45 to 59 years	2	none	part time	< baccalaureate degree	married/free union	Over 36.000 €	Technician and associate professional		9 people or less	Transports	300	28	Standard duration (Less than 39h)	often	never	never	Individual office	18	16 to 30 minutes	1 day per week	1 period	30	disagree	fully agree	agree	agree	agree	disagree	fully disagree	agree	fully agree	agree	fully disagree	fully disagree	fully agree	disagree	fully disagree	agree	disagree	disagree	disagree	fully agree	agree	agree	agree	fully disagree
1.0629	man	51	45 to 59 years	3	none	full time	< baccalaureate degree	married/free union	24 to 36.000 €	Workers		10 to 49 people	building	113	39	Long duration (39 to 50h)	rarely	rarely	rarely	external site	25	16 to 30 minutes	no	never	33	fully disagree	fully agree	fully agree	agree	agree	fully agree	fully disagree	agree	fully agree	fully agree	agree	agree	fully agree	disagree	fully disagree	fully agree	fully agree	fully agree	agree	fully agree	agree	fully agree	agree	disagree
0.366819	man	42	35 to 44 years	3	1	full time	< baccalaureate degree	married/free union	24 to 36.000 €	Senior managers		500 people or more	Insurance and real estate	266	45	Long duration (39 to 50h)	Very often	never	never	Commercial permises	25	16 to 30 minutes	no	never	16	fully disagree	fully agree	fully disagree	fully disagree	fully disagree	agree	fully disagree	fully disagree	agree	fully agree	agree	fully agree	fully disagree	fully disagree	agree	fully disagree	fully disagree	disagree	fully agree	fully disagree	fully disagree	fully disagree	fully agree	agree
0.845631	man	34	25 to 34 years	1	none	full time	Bac + 2	alone	15 to 24.000 €	Service and office worker		100 to 499 people	Industry	78	35	Standard duration (Less than 39h)	never	never	never	Individual office	25	16 to 30 minutes	no	1 period	19	disagree	disagree	agree	agree	agree	agree	fully disagree	disagree	agree	disagree	disagree	fully disagree	agree	disagree	fully disagree	agree	fully disagree	agree	disagree	agree	agree	agree	agree	disagree
1.22701	woman	28	25 to 34 years	5 and more	3	full time	Bac + 2	married/free union	24 to 36.000 €	Service and office worker		10 to 49 people	other services	84	32	Standard duration (Less than 39h)	never	never	never	open space	45	31 to 45 minutes	more than one day a week	1 period	18	fully agree	fully disagree	disagree	fully disagree	disagree	agree	disagree	disagree	fully agree	fully agree	disagree	disagree	disagree	fully agree	disagree	fully disagree	disagree	fully agree	disagree	disagree	fully agree	fully disagree	fully agree	fully disagree
0.982522	woman	41	35 to 44 years	2	none	full time	Bac + 3	married/free union	24 to 36.000 €	Technician and associate professional		100 to 499 people	other services	26	35	Standard duration (Less than 39h)	never	never	never	Individual office	35	31 to 45 minutes	no	>4	15	fully disagree	fully disagree	fully agree	agree	agree	fully agree	fully disagree	agree	fully agree	agree	fully disagree	fully disagree	fully agree	disagree	fully disagree	agree	fully disagree	agree	agree	fully agree	fully agree	disagree	agree	fully disagree
0.850466	man	35	35 to 44 years	3	1	full time	Bac + 2	married/free union	Over 36.000 €	Service and office worker		10 to 49 people	trading	156	50	Long duration (39 to 50h)	Very often	never	often	Commercial permises	20	16 to 30 minutes	no	2 to 4 periods	15	disagree	disagree	agree	fully agree	agree	agree	fully disagree	fully agree	fully agree	agree	disagree	agree	agree	fully disagree	disagree	agree	fully disagree	agree	disagree	agree	agree	agree	agree	disagree
1.49291	man	29	25 to 34 years	2	none	full time	Baccalaureate degree	En union libre	Over 36.000 €	Workers		10 to 49 people	trading	36	40	Long duration (39 to 50h)	Very often	rarely	rarely	production or workshop	45	31 to 45 minutes	no	never	7	fully disagree	agree	disagree	fully agree	agree	agree	fully disagree	agree	fully agree	disagree	agree	disagree	fully agree	disagree	disagree	disagree	fully disagree	agree	disagree	fully agree	agree	agree	disagree	agree
0.784688	man	43	35 to 44 years	4	2	full time	Bac + 2	married/free union	15 to 24.000 €	Senior managers		100 to 499 people	other services	50	38	Standard duration (Less than 39h)	rarely	never	never	Individual office	15	<15 minutes	no	never	8	disagree	fully disagree	disagree	disagree	disagree	agree	agree	agree	agree	agree	agree	agree	disagree	agree	disagree	fully disagree	disagree	agree	agree	agree	disagree	agree	agree	disagree
1.70472	woman	30	25 to 34 years	2	none	full time	Bac + 3	En union libre	Over 36.000 €	Technician and associate professional		9 people or less	other services	96	35	Standard duration (Less than 39h)	never	never	rarely	Individual office	45	31 to 45 minutes	no	never	19	fully disagree	fully agree	agree	agree	fully agree	agree	fully disagree	agree	fully agree	agree	disagree	disagree	agree	fully disagree	disagree	agree	fully disagree	disagree	agree	agree	agree	disagree	agree	disagree
0.938497	man	34	25 to 34 years	2	none	full time	Bac + 3	married/free union	Over 36.000 €	Senior managers		10 to 49 people	other services	63	37	Standard duration (Less than 39h)	rarely	never	rarely	open space	40	31 to 45 minutes	no	never	21	disagree	agree	disagree	fully disagree	disagree	agree	disagree	agree	agree	fully agree	fully agree	fully disagree	agree	agree	fully disagree	disagree	agree	agree	agree	agree	agree	disagree	agree	disagree
0.919703	man	57	45 to 59 years	2	none	part time	< baccalaureate degree	married/free union	15 to 24.000 €	Service and office worker		10 to 49 people	other services	180	35	Standard duration (Less than 39h)	rarely	often	Very often	at customers	90	1h to 1h30	no	>4	8	disagree	disagree	agree	agree	agree	agree	disagree	disagree	disagree	disagree	disagree	disagree	agree	agree	agree	agree	agree	disagree	agree	agree	agree	disagree	disagree	disagree
1.06929	woman	42	35 to 44 years	1	none	full time	Bac + 3	alone	15 to 24.000 €	Technician and associate professional		50 to 99 people	other services	232	35	Standard duration (Less than 39h)	often	never	never	Individual office	20	16 to 30 minutes	no	never	6	fully disagree	fully disagree	agree	fully agree	agree	fully agree	fully disagree	fully disagree	fully agree	disagree	fully disagree	fully disagree	fully agree	disagree	fully disagree	agree	fully disagree	agree	disagree	fully agree	agree	fully agree	fully disagree	fully disagree
1.01288	man	29	25 to 34 years	5 and more	3	full time	Bac + 3	En union libre	Over 36.000 €	Senior managers		100 to 499 people	other services	48	39	Long duration (39 to 50h)	often	never	rarely	Individual office	90	1h to 1h30	a half day per week	never	20	disagree	disagree	agree	agree	agree	agree	fully agree	agree	agree	agree	agree	disagree	fully agree	disagree	disagree	agree	agree	agree	disagree	fully agree	agree	agree	agree	disagree
0.963716	man	58	45 to 59 years	1	none	part time	< baccalaureate degree	alone	15 to 24.000 €	Workers		100 to 499 people	Industry	482	20	Standard duration (Less than 39h)	rarely	rarely	often	production or workshop	25	16 to 30 minutes	no	never	12	disagree	agree	agree	agree	agree	agree	agree	agree	agree	agree	agree	agree	agree	agree	disagree	agree	agree	agree	agree	agree	disagree	agree	agree	agree
0.731789	man	50	45 to 59 years	2	none	full time	Bac + 2	married/free union	15 to 24.000 €	Service and office worker		100 to 499 people	other services	48	40	Long duration (39 to 50h)	rarely	often	Very often	Individual office	0	<15 minutes	a half day per week	2 to 4 periods	12	agree	agree	disagree	agree	disagree	agree	fully disagree	disagree	agree	agree	disagree	agree	agree	disagree	disagree	agree	fully disagree	fully agree	disagree	agree	disagree	agree	disagree	fully disagree
1.0029	man	29	25 to 34 years	4	none	full time	< baccalaureate degree	alone	Over 36.000 €	Technician and associate professional		50 to 99 people	Industry	10	38	Standard duration (Less than 39h)	never	never	never	production or workshop	20	16 to 30 minutes	no	2 to 4 periods	0	agree	agree	disagree	disagree	disagree	disagree	disagree	agree	agree	agree	agree	agree	disagree	agree	agree	disagree	disagree	disagree	disagree	disagree	agree	disagree	agree	agree
0.292462	man	53	45 to 59 years	2	none	full time	Bac + 2	married/free union	Over 36.000 €	Technician and associate professional		500 people or more	other services	360	40	Long duration (39 to 50h)	never	never	never	at customers	160	>1h30	no	never	8	agree	agree	disagree	disagree	disagree	agree	agree	agree	agree	disagree	agree	agree	disagree	agree	disagree	disagree	agree	disagree	disagree	agree	disagree	disagree	disagree	disagree
1.2426	woman	31	25 to 34 years	3	1	full time	Bac + 3	married/free union	Over 36.000 €	Senior managers		10 to 49 people	Industry	66	40	Long duration (39 to 50h)	rarely	never	rarely	open space	60	46 to 60 minutes	a half day per week	never	13	fully disagree	fully disagree	fully agree	fully agree	fully agree	fully agree	fully disagree	agree	agree	disagree	fully agree	disagree	fully agree	fully agree	fully disagree	fully disagree	disagree	agree	fully agree	fully agree	fully agree	fully agree	fully disagree	disagree
2.02345	woman	42	35 to 44 years	3	1	full time	Bac + 2	En union libre	under 15.000 €	Workers		9 people or less	other services	228	48	Long duration (39 to 50h)	rarely	never	rarely	production or workshop	15	<15 minutes	no	never	47	agree	agree	fully disagree	disagree	fully disagree	fully disagree	fully disagree	fully disagree	fully agree	agree	fully agree	agree	fully disagree	agree	agree	fully disagree	disagree	fully disagree	agree	fully disagree	fully disagree	fully disagree	disagree	fully agree
1.42945	woman	46	45 to 59 years	2	1	full time	Bac + 3	En union libre	Over 36.000 €	Senior managers		9 people or less	other services	18	45	Long duration (39 to 50h)	never	never	rarely	open space	70	1h to 1h30	no	2 to 4 periods	19	disagree	agree	disagree	fully disagree	fully disagree	agree	disagree	disagree	disagree	disagree	disagree	disagree	disagree	agree	fully agree	fully disagree	fully agree	disagree	fully agree	disagree	agree	disagree	disagree	fully agree
1.05121	woman	35	35 to 44 years	1	none	full time	Bac + 3	alone	15 to 24.000 €	Service and office worker		500 people or more	other services	118	39	Long duration (39 to 50h)	rarely	never	often	Individual office	10	<15 minutes	no	never	15	disagree	disagree	disagree	agree	agree	fully agree	fully disagree	agree	agree	agree	agree	fully disagree	fully agree	disagree	fully disagree	fully agree	fully disagree	agree	disagree	fully agree	fully agree	disagree	agree	disagree
0.829253	man	43	35 to 44 years	5 and more	3	full time	Bac + 3	married/free union	Over 36.000 €	Technician and associate professional		50 to 99 people	other services	37	35	Standard duration (Less than 39h)	rarely	rarely	rarely	Individual office	30	16 to 30 minutes	no	1 period	11	fully disagree	agree	fully agree	agree	agree	agree	fully disagree	disagree	fully agree	disagree	disagree	disagree	agree	fully disagree	fully disagree	agree	disagree	agree	disagree	agree	agree	disagree	fully disagree	fully disagree
0.442624	woman	51	45 to 59 years	4	2	self employed	< baccalaureate degree	En union libre	under 15.000 €		Craftsman, shopkeeper, entrepreneur		trading	264	44	Long duration (39 to 50h)	Very often	never	rarely	Commercial permises	30	16 to 30 minutes	no	2 to 4 periods	43	disagree	fully disagree		fully agree		agree		fully disagree	disagree	fully agree	fully disagree	agree	fully disagree	fully disagree	fully disagree		fully disagree	fully disagree	disagree	disagree	agree		fully disagree
1.16274	woman	33	25 to 34 years	4	2	full time	Baccalaureate degree	married/free union	Over 36.000 €	Technician and associate professional		100 to 499 people	other services	6	35	Standard duration (Less than 39h)	rarely	never	often	Individual office	60	46 to 60 minutes	no	never	38	disagree	disagree	agree	agree	agree	agree	disagree	agree	agree	agree	fully agree	agree	agree	agree	disagree	agree	disagree	disagree	agree	agree	agree	disagree	agree	agree
0.802195	man	38	35 to 44 years	4	2	full time	Bac + 3	married/free union	Over 36.000 €	Technician and associate professional		500 people or more	other services	96	36	Standard duration (Less than 39h)	never	never	never	Individual office	240	>1h30	1 day per week	1 period	33	disagree	agree	agree	agree	agree	agree	disagree	agree	agree	agree	agree	disagree	agree	disagree	disagree	fully agree	fully agree	fully agree	disagree	agree	agree	agree	agree	agree
1.08559	woman	32	25 to 34 years	1	none	full time	Bac + 3	alone	15 to 24.000 €	Service and office worker		100 to 499 people	trading	96	35	Standard duration (Less than 39h)	rarely	never	rarely	open space	80	1h to 1h30	no	never	46	agree	disagree	fully disagree	disagree	disagree	agree	fully disagree	agree	agree	agree	disagree	agree	fully disagree	disagree	disagree	disagree	disagree	disagree	disagree	agree	agree	fully disagree	agree	disagree
1.28073	woman	58	45 to 59 years	3	none	full time	< baccalaureate degree	married/free union	Over 36.000 €	Workers		100 to 499 people	Industry	204	35	Standard duration (Less than 39h)	never	rarely	never	production or workshop	20	16 to 30 minutes	no	2 to 4 periods	0	agree	agree	disagree	disagree	agree	agree	agree	agree	agree	agree	disagree	agree	agree	agree	agree	disagree	agree	agree	agree	disagree	disagree	agree	agree	agree
1.6383	woman	24	18 to 24 years	2	none	full time	Bac + 3	alone		Senior managers		500 people or more	trading	4	38	Standard duration (Less than 39h)	never	never	never	open space	30	16 to 30 minutes	no	1 period	16	disagree	disagree	agree	agree	disagree	agree	fully disagree	agree	fully agree	agree	disagree	fully disagree	agree	agree	disagree	disagree	fully disagree	agree	disagree	agree	agree	disagree	agree	disagree
1.19689	woman	58	45 to 59 years	1	none	full time	Baccalaureate degree	alone	15 to 24.000 €	Technician and associate professional		10 to 49 people	Insurance and real estate	360	33	Standard duration (Less than 39h)	never	never	never	Individual office	60	46 to 60 minutes	no	never	15	disagree	disagree	disagree	agree	agree	agree	fully disagree	disagree	agree	fully disagree	disagree	fully disagree	agree	disagree	fully disagree	agree	fully disagree	agree	agree	agree	agree	agree	agree	disagree
1.4984	man	57	45 to 59 years	2	none	full time	< baccalaureate degree	married/free union	15 to 24.000 €	Workers		9 people or less	other services	120	35	Standard duration (Less than 39h)	often	never	often	other	15	<15 minutes	no	never	0	agree	agree	agree	agree	agree	agree	agree	agree	agree	agree	agree	agree	agree	agree	agree	agree	agree	agree	agree	agree	agree	agree	agree	agree
0.718699	man	40	35 to 44 years	5 and more	3	self employed	Bac + 3	married/free union	24 to 36.000 €		Craftsman, shopkeeper, entrepreneur		other services	60	8	Standard duration (Less than 39h)	rarely	rarely	rarely	Individual office	5	<15 minutes	no	2 to 4 periods	0	disagree	agree		disagree		agree		agree	disagree	disagree	agree	disagree	disagree	disagree	disagree		agree	agree	disagree	disagree	disagree		disagree
0.964693	woman	57	45 to 59 years	2	none	full time	Baccalaureate degree	married/free union		Service and office worker		500 people or more	Education, health and social work	300	40	Long duration (39 to 50h)	rarely	never	never	at home	0	<15 minutes		never	23	disagree	disagree	agree	agree	agree	agree	fully disagree	disagree	agree	agree	disagree	agree	agree	disagree	disagree	agree	fully disagree	agree	disagree	agree	agree	disagree	disagree	disagree
1.06947	woman	44	35 to 44 years	1	none	part time	Bac + 3	alone	under 15.000 €	Senior managers		10 to 49 people	Education, health and social work	102	24	Standard duration (Less than 39h)	never	never	never	other	30	16 to 30 minutes	no	>4	21	fully disagree	disagree	disagree	disagree	agree	agree	agree	disagree	disagree	agree	disagree	disagree	agree	disagree	disagree	disagree	disagree	agree	disagree	disagree	disagree	agree	disagree	disagree
0.796272	man	40	35 to 44 years	3	1	full time	< baccalaureate degree	married/free union	24 to 36.000 €	Service and office worker		500 people or more	Transports	120	39	Long duration (39 to 50h)	never	never	never	other	40	31 to 45 minutes	no	never	2	fully disagree	fully agree	disagree	disagree	agree	disagree	fully disagree	agree	agree	agree	agree	fully agree	fully disagree	fully disagree	agree	fully disagree	fully agree	agree	agree	disagree	fully disagree	agree	agree	disagree
0.476634	woman	38	35 to 44 years	3	1	full time	Bac + 3	married/free union	Over 36.000 €	Senior managers		500 people or more	Insurance and real estate	48	45	Long duration (39 to 50h)	rarely	never	rarely	Individual office	80	1h to 1h30	no	never	10	disagree	disagree	disagree	disagree	agree	agree	disagree	agree	agree	disagree	agree	disagree	agree	agree	disagree	agree	disagree	disagree	disagree	disagree	agree	disagree	agree	agree
1.04717	woman	49	45 to 59 years	1	none	full time	Bac + 2	alone	24 to 36.000 €	Technician and associate professional		10 to 49 people	Industry	241	35	Standard duration (Less than 39h)	never	never	never	Individual office	20	16 to 30 minutes	no	1 period	10	agree	agree	fully disagree	fully disagree	fully disagree	agree	disagree	fully disagree	fully agree	disagree	disagree	disagree	fully disagree	agree	agree	disagree	fully disagree	fully disagree	agree	agree	disagree	fully agree	agree	disagree
1.66754	woman	58	45 to 59 years	3	none	full time	Baccalaureate degree	married/free union	24 to 36.000 €	Service and office worker		9 people or less	trading	360	35	Standard duration (Less than 39h)	never	never	never	Commercial permises	60	46 to 60 minutes	no	2 to 4 periods	46	disagree	agree	disagree	disagree	disagree	fully disagree	disagree	agree	agree	disagree	agree	agree	disagree	agree	agree	disagree	disagree	disagree	fully agree	disagree	disagree	disagree	agree	agree
1.52125	woman	44	35 to 44 years	4	2	full time	Bac + 3	married/free union	Over 36.000 €	Senior managers		9 people or less	Industry	36	40	Long duration (39 to 50h)	often	never	never	other	75	1h to 1h30	no	1 period	26	disagree	agree	agree	agree	agree	agree	fully disagree	fully agree	agree	fully agree	agree	disagree	agree	agree	fully disagree	disagree	agree	agree	disagree	agree	agree	disagree	agree	disagree
1.21885	woman	38	35 to 44 years	4	2	full time	Bac + 3	married/free union	Over 36.000 €	Senior managers		500 people or more	other services	112	39	Long duration (39 to 50h)	never	never	never	Individual office	40	31 to 45 minutes	more than one day a week	1 period	13	fully disagree	agree	disagree	fully disagree	disagree	agree	agree	agree	agree	agree	disagree	disagree	disagree	disagree	fully disagree	disagree	disagree	agree	disagree	agree	disagree	disagree	agree	disagree
0.710152	man	56	45 to 59 years	2	none	full time	< baccalaureate degree	married/free union	24 to 36.000 €	Technician and associate professional		50 to 99 people	other services	48	39	Long duration (39 to 50h)	rarely	rarely	often	external site	90	1h to 1h30	no	never	4	disagree	fully agree	agree	fully agree	fully agree	agree	fully disagree	disagree	fully agree	agree	fully disagree	disagree	fully agree	fully disagree	fully disagree	fully agree	agree	fully agree	agree	fully agree	fully agree	fully agree	agree	fully disagree
0.755593	man	52	45 to 59 years	2	none	full time	Bac + 2	married/free union	Over 36.000 €	Technician and associate professional		50 to 99 people	Education, health and social work	426	40	Long duration (39 to 50h)	often	never	never	other	20	16 to 30 minutes	no	never	8	disagree	disagree	agree	disagree	fully agree	fully agree	fully disagree	disagree	fully agree	fully disagree	disagree	fully disagree	agree	agree	fully disagree	fully agree	fully disagree	fully agree	disagree	fully agree	fully agree	fully agree	disagree	fully disagree
0.959755	woman	53	45 to 59 years	3	none	full time	Bac + 2	alone	15 to 24.000 €	Service and office worker		500 people or more	Education, health and social work	348	37	Standard duration (Less than 39h)	never	never	never	other	5	<15 minutes	no	1 period	9	disagree	disagree	disagree	disagree	agree	agree	disagree	fully disagree	agree	disagree	disagree	disagree	agree	disagree	fully disagree	agree	fully disagree	agree	disagree	agree	agree	agree	disagree	disagree
0.989496	man	26	25 to 34 years	2	none	full time	Bac + 2	married/free union	24 to 36.000 €	Service and office worker		50 to 99 people	other services	60	35	Standard duration (Less than 39h)	never	never	never	Individual office	90	1h to 1h30	no	1 period	9	fully disagree	fully disagree	agree	fully disagree	agree	agree	fully disagree	disagree	fully agree	fully agree	fully disagree	fully disagree	agree	agree	fully disagree	fully agree	agree	agree	agree	agree	fully agree	disagree	agree	fully disagree
0.895832	woman	52	45 to 59 years	3	2	self employed	< baccalaureate degree	alone	under 15.000 €		Technician and associate professional Service and office worker Workers	9 people or less	other services	98	23	Standard duration (Less than 39h)	never	never	never	at customers	10	<15 minutes	no	never	28	fully disagree	disagree		disagree		fully agree		fully disagree	fully agree	disagree	disagree	fully disagree	agree	fully disagree	fully disagree		fully disagree	agree	disagree	fully agree	fully agree		fully disagree
1.0316	man	61	60 years and more	2	none	full time	Bac + 3	married/free union	Over 36.000 €	Technician and associate professional		9 people or less	other services	420	38	Standard duration (Less than 39h)	rarely	never	often	open space	50	46 to 60 minutes	no	never	3	disagree	fully agree	agree	agree	agree	agree	fully disagree	agree	agree	fully agree	disagree	agree	agree	disagree	disagree	agree	disagree	disagree	agree	agree	agree	agree	agree	disagree
0.859425	man	31	25 to 34 years	1	none	full time	Bac + 3	alone	15 to 24.000 €	Senior managers		100 to 499 people	Education, health and social work	67	45	Long duration (39 to 50h)	Very often	rarely	Very often	at home	20	16 to 30 minutes		2 to 4 periods	21	agree	agree	agree	agree	agree	fully agree	fully disagree	disagree	disagree	agree	agree	disagree	agree	fully agree	agree	disagree	fully disagree	agree	disagree	agree	agree	agree	agree	agree
1.76621	woman	42	35 to 44 years	4	2	full time	Bac + 2	married/free union	Over 36.000 €	Service and office worker		9 people or less	Insurance and real estate	240	35	Standard duration (Less than 39h)	never	never	never	Individual office	40	31 to 45 minutes	no	1 period	0	disagree	agree	disagree	agree	agree	agree	disagree	agree	agree	agree	disagree	disagree	agree	disagree	disagree	agree	agree	agree	agree	agree	agree	disagree	agree	disagree
1.01288	man	32	25 to 34 years	3	1	full time	Bac + 2	married/free union	24 to 36.000 €	Senior managers		100 to 499 people	trading	39	42	Long duration (39 to 50h)	rarely	never	rarely	open space	25	16 to 30 minutes	no	1 period	9	agree	agree	agree	agree	agree	agree	disagree	agree	agree	agree	disagree	disagree	disagree	disagree	disagree	disagree	fully disagree	agree	disagree	agree	disagree	agree	agree	disagree
0.857105	man	25	25 to 34 years	1	none	full time	Bac + 3	alone	15 to 24.000 €	Technician and associate professional		100 to 499 people	Transports	50	40	Long duration (39 to 50h)	often	never	rarely	open space	30	16 to 30 minutes	no	never	35	fully disagree	disagree	fully disagree	disagree	fully disagree	agree	fully disagree	disagree	agree	agree	disagree	fully disagree	agree	fully disagree	agree	fully agree	fully disagree	fully agree	disagree	agree	disagree	fully disagree	agree	disagree
0.476634	woman	39	35 to 44 years	3	2	full time	Bac + 3	alone	24 to 36.000 €	Senior managers		500 people or more	Education, health and social work	14	45	Long duration (39 to 50h)	often	never	never	Individual office	40	31 to 45 minutes	no	never	36	fully disagree	agree	disagree	fully disagree	fully disagree	disagree	agree	agree	fully disagree	fully agree	disagree	fully agree	disagree	disagree	fully agree	agree	fully disagree	disagree	fully agree	disagree	disagree	fully disagree	agree	fully disagree
1.03806	man	55	45 to 59 years	3	1	self employed	< baccalaureate degree	married/free union			Craftsman, shopkeeper, entrepreneur		building	151	45	Long duration (39 to 50h)	often	never	often	at customers	30	16 to 30 minutes	no	2 to 4 periods	12	fully disagree	fully disagree		fully disagree		agree		fully disagree	agree	agree	fully disagree	fully disagree	agree	fully disagree	fully disagree		fully disagree	fully disagree	agree	agree	agree		agree
0.346125	man	56	45 to 59 years	4	2	full time	< baccalaureate degree	married/free union	15 to 24.000 €	Technician and associate professional		500 people or more	Industry	309	43	Long duration (39 to 50h)	rarely	never	rarely	open space	35	31 to 45 minutes	no	never	23	agree	agree	agree	agree	agree	disagree	fully disagree	agree	agree	fully disagree	fully agree	agree	fully agree	agree	disagree	agree	disagree	agree	agree	fully agree	disagree	agree	disagree	disagree
0.290293	man	59	45 to 59 years	4	none	part time	Baccalaureate degree	married/free union	24 to 36.000 €	Technician and associate professional		500 people or more	trading	70	35	Standard duration (Less than 39h)	never	never	never	other	15	<15 minutes	no	1 period	14	fully agree	disagree	disagree	agree	agree	agree	agree	disagree	agree	agree	disagree	disagree	fully agree	disagree	fully disagree	disagree	disagree	agree	disagree	agree	agree	disagree	disagree	fully disagree
0.810246	man	53	45 to 59 years	3	1	part time	Bac + 3	married/free union	Over 36.000 €	Senior managers		10 to 49 people	Education, health and social work	48	30	Standard duration (Less than 39h)	never	never	never	Individual office	40	31 to 45 minutes	no	never	16	disagree	disagree	agree	agree	agree	disagree	disagree	disagree	agree	fully agree	agree	disagree	agree	agree	disagree	agree	fully disagree	agree	agree	agree	agree	fully agree	disagree	agree
1.00235	woman	54	45 to 59 years	5 and more	2	part time	Bac + 3	married/free union	Over 36.000 €	Senior managers		100 to 499 people	Education, health and social work	300	40	Long duration (39 to 50h)	Very often	never	never	at home	60	46 to 60 minutes		1 period	8	fully disagree	disagree	agree	disagree	disagree	agree	agree	agree	agree	fully agree	disagree	disagree	agree	agree	disagree	agree	agree	agree	disagree	agree	agree	agree	agree	fully disagree
1.04717	woman	52	45 to 59 years	4	2	part time	Bac + 3	En union libre	15 to 24.000 €	Technician and associate professional		10 to 49 people	Education, health and social work	300	15	Standard duration (Less than 39h)	never	never	often	other	90	1h to 1h30	more than one day a week	>4	13	disagree	disagree	agree	disagree	agree	agree	fully disagree	agree	agree	fully agree	disagree	agree	agree	agree	disagree	disagree	agree	agree	disagree	fully agree	disagree	disagree	agree	disagree
1.03806	man	48	45 to 59 years	5 and more	none	self employed	< baccalaureate degree	married/free union	Over 36.000 €		Craftsman, shopkeeper, entrepreneur		other services	240	50	Long duration (39 to 50h)	Very often	rarely	rarely	Commercial permises	25	16 to 30 minutes	a half day per week	2 to 4 periods	13	disagree	agree		fully agree		fully agree		fully agree	agree	fully agree	agree	agree	fully agree	agree	fully disagree		disagree	disagree	disagree	fully agree	fully agree		fully agree
1.20036	woman	33	25 to 34 years	4	2	full time	Bac + 3	married/free union	Over 36.000 €	Technician and associate professional		500 people or more	other services	84	40	Long duration (39 to 50h)	rarely	never	rarely	open space	30	16 to 30 minutes	no	never	6	disagree	agree	disagree	disagree	disagree	agree	disagree	agree	agree	disagree	agree	agree	agree	agree	disagree	agree	disagree	agree	disagree	agree	disagree	agree	agree	disagree
0.978175	woman	51	45 to 59 years	3	none	full time	Baccalaureate degree	alone	15 to 24.000 €	Technician and associate professional		50 to 99 people	other services	75	37	Standard duration (Less than 39h)	rarely	never	rarely	open space	90	1h to 1h30	no	never	40	disagree	agree	disagree	disagree	disagree	disagree	disagree	agree	agree	agree	disagree	disagree	disagree	agree	agree	disagree	disagree	disagree	fully disagree	disagree	disagree	disagree	disagree	disagree
0.639483	woman	53	45 to 59 years	1	none	self employed	Bac + 2	alone	24 to 36.000 €		Senior managers		building	120	40	Long duration (39 to 50h)	often	never	rarely	at customers	90	1h to 1h30	more than one day a week	1 period	15	fully disagree	fully disagree		agree		agree		agree	fully agree	disagree	disagree	fully disagree	agree	fully disagree	fully disagree		fully disagree	fully agree	agree	fully agree	agree		agree
0.781216	man	53	45 to 59 years	2	none	full time	< baccalaureate degree	En union libre	under 15.000 €	Technician and associate professional		500 people or more	other services	248	38	Standard duration (Less than 39h)	never	never	never	open space	15	<15 minutes	no	2 to 4 periods	12	agree	agree	fully agree	fully disagree	disagree	agree	disagree	fully disagree	agree	fully agree	fully disagree	disagree	disagree	fully agree	disagree	disagree	fully disagree	fully disagree	fully disagree	agree	fully agree	disagree	fully disagree	fully disagree
0.729785	man	47	45 to 59 years	4	2	full time	Bac + 2	alone	24 to 36.000 €	Service and office worker		100 to 499 people	trading	120	45	Long duration (39 to 50h)	often	never	often	other	90	1h to 1h30	1 day per week	never	57	fully agree	agree	fully disagree	fully disagree	fully disagree	disagree	agree	agree	fully agree	fully agree	fully agree	fully agree	fully disagree	fully agree	fully agree	fully disagree	fully agree	fully disagree	fully agree	disagree	disagree	fully disagree	fully agree	fully agree
0.410124	woman	59	45 to 59 years	2	none	self employed	< baccalaureate degree	married/free union	Over 36.000 €		Technician and associate professional Service and office worker Workers	9 people or less	Education, health and social work	228	35	Standard duration (Less than 39h)	never	never	never	Individual office	20	16 to 30 minutes	no	never	20	disagree	fully disagree		agree		agree		fully disagree	fully agree	agree	disagree	agree	fully agree	disagree	fully disagree		fully disagree	agree	disagree	fully agree	agree		disagree
1.03806	man	55	45 to 59 years	3	none	self employed	Bac + 2	married/free union	24 to 36.000 €		Craftsman, shopkeeper, entrepreneur		trading	78	80	Very Long duration (More than50h)	rarely	never	often	Commercial permises	40	31 to 45 minutes	no	never	13	disagree	fully disagree		fully agree		fully agree		disagree	agree	fully agree	agree	disagree	fully agree	fully disagree	fully disagree		fully disagree	fully agree	agree	agree	fully agree		disagree
0.810246	man	47	45 to 59 years	2	none	full time	Bac + 3	married/free union	Over 36.000 €	Senior managers		10 to 49 people	Education, health and social work	240	37	Standard duration (Less than 39h)	Very often	never	never	Commercial permises	50	46 to 60 minutes	no	1 period	28	agree	fully agree	disagree	disagree	disagree	disagree	fully disagree	agree	agree	fully disagree	disagree	fully agree	agree	disagree	agree	disagree	disagree	disagree	fully agree	agree	agree	agree	fully agree	agree
1.30344	woman	57	45 to 59 years	2	none	self employed	Baccalaureate degree	married/free union	under 15.000 €		Farmers		other services	48	40	Long duration (39 to 50h)	Very often	never	rarely	other	0	<15 minutes	no	never	8	disagree	disagree		agree		agree		fully disagree	fully agree	disagree	disagree	fully disagree	agree	disagree	fully disagree		fully disagree	fully agree	disagree	fully agree	agree		disagree
0.346125	man	49	45 to 59 years	2	1	full time	Bac + 2	alone		Technician and associate professional		500 people or more	Industry	96	40	Long duration (39 to 50h)	never	never	never	flex office	50	46 to 60 minutes	no	never	30	agree	agree	fully disagree	agree	agree	disagree	fully disagree	agree	fully agree	fully agree	disagree	disagree	agree	fully disagree	disagree	disagree	fully disagree	agree	agree	agree	agree	fully disagree	agree	disagree
0.989496	man	33	25 to 34 years	2	none	full time	Bac + 2	En union libre	24 to 36.000 €	Service and office worker		50 to 99 people	other services	168	39	Long duration (39 to 50h)	never	never	never	open space	50	46 to 60 minutes	no	1 period	32	fully agree	fully agree	disagree	agree	disagree	agree	fully disagree	agree	agree	fully disagree	agree	fully disagree	agree	fully agree	disagree	agree	fully disagree	disagree	agree	disagree	agree	fully disagree	agree	agree
1.73681	woman	34	25 to 34 years	3	none	full time	Bac + 2	alone	15 to 24.000 €	Service and office worker		9 people or less	Insurance and real estate	168	40	Long duration (39 to 50h)	Very often	never	never	Commercial permises	10	<15 minutes	no	2 to 4 periods	41	agree	agree	fully agree	agree	agree	fully agree	agree	agree	agree	fully agree	fully disagree	agree	agree	agree	fully disagree	agree	agree	agree	fully agree	agree	agree	agree	agree	agree
0.99538	woman	43	35 to 44 years	4	2	full time	Bac + 2	married/free union	Over 36.000 €	Service and office worker		100 to 499 people	trading	240	35	Standard duration (Less than 39h)	Very often	never	rarely	Commercial permises	25	16 to 30 minutes	no	never	35	disagree	agree	fully disagree	fully disagree	disagree	fully disagree	agree	agree	disagree	fully agree	agree	fully agree	disagree	disagree	agree	fully disagree	fully disagree	fully agree	disagree	fully disagree	agree	disagree	agree	agree
0.640775	man	64	60 years and more	2	none	full time	< baccalaureate degree	married/free union	24 to 36.000 €	Service and office worker		50 to 99 people	other services	488	35	Standard duration (Less than 39h)	never	rarely	rarely	external site	75	1h to 1h30	no	never	22	agree	disagree	agree	disagree	disagree	agree	disagree	disagree	fully agree	agree	agree	agree	agree	agree	agree	agree	disagree	agree	disagree	agree	agree	agree	disagree	disagree
0.998466	man	55	45 to 59 years	2	none	full time	Baccalaureate degree	married/free union	24 to 36.000 €	Workers		100 to 499 people	other services	300	40	Long duration (39 to 50h)	often	often	Very often	at customers	360	>1h30	no	never	11	fully disagree	agree	agree	agree	agree	agree	fully disagree	agree	agree	disagree	disagree	agree	fully agree	fully disagree	fully disagree	agree	fully agree	fully agree	fully agree	fully agree	fully agree	agree	agree	disagree
0.886312	man	35	35 to 44 years	1	none	full time	Bac + 2	alone	24 to 36.000 €	Senior managers		50 to 99 people	Insurance and real estate	18	40	Long duration (39 to 50h)	rarely	never	never	open space	60	46 to 60 minutes	no	1 period	24	agree	fully agree	disagree	fully disagree	fully disagree	disagree	disagree	fully disagree	fully agree	fully agree	disagree	fully agree	fully disagree	disagree	fully agree	fully disagree	disagree	agree	fully agree	disagree	fully disagree	fully disagree	agree	fully agree
1.28382	woman	29	25 to 34 years	1	none	full time	Bac + 3	alone	Over 36.000 €	Senior managers		50 to 99 people	other services	24	39	Long duration (39 to 50h)	never	never	rarely	Individual office	90	1h to 1h30	1 day per week	never	23	agree	disagree	fully disagree	fully disagree	disagree	agree	fully disagree	agree	fully agree	fully agree	fully disagree	fully disagree	fully disagree	agree	fully disagree	fully disagree	agree	agree	fully disagree	disagree	agree	fully disagree	agree	disagree
1.29505	woman	41	35 to 44 years	1	none	part time	< baccalaureate degree	alone	under 15.000 €	Workers		50 to 99 people	Industry	120	7	Standard duration (Less than 39h)	never	never	never	other	15	<15 minutes	no	>4	58	fully disagree	disagree	agree	agree	agree	fully agree	fully disagree	fully disagree	agree	agree	fully disagree	fully disagree	agree	fully disagree	fully disagree	agree	fully disagree	agree	disagree	fully agree	fully agree	disagree	disagree	fully disagree
0.908675	woman	51	45 to 59 years	1	none	full time	Baccalaureate degree	alone	15 to 24.000 €	Service and office worker		100 to 499 people	other services	72	35	Standard duration (Less than 39h)	never	never	never	Individual office	30	16 to 30 minutes	no	2 to 4 periods	6	agree	disagree	agree	disagree	agree	agree	disagree	disagree	agree	disagree	fully disagree	disagree	agree	disagree	disagree	agree	disagree	disagree	disagree	agree	agree	agree	disagree	disagree
0.776801	man	36	35 to 44 years	3	1	full time	Bac + 3	En union libre	15 to 24.000 €	Service and office worker		100 to 499 people	trading	183	35	Standard duration (Less than 39h)	often	never	never	other	45	31 to 45 minutes	no	never	8	agree	fully disagree	fully disagree	fully disagree	agree	disagree	fully disagree	fully disagree	agree	disagree	disagree	agree	disagree	fully disagree	agree	disagree	disagree	fully disagree	fully disagree	agree	agree	disagree	disagree	fully disagree
0.72966	man	49	45 to 59 years	2	none	self employed	Bac + 2	alone	15 to 24.000 €		Craftsman, shopkeeper, entrepreneur		trading	276	40	Long duration (39 to 50h)	rarely	never	often	at home	0	<15 minutes		1 period	17	disagree	disagree		agree		agree		agree	agree	fully agree	disagree	agree	disagree	agree	agree		disagree	fully disagree	agree	agree	disagree		disagree
0.897866	man	41	35 to 44 years	3	1	full time	Bac + 2	married/free union	24 to 36.000 €	Senior managers		100 to 499 people	Transports	180	38	Standard duration (Less than 39h)	often	often	Very often	Individual office	60	46 to 60 minutes	a half day per week	never	32	agree	fully agree	agree	agree	agree	agree	agree	disagree	disagree	disagree	agree	agree	fully disagree	agree	agree	agree	agree	disagree	disagree	disagree	fully disagree	agree	agree	disagree
0.387421	woman	45	45 to 59 years	4	1	full time	Baccalaureate degree	En union libre	Over 36.000 €	Service and office worker		500 people or more	trading	264	35	Standard duration (Less than 39h)	often	never	never	Commercial permises	15	<15 minutes	no	never	21	fully agree	agree	agree	fully disagree	fully disagree	disagree	fully disagree	disagree	agree	agree	disagree	fully agree	agree	disagree	agree	disagree	disagree	disagree	agree	disagree	disagree	fully disagree	fully agree	disagree
0.785011	man	43	35 to 44 years	3	1	full time	Bac + 2	married/free union	24 to 36.000 €	Technician and associate professional		100 to 499 people	other services	240	35	Standard duration (Less than 39h)	rarely	never	rarely	open space	40	31 to 45 minutes	no	never	12	disagree	agree	disagree	disagree	disagree	agree	disagree	agree	agree	disagree	fully agree	disagree	disagree	agree	disagree	disagree	disagree	disagree	fully disagree	agree	agree	disagree	agree	disagree
0.959755	woman	52	45 to 59 years	2	none	full time	< baccalaureate degree	married/free union	24 to 36.000 €	Service and office worker		10 to 49 people	Education, health and social work	26	35	Standard duration (Less than 39h)	never	never	never	other	555	>1h30	no	>4	8	disagree	disagree	disagree	disagree	agree	agree	disagree	disagree	fully agree	agree	disagree	fully disagree	agree	disagree	fully disagree	agree	agree	agree	disagree	agree	agree	agree	disagree	disagree
1.30721	man	31	25 to 34 years	2	none	full time	Baccalaureate degree	En union libre	under 15.000 €	Workers		10 to 49 people	Transports	123	45	Long duration (39 to 50h)	often	often	Very often	other	0	<15 minutes	no	2 to 4 periods	8	fully agree	fully agree	fully disagree	fully disagree	fully agree	disagree	fully agree	fully agree	fully agree	fully agree	fully agree	fully agree	fully disagree	fully agree	fully agree	fully agree	fully agree	fully agree	fully agree	fully agree	fully agree	fully agree	fully agree	fully disagree
1.01745	man	43	35 to 44 years	4	2	self employed	Baccalaureate degree	married/free union	15 to 24.000 €		Craftsman, shopkeeper, entrepreneur		trading	11	50	Long duration (39 to 50h)	Very often	never	never	Commercial permises	20	16 to 30 minutes	no	never	8	disagree	agree		agree		agree		disagree	agree	disagree	agree	disagree	agree	disagree	fully disagree		disagree	agree	disagree	agree	agree		agree
0.5162	woman	57	45 to 59 years	2	none	full time	< baccalaureate degree	married/free union		Workers		500 people or more	Industry	30	35	Standard duration (Less than 39h)	never	never	never	production or workshop	10	<15 minutes	no	never	14	agree	disagree	disagree	agree	disagree	agree	fully disagree	fully disagree	agree	fully disagree	disagree	disagree	agree	fully disagree	disagree	disagree	fully disagree	agree	fully disagree	agree	fully agree	agree	fully disagree	fully disagree
0.753222	man	49	45 to 59 years	4	1	part time	Bac + 3	married/free union	Over 36.000 €	Senior managers		50 to 99 people	other services	125	35	Standard duration (Less than 39h)	never	never	never	Individual office	10	<15 minutes	no	never	10	fully disagree	agree	agree	disagree	agree	agree	fully disagree	disagree	agree	fully agree	agree	fully disagree	agree	agree	fully disagree	disagree	fully disagree	agree	agree	agree	agree	agree	agree	disagree
0.919703	man	59	45 to 59 years	1	none	part time	Bac + 2	alone		Service and office worker		10 to 49 people	other services	84	17	Standard duration (Less than 39h)	never	never	never	other	30	16 to 30 minutes	no	>4	12	disagree	agree	agree	agree	agree	agree	disagree	agree	agree	agree	disagree	disagree	agree	disagree	disagree	agree	disagree	agree	disagree	agree	agree	disagree	disagree	disagree
1.0722	woman	32	25 to 34 years	4	2	full time	Bac + 2	En union libre	Over 36.000 €	Service and office worker		50 to 99 people	other services	84	40	Long duration (39 to 50h)	never	never	never	Individual office	20	16 to 30 minutes	no	never	15	disagree	agree	agree	disagree	disagree	agree	fully disagree	agree	agree	agree	agree	agree	agree	disagree	disagree	agree	disagree	agree	disagree	agree	agree	agree	agree	disagree
0.500582	man	44	35 to 44 years	4	2	full time	Baccalaureate degree	married/free union	Over 36.000 €	Workers		500 people or more	Transports	216	35	Standard duration (Less than 39h)	often	rarely	Very often	other	60	46 to 60 minutes	no	1 period	8	agree	agree	fully disagree	disagree	disagree	disagree	disagree	disagree	agree	disagree	disagree	fully agree	disagree	agree	disagree	disagree	agree	disagree	fully agree	disagree	agree	disagree	agree	disagree
0.898209	woman	64	60 years and more	3	1	full time	Bac + 3	married/free union	Over 36.000 €	Senior managers		500 people or more	Education, health and social work	240	45	Long duration (39 to 50h)	rarely	never	rarely	Individual office	25	16 to 30 minutes	a half day per week	never	5	fully disagree	agree	disagree	agree	disagree	fully agree	fully disagree	agree	fully agree	disagree	agree	agree	agree	disagree	fully disagree	disagree	fully disagree	agree	agree	fully agree	agree	agree	fully agree	disagree
0.316431	man	42	35 to 44 years	4	2	full time	Bac + 2	married/free union	Over 36.000 €	Service and office worker		500 people or more	other services	139	42	Long duration (39 to 50h)	often	Very often	often	open space	65	1h to 1h30	no	1 period	23	disagree	agree	agree	agree	agree	agree	disagree	agree	agree	disagree	disagree	fully agree	agree	disagree	agree	agree	fully agree	agree	agree	agree	agree	agree	agree	disagree
0.395661	man	59	45 to 59 years	2	none	full time	< baccalaureate degree	married/free union	Over 36.000 €	Workers		500 people or more	Industry	240	35	Standard duration (Less than 39h)	often	Very often	Very often	production or workshop	10	<15 minutes	no	2 to 4 periods	15	agree	fully agree	agree	agree	agree	agree	fully disagree	agree	fully agree	disagree	disagree	disagree	agree	disagree	fully disagree	agree	fully disagree	fully agree	fully agree	agree	fully agree	agree	disagree	agree
0.781216	man	47	45 to 59 years	2	none	full time	Bac + 2	En union libre	24 to 36.000 €	Technician and associate professional		500 people or more	other services	349	35	Standard duration (Less than 39h)	never	never	rarely	Individual office	15	<15 minutes	no	never	11	disagree	fully agree	fully agree	fully agree	fully agree	fully agree	fully disagree	disagree	fully agree	fully disagree	fully disagree	fully disagree	fully agree	fully disagree	disagree	fully agree	fully disagree	fully agree	fully agree	fully agree	fully agree	fully agree	fully disagree	fully disagree
0.970245	woman	48	45 to 59 years	5 and more	3	full time	Bac + 3	married/free union	Over 36.000 €	Senior managers		500 people or more	Education, health and social work	60	18	Standard duration (Less than 39h)	often	never	never	Individual office	450	>1h30	more than one day a week	never	8	agree	agree	disagree	disagree	disagree	disagree	disagree	agree	agree	disagree	agree	agree	disagree	disagree	agree	disagree	agree	disagree	agree	agree	disagree	disagree	agree	agree
0.8206	man	38	35 to 44 years	2	none	full time	< baccalaureate degree	alone	24 to 36.000 €	Service and office worker		100 to 499 people	other services	228	39	Long duration (39 to 50h)	Very often	Very often	Very often	production or workshop	600	>1h30	no	never	9	fully disagree	agree	agree	fully agree	disagree	agree	fully disagree	agree	agree	fully agree	agree	fully disagree	fully agree	agree	disagree	agree	disagree	agree	fully agree	fully agree	fully disagree	agree	agree	disagree
1.10341	man	46	45 to 59 years	4	2	full time	Bac + 2	married/free union	Over 36.000 €	Service and office worker		9 people or less	Transports	240	39	Long duration (39 to 50h)	never	never	never	open space	20	16 to 30 minutes	no	never	0	agree	agree	agree	agree	agree	agree	agree	agree	agree	agree	agree	agree	agree	agree	agree	agree	agree	agree	agree	agree	agree	agree	agree	agree
0.802195	man	38	35 to 44 years	5 and more	3	full time	Bac + 3	married/free union	15 to 24.000 €	Technician and associate professional		500 people or more	other services	144	40	Long duration (39 to 50h)	never	never	never	open space	15	<15 minutes	no	never	15	agree	disagree	disagree	disagree	disagree	agree	disagree	agree	fully agree	disagree	disagree	fully disagree	disagree	disagree	fully agree	disagree	fully disagree	disagree	disagree	agree	agree	disagree	fully agree	disagree
0.994262	woman	46	45 to 59 years	5 and more	2	part time	Bac + 2	married/free union		Service and office worker		10 to 49 people	Education, health and social work	204	35	Standard duration (Less than 39h)	rarely	often	often	external site	60	46 to 60 minutes	more than one day a week	1 period	0	disagree	agree	agree	agree	disagree	disagree	disagree	disagree	agree	agree	disagree	fully agree	agree	disagree	agree	disagree	agree	disagree	agree	agree	disagree	agree	agree	disagree
0.80391	man	57	45 to 59 years	3	1	full time	Bac + 2	alone		Service and office worker		10 to 49 people	trading	300	35	Standard duration (Less than 39h)	never	never	never	Individual office	5	<15 minutes	no	1 period	22	disagree	agree	disagree	disagree	disagree	agree	disagree	agree	agree	disagree	disagree	agree	agree	agree	disagree	agree	fully disagree	agree	agree	agree	fully agree	disagree	agree	disagree
0.923648	woman	45	45 to 59 years	4	3	full time	Bac + 3	alone	Over 36.000 €	Senior managers		100 to 499 people	Education, health and social work	36	36	Standard duration (Less than 39h)	often	often	never	Individual office	60	46 to 60 minutes	no	1 period	10	disagree	fully agree	agree	agree	agree	fully agree	disagree	disagree	agree	agree	disagree	agree	agree	disagree	disagree	agree	disagree	agree	agree	agree	agree	agree	disagree	disagree
1.71143	woman	32	25 to 34 years	2	none	full time	Bac + 3	En union libre	15 to 24.000 €	Technician and associate professional		9 people or less	other services	130	35	Standard duration (Less than 39h)	never	never	rarely	open space	0	<15 minutes	no	never	56	agree	disagree	disagree	fully disagree	fully disagree	fully disagree	fully agree	agree	agree	fully agree	agree	agree	fully disagree	disagree	fully agree	fully disagree	fully disagree	disagree	agree	fully disagree	agree	fully disagree	agree	disagree
1.17998	woman	55	45 to 59 years	2	none	full time	< baccalaureate degree	En union libre	Over 36.000 €	Service and office worker		10 to 49 people	other services	204	37	Standard duration (Less than 39h)	never	never	never	Individual office	120	>1h30	no	never	7	fully disagree	agree	disagree	disagree	agree	agree	disagree	disagree	fully agree	fully disagree	disagree	fully disagree	agree	agree	fully disagree	agree	fully agree	fully agree	fully disagree	agree	agree	agree	agree	disagree
1.12636	woman	32	25 to 34 years	1	none	full time	Bac + 3	alone	under 15.000 €	Technician and associate professional		50 to 99 people	Education, health and social work	3	38	Standard duration (Less than 39h)	never	never	never	open space	15	<15 minutes	no	never	19	fully disagree	disagree	fully disagree	agree	disagree	agree	fully disagree	disagree	agree	fully agree	disagree	disagree	agree	agree	agree	agree	fully disagree	agree	disagree	agree	disagree	fully disagree	agree	disagree
0.862256	man	46	45 to 59 years	5 and more	3	self employed	Bac + 2	married/free union	24 to 36.000 €		Craftsman, shopkeeper, entrepreneur		Transports	48	70	Very Long duration (More than50h)	Very often	often	Very often	external site	20	16 to 30 minutes	no	never	25	disagree	agree		agree		agree		agree	agree	agree	disagree	fully agree	disagree	fully disagree	fully disagree		agree	disagree	fully agree	agree	agree		agree
0.73989	man	39	35 to 44 years	3	1	full time	Bac + 2	married/free union	under 15.000 €	Service and office worker		50 to 99 people	building	216	35	Standard duration (Less than 39h)	never	never	never	Individual office	60	46 to 60 minutes	no	2 to 4 periods	20	agree	agree	fully agree	fully agree	fully agree	fully agree	agree	fully agree	agree	fully agree	fully agree	fully agree	agree	agree	agree	agree	fully agree	agree	fully agree	agree	agree	fully agree	agree	fully agree
1.00235	woman	52	45 to 59 years	2	none	full time	Bac + 3	married/free union	Over 36.000 €	Senior managers		50 to 99 people	Education, health and social work	54	45	Long duration (39 to 50h)	never	never	never	Individual office	5	<15 minutes	no	1 period	12	disagree	fully agree	agree	agree	agree	agree	fully disagree	fully agree	fully agree	agree	disagree	agree	agree	disagree	disagree	agree	fully disagree	agree	disagree	agree	agree	agree	agree	fully disagree
0.810246	man	47	45 to 59 years	4	2	full time	Bac + 2	married/free union	24 to 36.000 €	Senior managers		10 to 49 people	other services	120	40	Long duration (39 to 50h)	rarely	never	often	Individual office	120	>1h30	no	never	52	disagree	agree	agree	agree	agree	agree	agree	disagree	disagree	disagree	disagree	agree	disagree	agree	disagree	agree	disagree	disagree	agree	disagree	disagree	disagree	disagree	disagree
0.802195	man	44	35 to 44 years	2	none	full time	Bac + 3	En union libre	15 to 24.000 €	Technician and associate professional		100 to 499 people	other services	12	35	Standard duration (Less than 39h)	rarely	rarely	rarely	other	60	46 to 60 minutes	no	1 period	5	agree	disagree	disagree	fully disagree	agree	agree	disagree	agree	fully agree	disagree	disagree	fully disagree	disagree	disagree	disagree	agree	fully disagree	agree	disagree	agree	agree	agree	disagree	disagree
0.368226	man	40	35 to 44 years	1	none	full time	Bac + 3	alone	Over 36.000 €	Technician and associate professional		500 people or more	other services	18	35	Standard duration (Less than 39h)	never	never	often	open space	80	1h to 1h30	a half day per week	2 to 4 periods	66	agree	agree	agree	agree	fully disagree	disagree	agree	agree	disagree	agree	agree	agree	disagree	fully agree	fully agree	agree	fully agree	disagree	agree	disagree	fully agree	disagree	agree	agree
0.986123	woman	42	35 to 44 years	4	2	part time	Bac + 3	married/free union	Over 36.000 €	Service and office worker		50 to 99 people	Education, health and social work	57	25	Standard duration (Less than 39h)	never	never	never	other	10	<15 minutes	no	1 period	7	fully disagree	agree	fully disagree	fully disagree	disagree	fully agree	agree	fully disagree	agree	disagree	disagree	disagree	agree	agree	disagree	agree	fully disagree	agree	fully agree	agree	agree	agree	disagree	fully disagree
0.73989	man	36	35 to 44 years	3	1	full time	Baccalaureate degree	married/free union		Service and office worker		50 to 99 people	other services	84	35	Standard duration (Less than 39h)	often	never	rarely	Individual office	20	16 to 30 minutes	no	never	16	disagree	fully agree	disagree	disagree	agree	agree	disagree	fully disagree	agree	fully agree	disagree	disagree	fully agree	agree	fully disagree	agree	disagree	fully agree	agree	fully agree	fully agree	agree	agree	disagree
1.0095	woman	40	35 to 44 years	1	none	full time	< baccalaureate degree	alone	15 to 24.000 €	Technician and associate professional		100 to 499 people	Education, health and social work	185	35	Standard duration (Less than 39h)	Very often	never	never	other	20	16 to 30 minutes	no	2 to 4 periods	47	disagree	agree	fully disagree	disagree	disagree	agree	fully agree	fully disagree	fully agree	agree	fully agree	disagree	fully agree	fully disagree	disagree	agree	fully disagree	disagree	disagree	fully agree	agree	agree	fully disagree	disagree
0.390799	woman	46	45 to 59 years	4	2	full time	Bac + 3	married/free union	Over 36.000 €	Senior managers		500 people or more	other services	84	35	Standard duration (Less than 39h)	Very often	Very often	often	Individual office	40	31 to 45 minutes	a half day per week	never	5	agree	agree	agree	agree	agree	fully agree	fully agree	agree	agree	agree	agree	fully agree	agree	disagree	agree	fully agree	disagree	fully agree	disagree	disagree	fully agree	agree	fully agree	disagree
1.38262	man	64	60 years and more	2	none	full time	< baccalaureate degree	married/free union		Workers		9 people or less	building	120	35	Standard duration (Less than 39h)	rarely	never	never	external site	120	>1h30	no	never	8	disagree	disagree	agree	agree	agree	agree	disagree	disagree	agree	disagree	disagree	disagree	agree	disagree	fully disagree	agree	disagree	agree	agree	agree	agree	agree	agree	disagree
0.541286	woman	33	25 to 34 years	1	none	full time	Bac + 3	alone	24 to 36.000 €	Technician and associate professional		500 people or more	other services	72	45	Long duration (39 to 50h)	often	never	Very often	open space	40	31 to 45 minutes	no	never	58	disagree	agree	disagree	agree	disagree	agree	disagree	agree	fully disagree	agree	agree	agree	disagree	agree	agree	disagree	disagree	disagree	agree	disagree	disagree	disagree	agree	agree
0.951136	man	40	35 to 44 years	4	2	full time	Bac + 3	married/free union		Technician and associate professional		500 people or more	Transports	156	39	Long duration (39 to 50h)	never	rarely	never	open space	60	46 to 60 minutes	no	never	2	disagree	disagree	disagree	disagree	disagree	agree	disagree	agree	agree	fully agree	disagree	disagree	disagree	disagree	disagree	disagree	disagree	disagree	disagree	disagree	disagree	disagree	disagree	disagree
0.994262	woman	57	45 to 59 years	3	none	full time	Bac + 2	married/free union	24 to 36.000 €	Service and office worker		500 people or more	other services	84	39	Long duration (39 to 50h)	never	never	often	Individual office	90	1h to 1h30	no	1 period	8	disagree	fully agree	agree	disagree	agree	agree	disagree	agree	agree	agree	fully agree	disagree	disagree	fully disagree	fully disagree	fully disagree	agree	agree	agree	fully disagree	fully agree	disagree	agree	agree
0.882448	woman	36	35 to 44 years	4	2	self employed	< baccalaureate degree	married/free union	24 to 36.000 €		Technician and associate professional Service and office worker Workers	9 people or less	other services	86	35	Standard duration (Less than 39h)	never	never	never	at home	0	<15 minutes		never	13	agree	fully agree		fully agree		fully agree		agree	agree	agree	disagree	agree	agree	fully agree	agree		agree	fully agree	agree	agree	fully agree		disagree
1.05121	woman	38	35 to 44 years	4	2	full time	Bac + 2	married/free union		Service and office worker		50 to 99 people	Education, health and social work	60	35	Standard duration (Less than 39h)	never	never	never	flex office	15	<15 minutes	no	1 period	0	disagree	disagree	disagree	disagree	disagree	disagree	disagree	disagree	disagree	disagree	disagree	disagree	agree	disagree	disagree	disagree	disagree	disagree	disagree	disagree	disagree	disagree	disagree	disagree
1.09133	woman	46	45 to 59 years	3	1	full time	Bac + 3	married/free union	Over 36.000 €	Technician and associate professional		100 to 499 people	Industry	143	35	Standard duration (Less than 39h)	never	never	never	Individual office	30	16 to 30 minutes	1 day per week	never	23	disagree	agree	agree	disagree	agree	agree	agree	agree	agree	disagree	agree	disagree	agree	agree	disagree	disagree	disagree	agree	agree	agree	agree	disagree	agree	agree
1.1685	woman	32	25 to 34 years	3	1	full time	Bac + 2	En union libre	under 15.000 €	Technician and associate professional		9 people or less	other services	120	35	Standard duration (Less than 39h)	rarely	never	never	Individual office	30	16 to 30 minutes	no	1 period	15	agree	agree	fully agree	agree	agree	fully agree	fully disagree	fully agree	fully agree	agree	fully disagree	fully disagree	agree	disagree	fully disagree	fully agree	disagree	agree	agree	agree	fully agree	fully agree	disagree	fully disagree
0.812465	man	50	45 to 59 years	3	1	full time	< baccalaureate degree	married/free union		Senior managers		10 to 49 people	trading	4	45	Long duration (39 to 50h)	rarely	never	Very often	other	270	>1h30	more than one day a week	never	8	disagree	disagree	agree	fully agree	agree	fully agree	disagree	disagree	agree	agree	disagree	disagree	agree	disagree	fully disagree	fully agree	disagree	agree	disagree	fully agree	agree	agree	disagree	disagree
0.908675	woman	50	45 to 59 years	3	2	part time	Bac + 3	alone	under 15.000 €	Service and office worker		100 to 499 people	other services	4	22	Standard duration (Less than 39h)	Very often	rarely	often	external site	25	16 to 30 minutes	1 day per week	>4	2	disagree	agree	agree	fully disagree	agree	agree	disagree	disagree	disagree	fully agree	fully agree	agree	agree	disagree	disagree	disagree	disagree	agree	fully disagree	agree	agree	disagree	disagree	disagree
1.03806	man	51	45 to 59 years	1	none	self employed	< baccalaureate degree	alone	under 15.000 €		Craftsman, shopkeeper, entrepreneur	9 people or less	trading	24	60	Very Long duration (More than50h)	Very often	often	Very often	at home	0	<15 minutes		2 to 4 periods	16	fully disagree	fully disagree		fully agree		fully agree		fully agree	agree	agree	fully agree	fully disagree	fully agree	disagree	fully disagree		fully disagree	agree	fully agree	fully agree	fully agree		fully agree
0.362558	man	31	25 to 34 years	3	1	full time	Bac + 3	married/free union	Over 36.000 €	Senior managers		500 people or more	trading	13	45	Long duration (39 to 50h)	never	never	rarely	open space	15	<15 minutes	no	never	8	disagree	disagree	fully agree	fully agree	fully agree	fully agree	disagree	agree	fully agree	disagree	disagree	fully disagree	fully agree	fully disagree	fully disagree	agree	fully disagree	fully agree	agree	agree	fully agree	agree	agree	fully disagree
1.0232	woman	43	35 to 44 years	4	2	part time	Baccalaureate degree	married/free union	15 to 24.000 €	Service and office worker		10 to 49 people	other services	240	30	Standard duration (Less than 39h)	never	never	never	open space	30	16 to 30 minutes	no	never	2	disagree	disagree	disagree	disagree	disagree	disagree	disagree	agree	agree	agree	fully agree	disagree	disagree	agree	agree	disagree	agree	disagree	disagree	agree	agree	disagree	disagree	disagree
1.0029	man	27	25 to 34 years	2	none	full time	Bac + 3	En union libre	24 to 36.000 €	Technician and associate professional		50 to 99 people	Insurance and real estate	59	45	Long duration (39 to 50h)	rarely	never	never	Commercial permises	60	46 to 60 minutes	1 day per week	never	1	agree	agree	agree	agree	agree	agree	agree	agree	agree	agree	agree	disagree	agree	agree	agree	agree	agree	agree	agree	agree	agree	agree	agree	agree
0.791819	man	43	35 to 44 years	4	2	full time	Bac + 3	married/free union	Over 36.000 €	Service and office worker		100 to 499 people	other services	192	40	Long duration (39 to 50h)	often	often	often	other	60	46 to 60 minutes	no	never	21	disagree	fully agree	disagree	fully disagree	disagree	agree	disagree	disagree	agree	agree	disagree	agree	agree	disagree	agree	agree	fully agree	agree	fully agree	disagree	fully disagree	disagree	agree	fully disagree
1.60161	woman	55	45 to 59 years	4	none	full time	< baccalaureate degree	alone	15 to 24.000 €	Workers		10 to 49 people	Industry	182	35	Standard duration (Less than 39h)	rarely	never	often	production or workshop	70	1h to 1h30	no	never	65	fully disagree	fully disagree	fully disagree	fully disagree	fully disagree	agree	disagree	fully disagree	fully disagree	fully disagree	disagree	fully disagree	agree	fully disagree	fully disagree	fully disagree	fully agree	fully disagree	fully disagree	fully disagree	fully disagree	fully disagree	fully disagree	fully disagree
0.938449	woman	54	45 to 59 years	2	none	part time	Baccalaureate degree	alone	under 15.000 €	Service and office worker		100 to 499 people	other services	24	35	Standard duration (Less than 39h)	Very often	never	Very often	other	10	<15 minutes	no	2 to 4 periods	46	disagree	fully agree	fully disagree	fully disagree	disagree	disagree	fully disagree	agree	agree	agree	fully agree	fully agree	fully disagree	agree	fully agree	disagree	fully disagree	disagree	fully agree	agree	disagree	fully disagree	agree	agree
0.72966	man	51	45 to 59 years	2	none	self employed	< baccalaureate degree	married/free union	Over 36.000 €		Craftsman, shopkeeper, entrepreneur		building	300	45	Long duration (39 to 50h)	rarely	never	rarely	at customers	120	>1h30	no	never	14	disagree	disagree		fully agree		agree		agree	agree	fully agree	agree	disagree	agree	disagree	disagree		disagree	fully agree	agree	fully agree	agree		agree
1.28466	woman	32	25 to 34 years	2	none	part time	Bac + 3	married/free union	15 to 24.000 €	Service and office worker		100 to 499 people	Education, health and social work	12	20	Standard duration (Less than 39h)	often	never	often	at customers	25	16 to 30 minutes	more than one day a week	2 to 4 periods	63	fully agree	disagree	fully agree	fully disagree	disagree	agree	disagree	fully disagree	disagree	fully agree	fully disagree	disagree	disagree	fully agree	fully disagree	agree	fully disagree	agree	agree	disagree	agree	fully disagree	disagree	agree
0.970245	woman	49	45 to 59 years	4	1	full time	Bac + 3	En union libre	Over 36.000 €	Senior managers		500 people or more	Education, health and social work	306	45	Long duration (39 to 50h)	often	never	rarely	at home	30	16 to 30 minutes		never	20	fully disagree	agree	fully disagree	fully disagree	disagree	agree	disagree	agree	agree	fully agree	agree	agree	disagree	fully agree	disagree	disagree	fully disagree	fully disagree	disagree	agree	disagree	disagree	fully agree	disagree
1.51798	woman	42	35 to 44 years	2	none	full time	Bac + 3	En union libre	24 to 36.000 €	Technician and associate professional		9 people or less	Insurance and real estate	132	35	Standard duration (Less than 39h)	never	never	never	Individual office	40	31 to 45 minutes	no	2 to 4 periods	11	disagree	disagree	agree	agree	agree	agree	fully disagree	disagree	fully agree	fully disagree	disagree	agree	agree	fully disagree	fully disagree	agree	fully disagree	agree	disagree	agree	agree	agree	disagree	fully disagree
1.05754	man	53	45 to 59 years	4	2	full time	< baccalaureate degree	married/free union	24 to 36.000 €	Workers		10 to 49 people	Transports	276	42	Long duration (39 to 50h)	often	Very often	Very often	other	390	>1h30	more than one day a week	2 to 4 periods	26	disagree	fully agree	disagree	disagree	fully agree	disagree	disagree	fully agree	fully agree	fully agree	fully agree	fully agree	disagree	disagree	fully agree	disagree	fully agree	fully agree	fully agree	disagree	fully agree	disagree	fully agree	disagree
1.47849	man	47	45 to 59 years	3	2	self employed	Bac + 3	alone	15 to 24.000 €		Senior managers		other services	192	40	Long duration (39 to 50h)	often	often	Very often	at home	0	<15 minutes		2 to 4 periods	0	fully disagree	fully disagree		fully agree		agree		agree	fully disagree	agree	fully agree	disagree	agree	agree	disagree		fully disagree	fully disagree	fully agree	agree	fully agree		agree
0.73989	man	36	35 to 44 years	3	1	full time	Baccalaureate degree	En union libre	Over 36.000 €	Service and office worker		50 to 99 people	building	66	45	Long duration (39 to 50h)	rarely	rarely	often	open space	20	16 to 30 minutes	no	1 period	9	agree	fully agree	agree	disagree	agree	agree	agree	agree	fully agree	disagree	fully agree	agree	fully agree	fully agree	fully disagree	disagree	fully agree	disagree	agree	fully agree	disagree	disagree	agree	agree
0.998466	man	57	45 to 59 years	3	none	full time	< baccalaureate degree	married/free union		Workers		100 to 499 people	Industry	25	35	Standard duration (Less than 39h)	never	never	rarely	other	30	16 to 30 minutes	no	1 period	0	agree	agree	agree	agree	agree	agree	agree	agree	agree	agree	agree	agree	agree	agree	agree	agree	agree	agree	agree	agree	agree	agree	agree	agree
0.4724	woman	44	35 to 44 years	4	2	part time	Baccalaureate degree	married/free union		Service and office worker		500 people or more	other services	197	30	Standard duration (Less than 39h)	never	never	never	Individual office	55	46 to 60 minutes	no	1 period	9	agree	agree	agree	agree	disagree	disagree	agree	agree	disagree	disagree	disagree	disagree	disagree	agree	disagree	agree	agree	disagree	disagree	disagree	agree	agree	agree	disagree
0.672768	man	62	60 years and more	2	none	full time	< baccalaureate degree	married/free union	Over 36.000 €	Technician and associate professional		50 to 99 people	Transports	168	50	Long duration (39 to 50h)	rarely	rarely	Very often	Individual office	300	>1h30	no	1 period	9	agree	fully agree	agree	disagree	disagree	disagree	disagree	agree	agree	fully agree	agree	agree	agree	agree	agree	fully disagree	agree	disagree	agree	agree	disagree	fully agree	agree	agree
0.773111	man	47	45 to 59 years	5 and more	2	full time	Baccalaureate degree	alone	15 to 24.000 €	Service and office worker		100 to 499 people	Education, health and social work	192	36	Standard duration (Less than 39h)	Very often	Very often	Very often	other	30	16 to 30 minutes	no	2 to 4 periods	10	disagree	agree	disagree	agree	agree	agree	fully disagree	disagree	agree	disagree	disagree	fully agree	agree	agree	disagree	agree	fully disagree	agree	fully agree	agree	agree	disagree	agree	disagree
0.37339	woman	50	45 to 59 years	4	2	full time	Baccalaureate degree	married/free union	Over 36.000 €	Service and office worker		500 people or more	Transports	204	75	Very Long duration (More than50h)	Very often	Very often	Very often	other	180	>1h30	no	1 period	9	agree	agree	disagree	fully disagree	agree	disagree	disagree	disagree	agree	agree	disagree	fully agree	disagree	disagree	disagree	disagree	agree	agree	agree	disagree	disagree	disagree	disagree	disagree
0.30894	man	41	35 to 44 years	1	none	full time	Bac + 2	alone	15 to 24.000 €	Technician and associate professional		500 people or more	other services	103	40	Long duration (39 to 50h)	never	often	rarely	open space	40	31 to 45 minutes	no	never	39	disagree	fully agree	fully disagree	fully disagree	fully disagree	fully disagree	fully disagree	fully agree	fully disagree	fully agree	fully disagree	fully agree	fully disagree	fully disagree	fully agree	fully disagree	fully agree	fully disagree	agree	fully disagree	fully disagree	disagree	fully disagree	fully disagree
0.991166	woman	48	45 to 59 years	2	none	full time	Baccalaureate degree	married/free union	Over 36.000 €	Service and office worker		500 people or more	Education, health and social work	3	39	Long duration (39 to 50h)	never	never	never	Individual office	35	31 to 45 minutes	no	2 to 4 periods	9	disagree	disagree	disagree	agree	disagree	agree	disagree	agree	agree	agree	agree	disagree	agree	disagree	disagree	disagree	disagree	agree	disagree	agree	agree	agree	agree	disagree
1.19689	woman	47	45 to 59 years	4	1	full time	< baccalaureate degree	married/free union	Over 36.000 €	Technician and associate professional		10 to 49 people	building	120	40	Long duration (39 to 50h)	rarely	never	never	production or workshop	15	<15 minutes	no	never	31	fully disagree	fully agree	fully disagree	fully agree	disagree	agree	fully agree	fully agree	fully agree	fully agree	fully agree	fully disagree	fully agree	disagree	fully agree	fully disagree	fully disagree	fully disagree	fully agree	fully agree	agree	fully agree	fully agree	fully agree
0.818313	man	43	35 to 44 years	3	1	full time	Bac + 2	married/free union	24 to 36.000 €	Service and office worker		50 to 99 people	Education, health and social work	18	41	Long duration (39 to 50h)	never	never	rarely	flex office	30	16 to 30 minutes	no	never	11	fully disagree	disagree	disagree	agree	agree	agree	fully disagree	disagree	fully agree	agree	disagree	fully disagree	agree	agree	fully disagree	agree	disagree	fully agree	disagree	fully agree	agree	disagree	disagree	disagree
0.773111	man	57	45 to 59 years	2	none	part time	< baccalaureate degree	married/free union	15 to 24.000 €	Service and office worker		9 people or less	other services	120	25	Standard duration (Less than 39h)	often	never	never	external site	4	<15 minutes	no	2 to 4 periods	56	agree	agree	fully disagree	fully disagree	fully disagree	disagree	disagree	fully disagree	fully agree	fully agree	disagree	agree	fully disagree	fully agree	fully agree	fully disagree	fully disagree	fully disagree	disagree	agree	fully disagree	fully disagree	disagree	disagree
0.755593	man	51	45 to 59 years	3	1	part time	< baccalaureate degree	En union libre	Over 36.000 €	Technician and associate professional		10 to 49 people	Education, health and social work	18	20	Standard duration (Less than 39h)	never	never	never	Individual office	10	<15 minutes	no	2 to 4 periods	15	fully disagree	disagree	fully agree	fully agree	fully agree	fully agree	fully disagree	fully disagree	fully agree	fully agree	fully disagree	agree	fully agree	agree	fully disagree	fully agree	fully disagree	fully agree	fully disagree	fully agree	agree	disagree	fully disagree	fully disagree
0.865138	man	31	25 to 34 years	3	none	part time	Bac + 2	alone	15 to 24.000 €	Service and office worker		50 to 99 people	other services	8	20	Standard duration (Less than 39h)	never	never	rarely	open space	80	1h to 1h30	a half day per week	2 to 4 periods	32	agree	fully agree	fully disagree	fully disagree	agree	disagree	agree	agree	fully disagree	fully agree	disagree	agree	fully disagree	fully agree	disagree	disagree	agree	disagree	disagree	fully disagree	disagree	fully disagree	agree	agree
0.983018	woman	42	35 to 44 years	3	1	full time	Bac + 2	married/free union	24 to 36.000 €	Service and office worker		50 to 99 people	trading	108	38	Standard duration (Less than 39h)	never	never	never	open space	20	16 to 30 minutes	no	2 to 4 periods	39	agree	agree	fully disagree	fully disagree	fully disagree	disagree	fully disagree	fully agree	fully agree	fully agree	agree	fully disagree	fully disagree	agree	agree	fully disagree	fully disagree	fully disagree	disagree	fully disagree	fully agree	fully disagree	disagree	fully agree
0.928012	man	27	25 to 34 years	2	none	full time	Baccalaureate degree	En union libre	15 to 24.000 €	Service and office worker		10 to 49 people	other services	60	40	Long duration (39 to 50h)	Very often	never	Very often	at customers	600	>1h30	more than one day a week	never	5	agree	agree	agree	agree	agree	agree	agree	agree	agree	agree	agree	agree	agree	agree	agree	agree	agree	agree	agree	agree	agree	agree	disagree	agree
0.297434	man	50	45 to 59 years	4	1	full time	< baccalaureate degree	married/free union	24 to 36.000 €	Service and office worker		500 people or more	Transports	386	35	Standard duration (Less than 39h)	Very often	never	never	external site	300	>1h30	no	never	44	disagree	fully agree	disagree	disagree	fully disagree	agree	disagree	fully agree	agree	agree	disagree	disagree	agree	agree	agree	fully disagree	fully agree	disagree	agree	agree	disagree	disagree	agree	agree
0.368226	man	38	35 to 44 years	3	none	full time	Bac + 2	En union libre	Over 36.000 €	Technician and associate professional		500 people or more	other services	132	39	Long duration (39 to 50h)	never	never	Very often	Individual office	90	1h to 1h30	no	never	13	agree	agree	agree	fully agree	fully agree	agree	agree	fully agree	agree	agree	agree	fully agree	agree	fully agree	agree	agree	fully agree	agree	agree	fully agree	agree	agree	agree	fully agree
1.30721	man	28	25 to 34 years	3	1	full time	< baccalaureate degree	En union libre	15 to 24.000 €	Workers		10 to 49 people	other services	9	35	Standard duration (Less than 39h)	never	rarely	often	external site	30	16 to 30 minutes	no	1 period	46	disagree	disagree	fully disagree	fully disagree	fully disagree	disagree	disagree	agree	agree	fully agree	disagree	fully disagree	disagree	agree	fully agree	disagree	fully disagree	disagree	agree	agree	disagree	fully disagree	agree	fully disagree
1.07639	woman	57	45 to 59 years	1	none	part time	< baccalaureate degree	alone	15 to 24.000 €	Service and office worker		100 to 499 people	Transports	108	32	Standard duration (Less than 39h)	never	never	never	Individual office	25	16 to 30 minutes	no	never	18	agree	agree	agree	disagree	agree	agree	disagree	disagree	fully agree	agree	disagree	disagree	agree	disagree	agree	agree	fully disagree	agree	disagree	agree	fully agree	agree	disagree	disagree
1.28466	woman	27	25 to 34 years	1	none	full time	Baccalaureate degree	alone	15 to 24.000 €	Service and office worker		100 to 499 people	trading	4	35	Standard duration (Less than 39h)	never	never	never	Individual office	60	46 to 60 minutes	a half day per week	never	3	agree	agree	agree	agree	agree	agree	disagree	agree	agree	agree	agree	agree	agree	agree	agree	agree	agree	agree	agree	agree	agree	agree	disagree	fully disagree
0.366819	man	35	35 to 44 years	4	1	full time	Bac + 3	alone	15 to 24.000 €	Senior managers		500 people or more	other services	48	38	Standard duration (Less than 39h)	rarely	rarely	rarely	Individual office	40	31 to 45 minutes	1 day per week	1 period	23	agree	agree	agree	agree	agree	agree	agree	agree	fully agree	fully agree	agree	agree	agree	agree	agree	agree	agree	agree	disagree	agree	agree	agree	agree	agree
0.818313	man	40	35 to 44 years	4	2	full time	Bac + 2	married/free union	Over 36.000 €	Service and office worker		50 to 99 people	other services	24	40	Long duration (39 to 50h)	Very often	often	often	open space	60	46 to 60 minutes	no	never	9	fully disagree	fully agree	disagree	agree	agree	disagree	fully disagree	fully agree	fully agree	agree	fully agree	fully agree	agree	disagree	disagree	agree	disagree	agree	fully agree	fully agree	disagree	fully agree	fully agree	disagree
0.972964	woman	46	45 to 59 years	5 and more	2	part time	Bac + 3	married/free union	Over 36.000 €	Technician and associate professional		500 people or more	Education, health and social work	240	40	Long duration (39 to 50h)	Very often	rarely	Very often	other	50	46 to 60 minutes	no	never	50	fully disagree	fully agree	fully disagree	fully disagree	fully disagree	disagree	fully agree	fully agree	disagree	fully agree	fully agree	fully agree	fully disagree	fully agree	agree	fully disagree	fully disagree	fully agree	fully agree	disagree	fully disagree	fully disagree	agree	agree
0.783203	man	57	45 to 59 years	4	1	full time	Bac + 3	married/free union	24 to 36.000 €	Technician and associate professional		500 people or more	Education, health and social work	252	42	Long duration (39 to 50h)	rarely	never	rarely	Individual office	90	1h to 1h30	a half day per week	1 period	0	disagree	agree	agree	agree	disagree	agree	disagree	agree	fully agree	agree	disagree	disagree	agree	disagree	disagree	agree	agree	agree	agree	agree	agree	agree	agree	disagree
1.35625	woman	29	25 to 34 years	3	1	full time	Bac + 3	married/free union	Over 36.000 €	Service and office worker		100 to 499 people	other services	45	39	Long duration (39 to 50h)	never	never	never	open space	70	1h to 1h30	no	>4	22	disagree	agree	agree	disagree	agree	agree	fully disagree	agree	agree	agree	disagree	fully disagree	agree	disagree	fully disagree	fully agree	fully agree	agree	disagree	agree	agree	agree	disagree	fully disagree
0.968907	man	45	45 to 59 years	3	1	full time	Baccalaureate degree	married/free union		Workers		100 to 499 people	trading	240	39	Long duration (39 to 50h)	rarely	never	never	production or workshop	40	31 to 45 minutes	no	1 period	2	agree	agree	disagree	disagree	disagree	disagree	disagree	disagree	agree	agree	agree	disagree	disagree	disagree	agree	disagree	disagree	disagree	agree	disagree	agree	disagree	disagree	agree
0.45368	woman	31	25 to 34 years	1	none	full time	Bac + 3	En union libre	24 to 36.000 €	Senior managers		500 people or more	other services	1	45	Long duration (39 to 50h)	never	never	rarely	open space	5	<15 minutes	no	2 to 4 periods	23	disagree	agree	disagree	disagree	disagree	agree	disagree	agree	agree	agree	agree	disagree	agree	disagree	disagree	agree	fully disagree	agree	disagree	agree	agree	disagree	agree	disagree
1.23146	woman	30	25 to 34 years	2	none	full time	Bac + 2	married/free union	24 to 36.000 €	Service and office worker		10 to 49 people	Education, health and social work	10	39	Long duration (39 to 50h)	rarely	never	rarely	Individual office	30	16 to 30 minutes	no	2 to 4 periods	21	disagree	disagree	agree	agree	agree	agree	disagree	agree	agree	agree	agree	fully agree	agree	agree	disagree	agree	disagree	agree	agree	agree	agree	disagree	fully agree	disagree
0.836756	man	37	35 to 44 years	5 and more	3	full time	Bac + 3	married/free union	Over 36.000 €	Senior managers		10 to 49 people	Industry	21	40	Long duration (39 to 50h)	never	never	never	open space	40	31 to 45 minutes	no	2 to 4 periods	9	disagree	agree	agree	fully agree	disagree	agree	disagree	agree	fully agree	fully agree	disagree	disagree	agree	disagree	disagree	disagree	disagree	agree	disagree	agree	agree	disagree	disagree	disagree
0.346125	man	51	45 to 59 years	3	1	full time	< baccalaureate degree	married/free union		Technician and associate professional		500 people or more	Industry	240	45	Long duration (39 to 50h)	often	never	never	flex office	140	>1h30	no	1 period	23	disagree	agree	fully disagree	fully disagree	disagree	agree	agree	fully agree	agree	agree	agree	disagree	disagree	fully agree	agree	disagree	agree	agree	agree	agree	agree	disagree	fully agree	disagree
0.994262	woman	46	45 to 59 years	3	2	full time	Bac + 2	alone	15 to 24.000 €	Service and office worker		9 people or less	other services	132	35	Standard duration (Less than 39h)	never	never	never	Individual office	10	<15 minutes	no	2 to 4 periods	61	agree	fully agree	fully disagree	fully disagree	fully disagree	disagree	fully agree	disagree	fully agree	fully agree	disagree	disagree	fully disagree	fully agree	disagree	fully disagree	fully disagree	fully disagree	disagree	agree	fully disagree	fully disagree	fully agree	disagree
1.03221	woman	43	35 to 44 years	3	1	full time	Bac + 2	married/free union	Over 36.000 €	Technician and associate professional		500 people or more	Education, health and social work	30	39	Long duration (39 to 50h)	often	never	never	Individual office	10	<15 minutes	no	never	8	disagree	agree	agree	disagree	disagree	fully agree	disagree	agree	agree	agree	agree	disagree	agree	agree	disagree	disagree	fully disagree	agree	fully disagree	fully agree	agree	agree	agree	agree
1.28382	woman	33	25 to 34 years	4	2	full time	Bac + 3	married/free union	Over 36.000 €	Senior managers		50 to 99 people	trading	38	45	Long duration (39 to 50h)	rarely	never	rarely	open space	35	31 to 45 minutes	no	1 period	14	disagree	fully agree	disagree	agree	disagree	disagree	fully disagree	fully agree	agree	disagree	fully agree	agree	agree	fully agree	agree	fully disagree	fully disagree	disagree	agree	agree	disagree	disagree	agree	disagree
0.905311	man	34	25 to 34 years	1	none	full time	Baccalaureate degree	alone	15 to 24.000 €	Technician and associate professional		10 to 49 people	Education, health and social work	216	45	Long duration (39 to 50h)	never	never	never	Individual office	15	<15 minutes	no	1 period	8	fully disagree	disagree	agree	agree	agree	fully agree	fully disagree	fully agree	fully agree	disagree	agree	disagree	fully agree	disagree	fully disagree	agree	fully disagree	fully agree	disagree	fully agree	fully agree	agree	disagree	disagree
0.392185	woman	51	45 to 59 years	2	none	full time	Bac + 3	married/free union		Technician and associate professional		500 people or more	Insurance and real estate	312	35	Standard duration (Less than 39h)	never	never	never	open space	30	16 to 30 minutes	no	never	4	fully disagree	fully agree	disagree	agree	agree	agree	disagree	agree	agree	fully agree	disagree	disagree	agree	disagree	disagree	agree	fully disagree	agree	agree	agree	agree	fully disagree	agree	disagree
1.26497	woman	52	45 to 59 years	2	none	full time	< baccalaureate degree	married/free union	Over 36.000 €	Workers		50 to 99 people	Industry	389	37	Standard duration (Less than 39h)	rarely	rarely	Very often	production or workshop	10	<15 minutes	no	1 period	29	disagree	fully agree	fully disagree	fully disagree	fully disagree	agree	agree	disagree	agree	agree	disagree	disagree	agree	disagree	disagree	disagree	fully disagree	agree	fully agree	agree	agree	agree	agree	fully disagree
0.994262	woman	53	45 to 59 years	3	none	part time	< baccalaureate degree	married/free union	15 to 24.000 €	Service and office worker		10 to 49 people	other services	108	15	Standard duration (Less than 39h)	rarely	never	Very often	other	5	<15 minutes	no	>4	47	disagree	disagree	fully disagree	fully disagree	agree	agree	fully disagree	fully disagree	agree	agree	disagree	fully disagree	disagree	disagree	disagree	disagree	fully disagree	agree	agree	agree	agree	disagree	disagree	fully disagree
0.400485	woman	44	35 to 44 years	2	none	full time	Bac + 3	married/free union	Over 36.000 €	Senior managers		500 people or more	building	60	65	Very Long duration (More than50h)	often	rarely	often	Individual office	120	>1h30	no	2 to 4 periods	15	fully disagree	fully agree	agree	agree	agree	fully agree	disagree	fully agree	fully agree	agree	agree	disagree	agree	agree	disagree	agree	disagree	agree	fully agree	agree	fully agree	agree	fully agree	disagree
3.86994	man	21	18 to 24 years	1	none	full time	Baccalaureate degree	alone	15 to 24.000 €	Service and office worker		9 people or less	trading	22	41	Long duration (39 to 50h)	Very often	never	often	Commercial permises	7	<15 minutes	no	never	20	agree	agree	agree	agree	agree	agree	disagree	fully disagree	agree	agree	disagree	disagree	fully agree	disagree	disagree	fully agree	fully disagree	fully agree	disagree	fully agree	disagree	disagree	disagree	disagree
1.00235	woman	54	45 to 59 years	3	1	full time	Bac + 3	alone		Senior managers		100 to 499 people	Education, health and social work	360	20	Standard duration (Less than 39h)	Very often	never	often	other	120	>1h30	no	never	16	disagree	agree	disagree	disagree	disagree	fully disagree	fully disagree	agree	agree	disagree	agree	agree	disagree	disagree	fully agree	disagree	fully agree	disagree	agree	disagree	fully disagree	disagree	agree	disagree
0.862275	man	44	35 to 44 years	1	none	full time	Bac + 3	alone	15 to 24.000 €	Technician and associate professional		10 to 49 people	trading	50	40	Long duration (39 to 50h)	rarely	rarely	rarely	at customers	30	16 to 30 minutes	more than one day a week	1 period	7	agree	disagree	fully agree	disagree	disagree	agree	fully disagree	agree	agree	agree	fully disagree	fully disagree	fully agree	disagree	disagree	agree	fully disagree	agree	disagree	fully agree	fully agree	disagree	agree	fully disagree
2.08507	woman	40	35 to 44 years	3	1	full time	Baccalaureate degree	married/free union	24 to 36.000 €	Workers		9 people or less	other services	209	37	Standard duration (Less than 39h)	never	never	Very often	Individual office	90	1h to 1h30	no	never	55	disagree	agree	fully disagree	disagree	disagree	agree	disagree	fully agree	fully agree	fully agree	agree	disagree	fully disagree	disagree	disagree	disagree	fully disagree	disagree	agree	fully agree	agree	fully disagree	fully agree	disagree
1.26243	man	34	25 to 34 years	3	1	full time	Baccalaureate degree	married/free union	under 15.000 €	Workers		10 to 49 people	other services	2	39	Long duration (39 to 50h)	never	never	often	at customers	210	>1h30	no	2 to 4 periods	8	disagree	fully agree	agree	agree	fully agree	agree	fully disagree	disagree	agree	disagree	fully disagree	fully disagree	fully agree	fully disagree	fully disagree	agree	agree	agree	fully agree	fully agree	fully agree	agree	disagree	fully disagree
0.884632	man	55	45 to 59 years	2	none	part time	< baccalaureate degree	En union libre	under 15.000 €	Service and office worker		50 to 99 people	other services	16	20	Standard duration (Less than 39h)	never	never	Very often	external site	90	1h to 1h30	no	2 to 4 periods	29	agree	fully disagree	fully disagree	fully disagree	fully disagree	agree	fully disagree	fully disagree	fully agree	fully agree	fully disagree	fully disagree	agree	fully disagree	disagree	agree	agree	disagree	fully disagree	agree	disagree	fully disagree	fully disagree	fully disagree
0.948208	woman	38	35 to 44 years	2	none	self employed	Baccalaureate degree	married/free union	Over 36.000 €		Craftsman, shopkeeper, entrepreneur	9 people or less	other services	24	40	Long duration (39 to 50h)	often	never	rarely	other	0	<15 minutes	no	2 to 4 periods	8	fully disagree	fully disagree		fully agree		fully agree		agree	fully agree	fully agree	fully disagree	fully disagree	fully agree	agree	fully disagree		fully disagree	fully agree	disagree	fully agree	fully agree		agree
0.928012	man	28	25 to 34 years	3	1	full time	Bac + 2	En union libre	Over 36.000 €	Service and office worker		10 to 49 people	Transports	84	38	Standard duration (Less than 39h)	never	never	often	open space	90	1h to 1h30	no	never	38	fully agree	agree	agree	agree	disagree	agree	fully agree	agree	disagree	disagree	agree	disagree	fully agree	agree	agree	agree	agree	disagree	disagree	agree	agree	agree	disagree	disagree
0.991166	woman	49	45 to 59 years	1	none	full time	Bac + 2	alone	under 15.000 €	Service and office worker		100 to 499 people	other services	120	35	Standard duration (Less than 39h)	rarely	never	rarely	open space	60	46 to 60 minutes	no	2 to 4 periods	5	disagree	fully agree	agree	agree	fully agree	agree	fully disagree	agree	fully agree	fully disagree	agree	fully agree	fully agree	agree	fully disagree	agree	disagree	agree	disagree	fully agree	fully agree	fully agree	agree	disagree
0.974908	man	27	25 to 34 years	2	none	full time	Bac + 3	married/free union	24 to 36.000 €	Technician and associate professional		10 to 49 people	Industry	9	38	Standard duration (Less than 39h)	never	never	never	Individual office	25	16 to 30 minutes	no	1 period	8	fully disagree	disagree	agree	agree	disagree	agree	fully disagree	agree	fully agree	disagree	disagree	disagree	agree	agree	disagree	agree	agree	fully agree	agree	agree	fully agree	agree	disagree	disagree
0.582846	woman	31	25 to 34 years	4	2	self employed	Bac + 3	married/free union	24 to 36.000 €		Technician and associate professional Service and office worker Workers	9 people or less	other services	96	50	Long duration (39 to 50h)	never	never	rarely	at home	0	<15 minutes		>4	15	disagree	agree		agree		fully agree		disagree	agree	fully agree	disagree	disagree	agree	disagree	disagree		fully disagree	agree	agree	agree	fully agree		disagree
0.486533	woman	51	45 to 59 years	3	none	self employed	Baccalaureate degree	married/free union	24 to 36.000 €		Technician and associate professional Service and office worker Workers	9 people or less	other services	74	8	Standard duration (Less than 39h)	never	never	never	at customers	20	16 to 30 minutes	no	2 to 4 periods	9	agree	disagree		disagree		disagree		fully disagree	agree	agree	disagree	disagree	agree	disagree	disagree		disagree	disagree	disagree	disagree	agree		fully disagree
1.07219	woman	35	35 to 44 years	4	2	part time	Bac + 3	married/free union	24 to 36.000 €	Technician and associate professional		10 to 49 people	other services	14	30	Standard duration (Less than 39h)	never	never	never	Individual office	45	31 to 45 minutes	no	>4	40	fully disagree	agree	agree	fully agree	fully agree	fully agree	disagree	agree	fully agree	agree	fully agree	disagree	fully agree	disagree	fully disagree	fully agree	fully disagree	agree	agree	fully agree	agree	agree	agree	disagree
1.17998	woman	58	45 to 59 years	3	none	full time	Bac + 3	married/free union	Over 36.000 €	Service and office worker		10 to 49 people	Industry	300	40	Long duration (39 to 50h)	never	never	rarely	Individual office	45	31 to 45 minutes	no	2 to 4 periods	17	disagree	disagree	agree	fully agree	agree	fully agree	fully agree	agree	agree	disagree	disagree	agree	agree	fully disagree	fully disagree	fully agree	disagree	agree	disagree	fully agree	fully agree	disagree	agree	disagree
0.755593	man	51	45 to 59 years	4	2	full time	Bac + 2	married/free union	24 to 36.000 €	Technician and associate professional		50 to 99 people	Education, health and social work	36	40	Long duration (39 to 50h)	Very often	rarely	Very often	other	20	16 to 30 minutes	no	never	16	fully disagree	agree	disagree	disagree	disagree	agree	disagree	agree	agree	disagree	agree	agree	agree	agree	disagree	disagree	fully disagree	fully agree	agree	agree	disagree	agree	disagree	agree
1.22212	woman	43	35 to 44 years	3	1	full time	Bac + 3	alone	24 to 36.000 €	Technician and associate professional		500 people or more	other services	16	40	Long duration (39 to 50h)	never	rarely	often	other	60	46 to 60 minutes	no	never	17	fully disagree	agree	disagree	agree	disagree	agree	disagree	fully agree	agree	fully agree	fully agree	agree	agree	agree	disagree	fully disagree	disagree	fully agree	agree	fully agree	agree	fully agree	agree	disagree
1.7705	man	51	45 to 59 years	3	1	full time	< baccalaureate degree	En union libre	15 to 24.000 €	Workers		9 people or less	building	180	39	Long duration (39 to 50h)	never	never	rarely	external site	60	46 to 60 minutes	no	>4	11	disagree	disagree	disagree	disagree	disagree	disagree	agree	disagree	disagree	fully agree	disagree	disagree	disagree	agree	disagree	disagree	disagree	agree	disagree	disagree	disagree	disagree	agree	agree
0.448361	woman	46	45 to 59 years	5 and more	3	full time	Bac + 3	married/free union	Over 36.000 €	Senior managers		500 people or more	building	120	45	Long duration (39 to 50h)	often	never	often	open space	60	46 to 60 minutes	more than one day a week	never	6	fully disagree	disagree	fully agree	fully agree	fully agree	agree	fully disagree	fully agree	fully agree	disagree	agree	disagree	fully agree	fully disagree	fully disagree	fully agree	disagree	agree	disagree	fully agree	fully agree	fully agree	agree	fully disagree
1.12486	man	51	45 to 59 years	5 and more	3	full time	< baccalaureate degree	married/free union	24 to 36.000 €	Technician and associate professional		9 people or less	other services	254	55	Very Long duration (More than50h)	Very often	rarely	often	external site	120	>1h30	no	1 period	38	disagree	disagree	disagree	agree	agree	agree	fully disagree	agree	disagree	disagree	agree	disagree	agree	disagree	disagree	disagree	disagree	agree	agree	agree	disagree	disagree	agree	disagree
0.968907	man	51	45 to 59 years	1	none	full time	< baccalaureate degree	alone	15 to 24.000 €	Workers		100 to 499 people	other services	337	35	Standard duration (Less than 39h)	never	never	never	other	20	16 to 30 minutes	no	never	9	disagree	disagree	fully disagree	disagree	disagree	agree	disagree	fully disagree	agree	agree	disagree	fully disagree	disagree	disagree	disagree	disagree	fully disagree	agree	disagree	disagree	agree	disagree	disagree	disagree
0.486533	woman	48	45 to 59 years	3	none	self employed	Bac + 2	married/free union	under 15.000 €		Technician and associate professional Service and office worker Workers	9 people or less	Industry	242	35	Standard duration (Less than 39h)	never	never	never	Individual office	20	16 to 30 minutes	no	1 period	19	disagree	disagree		disagree		agree		agree	agree	agree	agree	disagree	disagree	disagree	disagree		disagree	agree	agree	disagree	agree		disagree
0.317049	man	35	35 to 44 years	4	2	part time	Bac + 2	married/free union	24 to 36.000 €	Service and office worker		500 people or more	Transports	138	28	Standard duration (Less than 39h)	often	never	rarely	open space	50	46 to 60 minutes	no	never	37	fully agree	agree	fully disagree	fully disagree	agree	agree	disagree	agree	disagree	agree	disagree	agree	disagree	disagree	agree	agree	fully agree	agree	agree	disagree	disagree	disagree	disagree	disagree
0.823282	man	39	35 to 44 years	5 and more	3	full time	Bac + 3	married/free union	24 to 36.000 €	Service and office worker		10 to 49 people	other services	192	35	Standard duration (Less than 39h)	never	never	never	Commercial permises	60	46 to 60 minutes	no	1 period	19	disagree	agree	agree	agree	disagree	agree	fully disagree	agree	fully agree	disagree	disagree	agree	agree	disagree	disagree	agree	agree	agree	disagree	agree	agree	disagree	disagree	disagree
1.37227	woman	31	25 to 34 years	4	2	part time	Bac + 3	married/free union	Over 36.000 €	Senior managers		500 people or more	Education, health and social work	117	40	Long duration (39 to 50h)	Very often	never	never	other	30	16 to 30 minutes	no	never	27	disagree	disagree	disagree	disagree	disagree	disagree	disagree	agree	disagree	agree	fully agree	agree	disagree	fully agree	disagree	disagree	disagree	disagree	agree	agree	fully disagree	fully disagree	agree	agree
1.63452	man	65	60 years and more	3	none	full time	< baccalaureate degree	married/free union	24 to 36.000 €	Workers		9 people or less	trading	204	35	Standard duration (Less than 39h)	Very often	never	never	Commercial permises	45	31 to 45 minutes	no	never	4	fully disagree	fully agree	agree	agree	fully agree	fully agree	fully disagree	fully agree	agree	fully agree	agree	fully agree	agree	disagree	fully disagree	agree	fully disagree	agree	fully agree	agree	agree	agree	fully agree	disagree
1.15235	woman	51	45 to 59 years	4	2	full time	Bac + 3	En union libre	24 to 36.000 €	Technician and associate professional		50 to 99 people	Education, health and social work	128	30	Standard duration (Less than 39h)	never	never	often	Individual office	60	46 to 60 minutes	no	never	0	fully disagree	agree	agree	agree	agree	agree	fully disagree	disagree	agree	fully disagree	agree	disagree	agree	fully disagree	fully disagree	agree	agree	agree	disagree	agree	agree	agree	agree	disagree
0.478279	woman	42	35 to 44 years	2	none	full time	Bac + 2	En union libre	Over 36.000 €	Technician and associate professional		500 people or more	other services	206	35	Standard duration (Less than 39h)	Very often	never	Very often	other	60	46 to 60 minutes	no	never	6	fully disagree	fully agree	agree	disagree	disagree	fully agree	fully disagree	disagree	fully agree	disagree	fully disagree	agree	fully agree	agree	fully disagree	fully agree	agree	fully agree	agree	fully agree	agree	agree	fully disagree	fully disagree
0.368226	man	39	35 to 44 years	4	2	full time	Bac + 3	married/free union	Over 36.000 €	Technician and associate professional		500 people or more	Education, health and social work	192	35	Standard duration (Less than 39h)	never	never	never	Individual office	60	46 to 60 minutes	no	never	6	disagree	agree	agree	disagree	disagree	disagree	disagree	agree	agree	disagree	agree	disagree	agree	agree	disagree	agree	disagree	agree	agree	agree	agree	disagree	disagree	disagree
0.290293	man	57	45 to 59 years	2	none	full time	< baccalaureate degree	married/free union	Over 36.000 €	Technician and associate professional		500 people or more	Industry	328	39	Long duration (39 to 50h)	never	Very often	never	other	20	16 to 30 minutes	no	1 period	36	agree	agree	disagree	fully disagree	disagree	fully disagree	disagree	disagree	fully agree	fully agree	disagree	disagree	fully disagree	disagree	fully agree	fully disagree	fully disagree	disagree	agree	disagree	agree	fully disagree	disagree	agree
0.739079	man	45	45 to 59 years	5 and more	3	full time	Bac + 3	married/free union	Over 36.000 €	Senior managers		100 to 499 people	trading	146	40	Long duration (39 to 50h)	rarely	never	rarely	open space	140	>1h30	no	never	10	disagree	fully agree	agree	agree	agree	agree	fully disagree	fully agree	agree	agree	fully agree	disagree	agree	fully agree	disagree	agree	fully agree	agree	fully agree	agree	agree	agree	agree	agree
1.30721	man	30	25 to 34 years	1	none	full time	Baccalaureate degree	alone	15 to 24.000 €	Workers		10 to 49 people	other services	6	7	Standard duration (Less than 39h)	never	never	rarely	other	50	46 to 60 minutes	no	1 period	12	agree	fully agree	fully agree	disagree	agree	disagree	fully disagree	disagree	agree	fully agree	fully disagree	disagree	agree	disagree	disagree	agree	fully disagree	agree	fully agree	fully agree	fully agree	agree	agree	disagree
1.19741	woman	28	25 to 34 years	2	none	full time	Bac + 3	married/free union	24 to 36.000 €	Senior managers		100 to 499 people	Education, health and social work	48	35	Standard duration (Less than 39h)	often	rarely	rarely	at home	30	16 to 30 minutes		never	17	disagree	fully agree	fully disagree	disagree	disagree	agree	fully disagree	disagree	fully agree	fully agree	disagree	fully agree	agree	fully disagree	fully disagree	agree	fully disagree	agree	disagree	agree	agree	fully disagree	agree	disagree
0.35956	man	34	25 to 34 years	2	none	full time	Baccalaureate degree	En union libre	15 to 24.000 €	Service and office worker		500 people or more	Insurance and real estate	15	35	Standard duration (Less than 39h)	never	never	never	open space	10	<15 minutes	no	2 to 4 periods	12	disagree	disagree	agree	agree	agree	agree	disagree	disagree	agree	disagree	disagree	disagree	agree	disagree	disagree	agree	fully disagree	fully agree	disagree	fully agree	agree	agree	disagree	disagree
1.45509	woman	45	45 to 59 years	3	2	full time	< baccalaureate degree	alone	under 15.000 €	Service and office worker		9 people or less	other services	14	35	Standard duration (Less than 39h)	never	never	never	other	20	16 to 30 minutes	no	>4	11	fully agree	fully agree	fully disagree	disagree	agree	disagree	fully disagree	agree	fully agree	agree	agree	fully disagree	disagree	fully disagree	agree	disagree	fully disagree	disagree	fully disagree	fully agree	disagree	disagree	fully disagree	fully disagree
0.299731	man	46	45 to 59 years	1	none	full time	Bac + 2	alone	Over 36.000 €	Senior managers		500 people or more	Transports	186	40	Long duration (39 to 50h)	rarely	often	often	Individual office	45	31 to 45 minutes	more than one day a week	never	8	agree	fully agree	agree	fully disagree	agree	fully agree	fully agree	agree	agree	disagree	fully disagree	fully agree	agree	fully agree	fully disagree	agree	agree	disagree	fully agree	agree	agree	agree	agree	disagree
1.73681	woman	33	25 to 34 years	3	1	full time	Bac + 3	En union libre		Service and office worker		9 people or less	trading	108	35	Standard duration (Less than 39h)	often	never	never	Commercial permises	5	<15 minutes	no	never	16	disagree	fully disagree	agree	agree	agree	agree	disagree	disagree	agree	agree	disagree	disagree	agree	disagree	disagree	agree	fully disagree	agree	disagree	agree	agree	agree	disagree	disagree
0.584497	woman	58	45 to 59 years	2	none	self employed	< baccalaureate degree	married/free union			Technician and associate professional Service and office worker Workers	9 people or less	other services	360	35	Standard duration (Less than 39h)	never	never	never	at home	0	<15 minutes		never	11	disagree	agree		disagree		agree		disagree	agree	agree	agree	disagree	agree	disagree	disagree		fully disagree	disagree	agree	agree	agree		disagree
0.932649	man	28	25 to 34 years	2	none	part time	Baccalaureate degree	En union libre		Service and office worker		10 to 49 people	Education, health and social work	24	20	Standard duration (Less than 39h)	Very often	never	Very often	at customers	600	>1h30	more than one day a week	1 period	4	disagree	disagree	agree	agree	disagree	agree	disagree	disagree	disagree	agree	agree	disagree	disagree	agree	disagree	disagree	agree	disagree	agree	agree	disagree	disagree	disagree	disagree
0.799727	man	40	35 to 44 years	4	2	full time	Bac + 3	married/free union	Over 36.000 €	Senior managers		10 to 49 people	Education, health and social work	180	45	Long duration (39 to 50h)	often	rarely	often	other	50	46 to 60 minutes	more than one day a week	never	48	disagree	disagree	agree	agree	agree	agree	fully disagree	agree	agree	disagree	agree	disagree	agree	disagree	disagree	agree	fully disagree	agree	disagree	agree	fully agree	agree	agree	disagree
1.0629	man	52	45 to 59 years	2	none	full time	Baccalaureate degree	married/free union		Workers		10 to 49 people	Transports	24	45	Long duration (39 to 50h)	rarely	never	often	at customers	15	<15 minutes	no	2 to 4 periods	23	agree	agree	disagree	disagree	disagree	agree	disagree	disagree	agree	agree	disagree	disagree	fully disagree	disagree	agree	disagree	agree	disagree	fully agree	agree	disagree	disagree	agree	fully disagree
0.857105	man	28	25 to 34 years	2	none	full time	Bac + 3	married/free union		Technician and associate professional		100 to 499 people	Industry	56	35	Standard duration (Less than 39h)	never	never	never	Individual office	15	<15 minutes	no	never	11	disagree	disagree	agree	agree	agree	agree	disagree	agree	agree	agree	agree	disagree	agree	disagree	disagree	agree	disagree	agree	agree	agree	agree	agree	agree	agree
0.290293	man	54	45 to 59 years	4	none	full time	Bac + 3	married/free union		Technician and associate professional		500 people or more	Education, health and social work	300	35	Standard duration (Less than 39h)	never	never	never	Individual office	60	46 to 60 minutes	no	never	8	fully disagree	agree	disagree	agree	agree	disagree	disagree	agree	agree	fully agree	agree	agree	agree	disagree	agree	disagree	fully agree	agree	agree	agree	agree	disagree	agree	disagree
0.745917	man	58	45 to 59 years	3	none	full time	< baccalaureate degree	married/free union	24 to 36.000 €	Service and office worker		50 to 99 people	Transports	264	35	Standard duration (Less than 39h)	often	never	never	production or workshop	15	<15 minutes	no	never	14	agree	fully agree	disagree	disagree	disagree	agree	disagree	disagree	agree	agree	disagree	fully disagree	agree	agree	disagree	disagree	disagree	agree	agree	agree	agree	fully agree	agree	disagree
1.1685	woman	28	25 to 34 years	1	none	full time	Bac + 3	alone	Over 36.000 €	Technician and associate professional		500 people or more	Education, health and social work	62	100	Very Long duration (More than50h)	often	often	often	Individual office	260	>1h30	1 day per week	2 to 4 periods	0	agree	agree	agree	agree	agree	agree	agree	agree	agree	agree	agree	agree	agree	agree	agree	agree	agree	agree	agree	agree	agree	agree	agree	agree
0.44447	woman	57	45 to 59 years	3	none	full time	< baccalaureate degree	alone	24 to 36.000 €	Service and office worker		500 people or more	Insurance and real estate	300	40	Long duration (39 to 50h)	never	never	never	Individual office	0	<15 minutes	no	1 period	5	agree	agree	disagree	disagree	agree	agree	disagree	fully disagree	fully agree	agree	disagree	disagree	agree	agree	disagree	agree	fully disagree	agree	disagree	disagree	agree	fully disagree	fully disagree	disagree
0.410551	man	59	45 to 59 years	3	1	part time	< baccalaureate degree	married/free union	under 15.000 €	Workers		500 people or more	Industry	384	10	Standard duration (Less than 39h)	never	never	never	other	10	<15 minutes	no	never	22	disagree	fully disagree	fully disagree	fully disagree	disagree	agree	fully disagree	fully disagree	agree	fully agree	fully disagree	disagree	agree	fully disagree	fully disagree	agree	fully disagree	fully agree	fully disagree	disagree	fully agree	fully disagree	disagree	disagree
1.47222	man	56	45 to 59 years	5 and more	none	self employed	Bac + 3	married/free union	24 to 36.000 €		Senior managers		Education, health and social work	18	25	Standard duration (Less than 39h)	Very often	Very often	Very often	Individual office	30	16 to 30 minutes	more than one day a week	2 to 4 periods	39	fully disagree	fully disagree		fully agree		agree		fully disagree	fully agree	fully agree	fully disagree	agree	agree	fully disagree	fully disagree		fully disagree	fully disagree	fully agree	fully agree	fully agree		fully disagree
1.47072	man	34	25 to 34 years	3	1	self employed	Bac + 3	married/free union	24 to 36.000 €		Senior managers		other services	2	25	Standard duration (Less than 39h)	rarely	rarely	rarely	at home	0	<15 minutes		2 to 4 periods	32	fully disagree	fully disagree		fully agree		agree		disagree	fully agree	fully agree	fully disagree	fully disagree	disagree	fully disagree	fully disagree		fully disagree	disagree	disagree	agree	agree		agree
1.35625	woman	25	25 to 34 years	3	none	full time	Baccalaureate degree	alone	15 to 24.000 €	Service and office worker		10 to 49 people	Education, health and social work	90	38	Standard duration (Less than 39h)	rarely	never	often	other	15	<15 minutes	no	never	36	agree	agree	agree	agree	agree	agree	agree	agree	agree	agree	disagree	agree	agree	agree	agree	fully disagree	fully agree	agree	agree	agree	disagree	agree	disagree	fully disagree
0.715199	man	52	45 to 59 years	3	1	full time	Bac + 3	married/free union	Over 36.000 €	Technician and associate professional		100 to 499 people	Industry	14	38	Standard duration (Less than 39h)	rarely	never	never	Individual office	10	<15 minutes	no	never	8	disagree	disagree	disagree	agree	disagree	agree	disagree	agree	agree	disagree	agree	agree	agree	agree	disagree	disagree	fully disagree	agree	agree	agree	agree	disagree	agree	disagree
0.300888	man	47	45 to 59 years	4	1	full time	Baccalaureate degree	married/free union	24 to 36.000 €	Technician and associate professional		500 people or more	Industry	348	38	Standard duration (Less than 39h)	rarely	Very often	Very often	production or workshop	5	<15 minutes	no	never	8	disagree	fully agree	agree	fully agree	disagree	agree	fully disagree	agree	agree	disagree	agree	agree	agree	disagree	disagree	agree	fully disagree	agree	fully agree	fully agree	agree	agree	fully agree	disagree
0.435237	woman	43	35 to 44 years	3	1	self employed	Baccalaureate degree	En union libre	15 to 24.000 €		Craftsman, shopkeeper, entrepreneur		other services	67	40	Long duration (39 to 50h)	never	never	never	at home	60	46 to 60 minutes		2 to 4 periods	32	fully disagree	fully disagree		fully disagree		fully agree		fully disagree	fully agree	fully agree	fully disagree	fully disagree	agree	disagree	fully disagree		fully disagree	fully disagree	disagree	agree	fully agree		fully disagree
1.15181	woman	30	25 to 34 years	3	1	full time	Bac + 3	married/free union	15 to 24.000 €	Service and office worker		500 people or more	other services	12	35	Standard duration (Less than 39h)	never	never	never	open space	40	31 to 45 minutes	no	2 to 4 periods	8	disagree	disagree	agree	disagree	agree	agree	disagree	agree	agree	agree	disagree	disagree	agree	disagree	disagree	agree	agree	agree	disagree	agree	agree	disagree	disagree	disagree
0.4695	woman	28	25 to 34 years	3	1	full time	Bac + 3	married/free union	Over 36.000 €	Senior managers		500 people or more	other services	176	50	Long duration (39 to 50h)	rarely	never	often	at customers	30	16 to 30 minutes	more than one day a week	never	28	fully disagree	fully agree	agree	fully disagree	fully disagree	disagree	fully disagree	agree	disagree	fully agree	agree	agree	agree	agree	fully agree	fully agree	fully agree	agree	disagree	fully disagree	disagree	fully disagree	disagree	fully agree
0.977387	woman	42	35 to 44 years	3	1	full time	Bac + 2	En union libre	24 to 36.000 €	Technician and associate professional		100 to 499 people	Industry	1	35	Standard duration (Less than 39h)	never	often	often	open space	20	16 to 30 minutes	no	2 to 4 periods	30	agree	agree	agree	agree	agree	agree	agree	agree	agree	agree	agree	agree	agree	agree	agree	agree	agree	agree	agree	agree	agree	agree	agree	agree
1.98148	woman	32	25 to 34 years	5 and more	3	full time	Bac + 3	married/free union		Service and office worker		9 people or less	other services	41	92	Very Long duration (More than50h)	often	rarely	Very often	open space	30	16 to 30 minutes	more than one day a week	1 period	18	disagree	agree	agree	agree	disagree	agree	disagree	disagree	fully agree	agree	disagree	fully disagree	agree	agree	disagree	disagree	fully disagree	agree	agree	fully agree	fully agree	agree	agree	disagree
0.771008	man	54	45 to 59 years	1	none	full time	Bac + 2	alone	24 to 36.000 €	Service and office worker		500 people or more	other services	48	40	Long duration (39 to 50h)	Very often	never	Very often	Individual office	60	46 to 60 minutes	no	never	22	disagree	fully agree	fully disagree	fully agree	disagree	agree	fully disagree	agree	fully agree	agree	agree	fully agree	fully agree	agree	disagree	fully disagree	agree	fully agree	fully agree	agree	agree	agree	fully agree	fully disagree
0.749514	man	40	35 to 44 years	4	2	full time	Baccalaureate degree	married/free union	Over 36.000 €	Service and office worker		100 to 499 people	other services	146	39	Long duration (39 to 50h)	Very often	rarely	Very often	other	330	>1h30	no	1 period	27	fully disagree	fully agree	agree	fully disagree	agree	fully agree	disagree	fully agree	agree	disagree	fully agree	fully disagree	agree	disagree	disagree	disagree	fully disagree	disagree	agree	agree	agree	fully disagree	disagree	disagree
0.410551	man	53	45 to 59 years	3	1	full time	< baccalaureate degree	married/free union	24 to 36.000 €	Workers		500 people or more	Education, health and social work	228	35	Standard duration (Less than 39h)	never	never	Very often	other	80	1h to 1h30	no	2 to 4 periods	60	agree	fully agree	fully disagree	fully disagree	fully disagree	disagree	agree	fully agree	agree	fully agree	fully agree	disagree	fully disagree	fully disagree	fully agree	fully disagree	fully disagree	disagree	fully agree	agree	agree	fully disagree	agree	disagree
1.42945	woman	45	45 to 59 years	3	1	full time	Bac + 3	married/free union	15 to 24.000 €	Senior managers		9 people or less	Education, health and social work	44	45	Long duration (39 to 50h)	rarely	never	rarely	other	7	<15 minutes	more than one day a week	2 to 4 periods	23	fully disagree	fully agree	fully agree	fully agree	fully agree	fully agree	fully disagree	fully agree	fully agree	fully agree	disagree	agree	agree	agree	fully disagree	fully agree	fully disagree	fully agree	fully agree	fully agree	fully agree	fully agree	disagree	fully disagree
0.722377	man	50	45 to 59 years	3	1	full time	Bac + 2	married/free union	24 to 36.000 €	Service and office worker		50 to 99 people	other services	26	39	Long duration (39 to 50h)	rarely	never	rarely	Individual office	20	16 to 30 minutes	no	2 to 4 periods	21	disagree	disagree	agree	disagree	agree	agree	fully disagree	disagree	agree	disagree	disagree	disagree	agree	disagree	disagree	agree	disagree	agree	agree	agree	agree	agree	disagree	disagree
0.771008	man	53	45 to 59 years	3	none	full time	< baccalaureate degree	married/free union	Over 36.000 €	Service and office worker		50 to 99 people	other services	218	39	Long duration (39 to 50h)	often	never	often	production or workshop	15	<15 minutes	no	never	13	agree	agree	agree	fully disagree	agree	agree	fully disagree	fully disagree	fully agree	agree	disagree	fully disagree	agree	disagree	disagree	agree	fully disagree	agree	disagree	agree	agree	disagree	fully disagree	disagree
1.04282	man	40	35 to 44 years	2	none	full time	< baccalaureate degree	En union libre	under 15.000 €	Workers		50 to 99 people	trading	29	38	Standard duration (Less than 39h)	Very often	never	often	external site	90	1h to 1h30	1 day per week	>4	3	agree	agree	agree	agree	agree	agree	fully disagree	disagree	disagree	disagree	disagree	fully disagree	disagree	agree	disagree	agree	disagree	agree	disagree	fully disagree	disagree	disagree	disagree	disagree
0.696898	man	48	45 to 59 years	3	none	full time	Baccalaureate degree	married/free union		Service and office worker		50 to 99 people	other services	264	35	Standard duration (Less than 39h)	Very often	Very often	rarely	open space	12	<15 minutes	no	1 period	16	agree	agree	disagree	disagree	disagree	agree	disagree	disagree	fully agree	disagree	disagree	fully agree	agree	disagree	agree	agree	fully disagree	agree	agree	disagree	agree	disagree	disagree	disagree
0.812546	man	51	45 to 59 years	4	2	full time	< baccalaureate degree	married/free union	15 to 24.000 €	Technician and associate professional		10 to 49 people	Industry	336	41	Long duration (39 to 50h)	never	never	never	Individual office	45	31 to 45 minutes	no	1 period	9	agree	agree	disagree	agree	agree	agree	disagree	agree	agree	agree	agree	disagree	agree	disagree	disagree	agree	agree	agree	agree	agree	agree	agree	agree	agree
1.1243	woman	30	25 to 34 years	4	2	full time	Bac + 2	En union libre	15 to 24.000 €	Service and office worker		100 to 499 people	trading	8	35	Standard duration (Less than 39h)	rarely	never	never	Individual office	20	16 to 30 minutes	no	2 to 4 periods	48	fully disagree	disagree	disagree	disagree	agree	agree	fully disagree	disagree	disagree	disagree	agree	fully disagree	agree	agree	agree	agree	fully disagree	fully disagree	agree	agree	agree	disagree	agree	disagree
1.40422	man	39	35 to 44 years	1	none	full time	Bac + 2	alone	24 to 36.000 €	Technician and associate professional		9 people or less	other services	216	35	Standard duration (Less than 39h)	never	never	never	Individual office	60	46 to 60 minutes	no	never	9	agree	disagree	agree	agree	agree	agree	agree	agree	fully agree	fully disagree	fully disagree	fully disagree	agree	disagree	disagree	agree	disagree	agree	agree	agree	agree	disagree	agree	disagree
1.2053	woman	40	35 to 44 years	3	1	full time	Baccalaureate degree	married/free union	Over 36.000 €	Service and office worker		10 to 49 people	Transports	237	37	Standard duration (Less than 39h)	Very often	never	never	other	60	46 to 60 minutes	no	never	9	fully agree	disagree	fully disagree	fully disagree	disagree	fully agree	disagree	disagree	fully agree	fully disagree	fully disagree	agree	fully disagree	agree	agree	fully disagree	disagree	fully disagree	agree	fully agree	disagree	agree	agree	fully disagree
1.07639	woman	45	45 to 59 years	2	1	full time	< baccalaureate degree	alone	under 15.000 €	Service and office worker		100 to 499 people	other services	110	45	Long duration (39 to 50h)	never	never	rarely	other	30	16 to 30 minutes	no	2 to 4 periods	9	agree	agree	disagree	disagree	agree	agree	fully disagree	disagree	agree	fully agree	agree	disagree	agree	agree	fully disagree	agree	fully disagree	disagree	fully agree	fully agree	disagree	fully agree	disagree	fully disagree
0.41607	man	26	25 to 34 years	2	none	part time	Bac + 3	En union libre		Senior managers		500 people or more	Education, health and social work	14	20	Standard duration (Less than 39h)	often	rarely	Very often	at customers	360	>1h30	a half day per week	never	22	disagree	fully disagree	disagree	fully disagree	agree	fully agree	fully disagree	disagree	agree	fully agree	fully disagree	fully disagree	fully agree	disagree	fully disagree	agree	disagree	disagree	fully disagree	fully agree	agree	disagree	agree	fully disagree
1.15939	man	46	45 to 59 years	3	1	full time	Baccalaureate degree	En union libre	15 to 24.000 €	Technician and associate professional		9 people or less	Education, health and social work	112	35	Standard duration (Less than 39h)	rarely	never	never	at customers	270	>1h30	no	>4	17	fully disagree	agree	disagree	fully disagree	fully disagree	agree	fully disagree	fully disagree	agree	agree	agree	disagree	disagree	agree	disagree	fully disagree	fully agree	fully disagree	agree	fully agree	agree	fully disagree	fully disagree	disagree
0.782683	man	41	35 to 44 years	4	2	full time	Bac + 3	married/free union		Senior managers		100 to 499 people	other services	40	70	Very Long duration (More than50h)	often	rarely	often	open space	30	16 to 30 minutes	no	never	36	disagree	fully agree	agree	fully agree	agree	agree	fully disagree	fully agree	disagree	agree	fully agree	agree	agree	agree	disagree	agree	disagree	agree	agree	agree	disagree	agree	agree	agree
0.865138	man	34	25 to 34 years	5 and more	3	part time	Baccalaureate degree	married/free union	15 to 24.000 €	Service and office worker		50 to 99 people	trading	103	24	Standard duration (Less than 39h)	Very often	rarely	often	Commercial permises	30	16 to 30 minutes	no	never	4	agree	agree	disagree	disagree	disagree	disagree	disagree	disagree	disagree	agree	fully agree	agree	disagree	agree	agree	disagree	disagree	disagree	agree	disagree	disagree	disagree	disagree	agree
0.84587	man	54	45 to 59 years	4	none	full time	Bac + 3	married/free union	Over 36.000 €	Senior managers		100 to 499 people	Education, health and social work	6	40	Long duration (39 to 50h)	rarely	never	never	open space	600	>1h30	more than one day a week	never	42	disagree	agree	disagree	agree	disagree	disagree	agree	agree	agree	disagree	agree	agree	disagree	agree	disagree	agree	fully agree	disagree	agree	disagree	agree	disagree	agree	disagree
1.84501	man	30	25 to 34 years	1	none	full time	Baccalaureate degree	alone		Workers		9 people or less	other services	98	35	Standard duration (Less than 39h)	rarely	never	rarely	external site	10	<15 minutes	no	never	37	fully agree	disagree	agree	fully disagree	disagree	agree	disagree	fully disagree	agree	disagree	disagree	fully disagree	agree	disagree	disagree	agree	fully disagree	agree	agree	agree	agree	agree	agree	disagree
0.773111	man	59	45 to 59 years	3	1	full time	Bac + 2	married/free union	Over 36.000 €	Service and office worker		100 to 499 people	other services	120	35	Standard duration (Less than 39h)	never	never	never	Individual office	28	16 to 30 minutes	no	never	7	disagree	disagree	agree	agree	disagree	agree	fully disagree	disagree	fully agree	fully disagree	disagree	fully disagree	agree	disagree	disagree	disagree	disagree	agree	disagree	agree	agree	agree	disagree	disagree
0.783203	man	50	45 to 59 years	4	2	full time	Bac + 3	married/free union	15 to 24.000 €	Technician and associate professional		500 people or more	Education, health and social work	245	37	Standard duration (Less than 39h)	Very often	often	often	Individual office	35	31 to 45 minutes	1 day per week	2 to 4 periods	3	agree	agree	fully agree	agree	fully agree	agree	agree	agree	agree	agree	agree	agree	agree	agree	disagree	agree	agree	agree	agree	agree	agree	agree	agree	agree
0.317049	man	40	35 to 44 years	5 and more	4 and more	full time	Bac + 2	married/free union	15 to 24.000 €	Service and office worker		500 people or more	Education, health and social work	36	35	Standard duration (Less than 39h)	rarely	never	Very often	other	45	31 to 45 minutes	no	2 to 4 periods	9	agree	agree	fully disagree	fully disagree	disagree	agree	disagree	disagree	fully agree	fully agree	agree	agree	disagree	fully disagree	agree	disagree	agree	disagree	agree	disagree	disagree	agree	disagree	disagree
0.290293	man	54	45 to 59 years	3	1	full time	Bac + 2	married/free union	Over 36.000 €	Technician and associate professional		500 people or more	Education, health and social work	168	37	Standard duration (Less than 39h)	never	never	never	open space	45	31 to 45 minutes	no	never	12	agree	fully agree	agree	agree	agree	agree	disagree	disagree	fully agree	agree	agree	disagree	agree	agree	disagree	agree	disagree	agree	agree	agree	agree	disagree	disagree	disagree
0.972964	woman	57	45 to 59 years	4	none	full time	Bac + 3	married/free union	Over 36.000 €	Technician and associate professional		10 to 49 people	Education, health and social work	398	24	Standard duration (Less than 39h)	never	never	never	other	5	<15 minutes	no	never	6	fully disagree	disagree	agree	agree	agree	agree	fully disagree	disagree	agree	disagree	disagree	disagree	agree	disagree	fully disagree	disagree	fully disagree	agree	disagree	agree	agree	agree	fully disagree	fully disagree
1.05121	woman	39	35 to 44 years	3	2	full time	Baccalaureate degree	alone	15 to 24.000 €	Service and office worker		10 to 49 people	other services	61	40	Long duration (39 to 50h)	never	never	never	other	120	>1h30	no	>4	31	agree	fully agree	fully disagree	fully disagree	agree	agree	fully disagree	fully disagree	fully agree	agree	fully disagree	fully disagree	fully disagree	disagree	disagree	fully disagree	fully agree	agree	fully agree	fully disagree	fully agree	disagree	fully agree	fully disagree
0.494217	man	26	25 to 34 years	3	none	full time	Baccalaureate degree	alone		Workers		500 people or more	Industry	12	36	Standard duration (Less than 39h)	rarely	Very often	Very often	production or workshop	30	16 to 30 minutes	no	2 to 4 periods	5	agree	agree	disagree	disagree	disagree	fully disagree	disagree	agree	disagree	agree	agree	agree	agree	agree	agree	disagree	fully disagree	disagree	agree	agree	disagree	disagree	agree	agree
0.30139	man	51	45 to 59 years	5 and more	1	full time	Baccalaureate degree	married/free union		Technician and associate professional		500 people or more	Education, health and social work	180	35	Standard duration (Less than 39h)	never	never	never	production or workshop	20	16 to 30 minutes	no	1 period	15	disagree	fully agree	fully disagree	agree	agree	disagree	fully disagree	fully agree	fully agree	fully disagree	disagree	fully disagree	disagree	fully disagree	fully agree	disagree	fully disagree	agree	fully agree	fully agree	disagree	fully disagree	agree	fully disagree
0.566497	man	27	25 to 34 years	4	none	full time	< baccalaureate degree	alone	Over 36.000 €	Workers		500 people or more	other services	42	36	Standard duration (Less than 39h)	often	Very often	Very often	at customers	40	31 to 45 minutes	no	never	0	agree	agree	disagree	fully disagree	disagree	disagree	agree	disagree	agree	disagree	disagree	disagree	fully disagree	disagree	agree	fully disagree	fully disagree	disagree	fully agree	fully disagree	disagree	disagree	disagree	agree
0.791819	man	39	35 to 44 years	4	3	full time	< baccalaureate degree	alone	15 to 24.000 €	Service and office worker		500 people or more	other services	183	40	Long duration (39 to 50h)	rarely	rarely	often	production or workshop	5	<15 minutes	no	never	12	agree	fully agree	disagree	agree	agree	disagree	disagree	agree	agree	agree	disagree	disagree	agree	disagree	disagree	agree	fully disagree	disagree	agree	agree	agree	agree	disagree	disagree
1.02243	man	44	35 to 44 years	2	1	full time	< baccalaureate degree	alone	under 15.000 €	Workers		100 to 499 people	other services	14	35	Standard duration (Less than 39h)	rarely	often	often	production or workshop	45	31 to 45 minutes	no	never	61	agree	agree	disagree	fully disagree	agree	agree	disagree	disagree	agree	disagree	agree	disagree	fully disagree	fully agree	disagree	fully disagree	fully disagree	fully disagree	agree	disagree	agree	fully disagree	disagree	agree
0.297992	man	50	45 to 59 years	4	2	part time	< baccalaureate degree	married/free union	under 15.000 €	Service and office worker		500 people or more	trading	204	35	Standard duration (Less than 39h)	rarely	never	rarely	open space	20	16 to 30 minutes	no	2 to 4 periods	3	fully agree	fully agree	disagree	disagree	disagree	disagree	disagree	fully agree	agree	agree	agree	agree	disagree	agree	agree	agree	disagree	agree	disagree	disagree	agree	disagree	agree	agree
1.11456	man	31	25 to 34 years	3	none	full time	Bac + 2	alone		Technician and associate professional		10 to 49 people	other services	48	35	Standard duration (Less than 39h)	rarely	rarely	often	other	50	46 to 60 minutes	more than one day a week	never	11	fully disagree	fully agree	fully agree	disagree	fully agree	fully agree	fully disagree	fully agree	fully agree	fully agree	fully agree	fully agree	agree	fully disagree	disagree	fully agree	agree	fully agree	disagree	fully agree	fully agree	fully agree	fully agree	fully disagree
1.17998	woman	50	45 to 59 years	3	none	full time	< baccalaureate degree	married/free union	Over 36.000 €	Service and office worker		10 to 49 people	trading	365	45	Long duration (39 to 50h)	rarely	never	rarely	Commercial permises	10	<15 minutes	no	never	6	fully agree	agree	agree	disagree	agree	agree	agree	fully agree	disagree	disagree	agree	agree	disagree	agree	disagree	agree	disagree	disagree	agree	agree	fully agree	agree	disagree	agree
0.47094	man	45	45 to 59 years	1	none	full time	< baccalaureate degree	alone	15 to 24.000 €	Workers		500 people or more	Industry	5	35	Standard duration (Less than 39h)	rarely	never	Very often	production or workshop	10	<15 minutes	no	never	12	disagree	agree	disagree	disagree	disagree	disagree	disagree	agree	fully agree	fully disagree	disagree	disagree	agree	disagree	agree	agree	fully disagree	agree	agree	agree	agree	disagree	disagree	disagree
0.715199	man	59	45 to 59 years	2	none	full time	Baccalaureate degree	married/free union	Over 36.000 €	Technician and associate professional		100 to 499 people	Education, health and social work	286	35	Standard duration (Less than 39h)	never	never	rarely	external site	120	>1h30	no	never	21	disagree	agree	agree	agree	agree	agree	disagree	agree	agree	disagree	fully agree	disagree	agree	agree	disagree	agree	agree	agree	agree	agree	disagree	agree	disagree	disagree
0.87585	man	60	60 years and more	3	1	part time	< baccalaureate degree	married/free union	under 15.000 €	Workers		50 to 99 people	other services	1	20	Standard duration (Less than 39h)	Very often	never	Very often	other	180	>1h30	no	never	21	disagree	disagree	agree	disagree	agree	agree	disagree	disagree	agree	disagree	disagree	disagree	agree	disagree	disagree	agree	agree	agree	disagree	agree	agree	agree	disagree	disagree
1.11047	woman	27	25 to 34 years	1	none	part time	Bac + 2	alone		Service and office worker		50 to 99 people	Transports	6	35	Standard duration (Less than 39h)	often	rarely	often	other	20	16 to 30 minutes	no	2 to 4 periods	28	disagree	fully agree	agree	disagree	agree	agree	fully disagree	disagree	agree	fully agree	fully disagree	disagree	agree	disagree	fully disagree	agree	fully disagree	disagree	agree	agree	agree	fully disagree	fully disagree	fully disagree
0.908675	woman	45	45 to 59 years	4	1	full time	< baccalaureate degree	married/free union	Over 36.000 €	Service and office worker		100 to 499 people	Education, health and social work	288	37	Standard duration (Less than 39h)	never	never	never	open space	30	16 to 30 minutes	no	never	13	disagree	agree	disagree	disagree	agree	fully agree	fully disagree	agree	fully agree	agree	disagree	disagree	fully agree	disagree	disagree	fully agree	disagree	agree	agree	agree	fully agree	disagree	agree	disagree
1.47222	man	47	45 to 59 years	1	none	self employed	Bac + 3	alone	15 to 24.000 €		Senior managers		other services	25	30	Standard duration (Less than 39h)	often	never	never	Individual office	0	<15 minutes	more than one day a week	never	21	disagree	agree		fully agree		fully agree		fully agree	agree	fully agree	disagree	disagree	agree	disagree	fully disagree		fully disagree	agree	agree	agree	fully agree		fully agree
0.61979	woman	37	35 to 44 years	2	none	self employed	< baccalaureate degree	En union libre	Over 36.000 €		Craftsman, shopkeeper, entrepreneur		trading	1	70	Very Long duration (More than50h)	Very often	never	Very often	other	10	<15 minutes	no	2 to 4 periods	33	fully disagree	fully agree		fully agree		fully agree		disagree	agree	disagree	agree	fully disagree	agree	disagree	disagree		fully disagree	agree	agree	fully agree	fully agree		agree
1.18932	woman	33	25 to 34 years	4	2	full time	Bac + 3	married/free union		Service and office worker		10 to 49 people	other services	72	35	Standard duration (Less than 39h)	never	never	never	Individual office	30	16 to 30 minutes	no	2 to 4 periods	13	disagree	agree	fully disagree	disagree	agree	agree	fully disagree	agree	fully agree	fully agree	disagree	fully disagree	fully agree	fully agree	disagree	agree	fully disagree	fully disagree	fully disagree	disagree	agree	fully disagree	fully disagree	fully disagree
0.755593	man	45	45 to 59 years	5 and more	3	full time	Bac + 2	married/free union	Over 36.000 €	Technician and associate professional		500 people or more	other services	38	43	Long duration (39 to 50h)	rarely	rarely	rarely	open space	60	46 to 60 minutes	no	never	13	agree	agree	fully disagree	fully disagree	disagree	agree	disagree	disagree	agree	agree	agree	disagree	fully disagree	disagree	agree	disagree	agree	disagree	disagree	disagree	agree	disagree	disagree	disagree
1.39778	woman	45	45 to 59 years	2	1	full time	< baccalaureate degree	alone	24 to 36.000 €	Workers		10 to 49 people	Industry	1	35	Standard duration (Less than 39h)	never	never	rarely	production or workshop	5	<15 minutes	no	>4	35	fully agree	fully disagree	fully disagree	fully disagree	fully disagree	fully disagree	fully agree	disagree	agree	fully agree	agree	fully disagree	fully disagree	fully agree	fully agree	fully disagree	fully disagree	fully agree	agree	fully disagree	fully disagree	fully disagree	fully disagree	disagree
0.361864	man	31	25 to 34 years	3	1	full time	Bac + 3	married/free union	Over 36.000 €	Senior managers		500 people or more	Education, health and social work	77	35	Standard duration (Less than 39h)	Very often	often	often	Individual office	15	<15 minutes	no	1 period	4	fully agree	agree	agree	agree	agree	agree	agree	disagree	disagree	agree	disagree	fully agree	fully agree	agree	agree	disagree	disagree	agree	disagree	agree	agree	disagree	agree	disagree
1.55516	man	27	25 to 34 years	4	none	full time	< baccalaureate degree	En union libre	24 to 36.000 €	Service and office worker		9 people or less	trading	78	36	Standard duration (Less than 39h)	Very often	Very often	Very often	Commercial permises	61	1h to 1h30	no	never	3	agree	agree	agree	agree	agree	fully agree	fully agree	agree	fully agree	agree	fully agree	fully agree	agree	fully agree	fully agree	disagree	agree	fully agree	agree	disagree	agree	agree	agree	fully agree
1.04384	woman	55	45 to 59 years	2	none	full time	Baccalaureate degree	married/free union	Over 36.000 €	Technician and associate professional		10 to 49 people	other services	83	45	Long duration (39 to 50h)	Very often	often	Very often	open space	20	16 to 30 minutes	no	1 period	9	disagree	disagree	fully disagree	agree	fully disagree	agree	disagree	agree	disagree	agree	disagree	fully agree	disagree	disagree	disagree	agree	fully disagree	disagree	agree	agree	agree	fully disagree	agree	fully disagree
1.09096	woman	44	35 to 44 years	2	none	part time	Baccalaureate degree	En union libre	under 15.000 €	Service and office worker		10 to 49 people	trading	218	20	Standard duration (Less than 39h)	Very often	never	rarely	Individual office	15	<15 minutes	no	1 period	20	disagree	fully agree	agree	agree	agree	agree	fully disagree	agree	fully agree	agree	agree	disagree	agree	disagree	agree	agree	disagree	agree	disagree	fully agree	fully agree	agree	agree	agree
0.442624	woman	55	45 to 59 years	2	1	self employed	Bac + 3	alone	under 15.000 €		Craftsman, shopkeeper, entrepreneur		other services	11	20	Standard duration (Less than 39h)	rarely	never	rarely	at home	10	<15 minutes		>4	54	fully disagree	fully disagree		fully agree		agree		disagree	agree	fully agree	fully disagree	fully disagree	fully agree	disagree	fully disagree		fully disagree	fully agree	agree	agree	fully agree		agree
1.05919	man	42	35 to 44 years	1	none	full time	Baccalaureate degree	alone	15 to 24.000 €	Workers		100 to 499 people	Transports	75	40	Long duration (39 to 50h)	Very often	never	never	other	30	16 to 30 minutes	no	2 to 4 periods	14	disagree	disagree	disagree	agree	agree	agree	disagree	disagree	fully disagree	fully agree	agree	agree	agree	disagree	disagree	agree	disagree	disagree	agree	agree	disagree	disagree	disagree	disagree
0.828893	man	43	35 to 44 years	2	none	full time	Bac + 2	married/free union	Over 36.000 €	Senior managers		100 to 499 people	Education, health and social work	180	38	Standard duration (Less than 39h)	never	never	never	open space	45	31 to 45 minutes	no	never	13	fully disagree	fully disagree	fully disagree	agree	fully disagree	agree	fully disagree	agree	fully agree	agree	fully disagree	disagree	agree	agree	disagree	disagree	fully disagree	disagree	agree	agree	agree	disagree	fully agree	fully disagree
3.99919	woman	24	18 to 24 years	1	none	part time	Baccalaureate degree	alone	15 to 24.000 €	Service and office worker		9 people or less	trading	26	24	Standard duration (Less than 39h)	often	never	never	Commercial permises	5	<15 minutes	no	2 to 4 periods	17	disagree	disagree	disagree	disagree	disagree	agree	disagree	disagree	disagree	disagree	disagree	disagree	disagree	disagree	disagree	disagree	disagree	disagree	disagree	disagree	disagree	disagree	disagree	disagree
1.38249	man	28	25 to 34 years	3	none	full time	Bac + 3	alone	24 to 36.000 €	Technician and associate professional		9 people or less	other services	72	39	Long duration (39 to 50h)	never	rarely	rarely	Individual office	15	<15 minutes	no	never	4	fully agree	agree	agree	fully agree	agree	agree	agree	agree	agree	disagree	fully agree	agree	agree	agree	disagree	fully agree	agree	agree	disagree	fully agree	agree	agree	disagree	agree
0.958225	man	26	25 to 34 years	3	none	full time	Baccalaureate degree	alone		Service and office worker		10 to 49 people	trading	11	39	Long duration (39 to 50h)	rarely	never	rarely	Individual office	35	31 to 45 minutes	no	1 period	11	disagree	agree	disagree	agree	agree	agree	fully disagree	agree	agree	agree	disagree	disagree	agree	disagree	fully disagree	agree	disagree	agree	disagree	agree	agree	agree	agree	disagree
0.897252	woman	56	45 to 59 years	1	none	part time	Bac + 2	alone	15 to 24.000 €	Service and office worker		50 to 99 people	other services	180	15	Standard duration (Less than 39h)	never	never	never	open space	15	<15 minutes	no	never	14	disagree	disagree	agree	disagree	agree	agree	disagree	disagree	fully agree	disagree	fully disagree	disagree	agree	disagree	disagree	agree	fully disagree	agree	fully disagree	agree	agree	disagree	disagree	disagree
0.589118	woman	57	45 to 59 years	2	none	self employed	Baccalaureate degree	married/free union	24 to 36.000 €		Technician and associate professional Service and office worker Workers	9 people or less	Education, health and social work	1	7	Standard duration (Less than 39h)	never	never	never	at customers	10	<15 minutes	no	2 to 4 periods	11	agree	fully agree		fully disagree		agree		fully agree	fully agree	fully disagree	fully agree	fully disagree	fully agree	disagree	disagree		fully disagree	disagree	agree	agree	agree		disagree
0.6245	woman	41	35 to 44 years	2	none	self employed	Bac + 2	En union libre	15 to 24.000 €		Craftsman, shopkeeper, entrepreneur		other services	94	25	Standard duration (Less than 39h)	often	rarely	often	at home	40	31 to 45 minutes		>4	26	disagree	disagree		agree		disagree		agree	disagree	agree	disagree	disagree	disagree	agree	agree		disagree	disagree	agree	agree	disagree		agree
0.791819	man	39	35 to 44 years	1	none	full time	Bac + 2	alone	15 to 24.000 €	Service and office worker		500 people or more	other services	216	55	Very Long duration (More than50h)	Very often	Very often	often	flex office	5	<15 minutes	more than one day a week	never	9	disagree	agree	disagree	disagree	disagree	disagree	agree	agree	agree	agree	agree	fully agree	disagree	disagree	agree	disagree	disagree	agree	fully agree	agree	fully disagree	disagree	agree	disagree
0.755593	man	57	45 to 59 years	2	none	full time	< baccalaureate degree	married/free union		Technician and associate professional		100 to 499 people	other services	336	35	Standard duration (Less than 39h)	often	Very often	never	external site	20	16 to 30 minutes	no	never	19	agree	agree	disagree	disagree	disagree	agree	disagree	disagree	agree	disagree	disagree	fully agree	agree	agree	disagree	fully disagree	disagree	agree	fully agree	disagree	disagree	agree	agree	disagree
0.780776	man	54	45 to 59 years	5 and more	none	full time	Bac + 3	married/free union	Over 36.000 €	Senior managers		500 people or more	Education, health and social work	24	50	Long duration (39 to 50h)	rarely	rarely	rarely	Individual office	40	31 to 45 minutes	no	never	9	disagree	fully agree	agree	agree	agree	agree	fully disagree	agree	fully agree	disagree	disagree	disagree	fully agree	fully disagree	agree	agree	disagree	agree	fully agree	fully agree	disagree	agree	fully agree	disagree
0.906193	woman	50	45 to 59 years	2	none	self employed	Bac + 3	married/free union	Over 36.000 €		Senior managers		Insurance and real estate	454	40	Long duration (39 to 50h)	Very often	never	never	Individual office	5	<15 minutes	no	1 period	39	disagree	fully agree		agree		agree		agree	agree	agree	agree	agree	agree	disagree	agree		fully disagree	agree	agree	agree	agree		fully agree
0.395661	man	53	45 to 59 years	1	none	full time	Baccalaureate degree	alone	15 to 24.000 €	Workers		500 people or more	Transports	144	35	Standard duration (Less than 39h)	Very often	rarely	Very often	other	35	31 to 45 minutes	no	1 period	35	fully agree	fully agree	disagree	fully agree	disagree	disagree	disagree	fully agree	fully agree	fully agree	fully agree	fully agree	disagree	disagree	agree	disagree	fully agree	agree	fully agree	disagree	fully disagree	agree	fully agree	fully agree
1.17998	woman	50	45 to 59 years	2	none	full time	< baccalaureate degree	alone	15 to 24.000 €	Service and office worker		10 to 49 people	trading	36	35	Standard duration (Less than 39h)	rarely	never	rarely	Commercial permises	10	<15 minutes	no	1 period	8	fully agree	fully agree	agree	fully agree	agree	disagree	agree	agree	fully agree	agree	agree	agree	agree	agree	disagree	disagree	fully agree	agree	disagree	fully agree	fully agree	disagree	agree	disagree
0.862256	man	53	45 to 59 years	2	none	self employed	Bac + 3	married/free union			Craftsman, shopkeeper, entrepreneur		other services	121	30	Standard duration (Less than 39h)	Very often	often	Very often	at home	80	1h to 1h30		never	34	fully disagree	fully disagree		fully agree		fully agree		disagree	agree	disagree	agree	disagree	agree	disagree	fully disagree		fully disagree	fully agree	disagree	fully agree	fully agree		fully agree
0.907756	man	29	25 to 34 years	2	none	full time	Bac + 3	married/free union	24 to 36.000 €	Senior managers		500 people or more	Education, health and social work	90	35	Standard duration (Less than 39h)	often	never	rarely	at home	15	<15 minutes		never	17	disagree	agree	agree	disagree	agree	agree	fully disagree	disagree	fully agree	disagree	agree	fully agree	disagree	agree	fully disagree	disagree	fully disagree	agree	disagree	disagree	agree	fully agree	fully agree	disagree
1.8754	man	44	35 to 44 years	2	none	full time	Baccalaureate degree	En union libre		Workers		9 people or less	Industry	12	35	Standard duration (Less than 39h)	never	never	never	external site	60	46 to 60 minutes	no	never	0	disagree	disagree	disagree	disagree	disagree	disagree	disagree	disagree	disagree	disagree	disagree	disagree	disagree	disagree	agree	disagree	disagree	disagree	disagree	disagree	disagree	disagree	fully agree	fully agree
0.77996	man	52	45 to 59 years	3	none	full time	< baccalaureate degree	married/free union	Over 36.000 €	Service and office worker		10 to 49 people	Education, health and social work	20	35	Standard duration (Less than 39h)	often	rarely	often	other	40	31 to 45 minutes	no	2 to 4 periods	10	disagree	disagree	disagree	disagree	agree	disagree	fully disagree	disagree	agree	fully agree	disagree	disagree	disagree	agree	agree	agree	fully disagree	agree	agree	fully agree	agree	agree	agree	agree
1.01807	woman	35	35 to 44 years	4	2	full time	Baccalaureate degree	married/free union	24 to 36.000 €	Service and office worker		50 to 99 people	Education, health and social work	156	37	Standard duration (Less than 39h)	Very often	never	often	other	10	<15 minutes	no	never	22	disagree	agree	agree	agree	agree	agree	fully disagree	fully agree	agree	fully agree	fully agree	agree	fully agree	disagree	agree	agree	fully disagree	agree	fully agree	agree	agree	agree	agree	disagree
0.358368	woman	61	60 years and more	3	none	full time	Bac + 2	married/free union	Over 36.000 €	Senior managers		500 people or more	other services	304	40	Long duration (39 to 50h)	never	never	never	Individual office	10	<15 minutes	no	never	0	agree	agree	agree	agree	agree	fully agree	agree	agree	agree	fully agree	fully agree	agree	agree	agree	agree	agree	fully disagree	disagree	agree	agree	agree	agree	disagree	agree
0.345275	woman	63	60 years and more	1	none	full time	Bac + 3	alone	Over 36.000 €	Senior managers		500 people or more	Transports	120	39	Long duration (39 to 50h)	rarely	never	often	Individual office	10	<15 minutes	a half day per week	never	22	fully disagree	fully disagree	disagree	fully disagree	disagree	disagree	disagree	agree	agree	agree	disagree	fully disagree	disagree	disagree	fully disagree	disagree	fully disagree	agree	disagree	agree	agree	disagree	fully agree	disagree
1.98148	woman	25	25 to 34 years	1	none	full time	< baccalaureate degree	alone		Service and office worker		9 people or less	trading	32	36	Standard duration (Less than 39h)	never	never	never	Commercial permises	20	16 to 30 minutes	no	1 period	9	disagree	fully disagree	fully agree	fully disagree	fully disagree	agree	fully disagree	fully disagree	agree	fully disagree	fully disagree	disagree	agree	fully disagree	fully disagree	agree	fully disagree	agree	fully disagree	agree	agree	fully disagree	agree	fully disagree
1.2765	woman	52	45 to 59 years	2	none	full time	< baccalaureate degree	married/free union	Over 36.000 €	Workers		100 to 499 people	other services	300	35	Standard duration (Less than 39h)	never	never	never	other	15	<15 minutes	no	1 period	15	agree	agree	disagree	fully disagree	agree	agree	fully disagree	fully disagree	agree	disagree	fully disagree	fully disagree	agree	fully disagree	disagree	fully agree	fully disagree	agree	agree	agree	disagree	agree	fully disagree	fully disagree
0.823282	man	42	35 to 44 years	4	2	full time	< baccalaureate degree	married/free union		Service and office worker		10 to 49 people	other services	228	35	Standard duration (Less than 39h)	often	rarely	never	external site	20	16 to 30 minutes	no	never	9	disagree	agree	agree	agree	agree	agree	agree	disagree	agree	disagree	disagree	disagree	agree	disagree	disagree	agree	disagree	agree	disagree	agree	agree	agree	disagree	disagree
0.500582	man	40	35 to 44 years	5 and more	4 and more	full time	< baccalaureate degree	married/free union	Over 36.000 €	Workers		500 people or more	Transports	168	35	Standard duration (Less than 39h)	Very often	often	often	external site	45	31 to 45 minutes	no	1 period	5	agree	fully agree	agree	disagree	agree	agree	disagree	agree	agree	disagree	disagree	disagree	agree	disagree	disagree	agree	agree	agree	fully agree	fully agree	agree	agree	agree	disagree
0.959755	woman	48	45 to 59 years	3	none	part time	Baccalaureate degree	En union libre	Over 36.000 €	Service and office worker		100 to 499 people	Education, health and social work	128	20	Standard duration (Less than 39h)	rarely	never	rarely	other	18	16 to 30 minutes	more than one day a week	2 to 4 periods	4	disagree	disagree	disagree	disagree	agree	disagree	disagree	disagree	agree	agree	fully agree	disagree	disagree	disagree	agree	disagree	fully disagree	disagree	agree	agree	agree	agree	agree	fully agree
0.778848	man	46	45 to 59 years	4	2	full time	Bac + 3	married/free union	Over 36.000 €	Senior managers		500 people or more	building	48	39	Long duration (39 to 50h)	never	never	Very often	Individual office	120	>1h30	no	never	51	agree	agree	disagree	agree	disagree	agree	fully disagree	fully agree	fully disagree	disagree	fully agree	agree	agree	fully disagree	disagree	disagree	agree	disagree	agree	agree	disagree	agree	fully agree	agree
1.03331	man	32	25 to 34 years	2	none	self employed	Bac + 2	En union libre	24 to 36.000 €		Craftsman, shopkeeper, entrepreneur		building	24	50	Long duration (39 to 50h)	often	often	Very often	at customers	120	>1h30	no	never	15	fully disagree	fully agree		fully agree		disagree		agree	agree	fully agree	fully agree	disagree	fully agree	disagree	disagree		disagree	agree	agree	agree	agree		disagree
0.865138	man	34	25 to 34 years	3	none	full time	< baccalaureate degree	En union libre	under 15.000 €	Service and office worker		50 to 99 people	trading	48	35	Standard duration (Less than 39h)	often	never	often	Commercial permises	30	16 to 30 minutes	no	2 to 4 periods	12	fully agree	fully agree	fully agree	disagree	agree	disagree	disagree	agree	agree	agree	disagree	fully agree	agree	agree	disagree	agree	fully disagree	fully agree	agree	fully agree	fully agree	agree	disagree	disagree
1.68467	woman	29	25 to 34 years	2	none	part time	Baccalaureate degree	alone	15 to 24.000 €	Service and office worker		9 people or less	trading	0	17	Standard duration (Less than 39h)	rarely	never	rarely	at home	0	<15 minutes		>4	15	fully disagree	fully disagree	fully agree	fully agree	fully agree	fully agree	fully disagree	disagree	fully agree	agree	fully disagree	disagree	fully agree	disagree	fully disagree	fully agree	fully disagree	fully agree	fully disagree	fully agree	fully agree	agree	agree	fully disagree
0.998466	man	51	45 to 59 years	2	none	full time	Baccalaureate degree	married/free union		Workers		100 to 499 people	Industry	360	40	Long duration (39 to 50h)	often	Very often	Very often	production or workshop	30	16 to 30 minutes	no	never	13	disagree	agree	disagree	disagree	fully disagree	agree	agree	agree	agree	agree	disagree	agree	agree	agree	agree	disagree	disagree	agree	fully agree	disagree	disagree	disagree	agree	disagree
0.342219	man	57	45 to 59 years	3	2	full time	< baccalaureate degree	alone	24 to 36.000 €	Service and office worker		500 people or more	trading	144	35	Standard duration (Less than 39h)	never	never	rarely	open space	80	1h to 1h30	no	never	10	disagree	agree	agree	agree	agree	agree	fully disagree	agree	agree	agree	agree	fully disagree	agree	disagree	fully disagree	fully agree	disagree	agree	agree	agree	agree	agree	agree	disagree
0.300209	man	56	45 to 59 years	1	none	full time	Bac + 2	alone	24 to 36.000 €	Senior managers		500 people or more	other services	336	40	Long duration (39 to 50h)	often	often	Very often	open space	90	1h to 1h30	1 day per week	2 to 4 periods	35	disagree	fully agree	disagree	disagree	disagree	disagree	agree	agree	disagree	disagree	agree	agree	fully disagree	fully agree	agree	disagree	agree	disagree	fully agree	disagree	disagree	disagree	agree	agree
0.539528	woman	33	25 to 34 years	3	1	full time	Bac + 3	married/free union	Over 36.000 €	Senior managers		500 people or more	Insurance and real estate	48	38	Standard duration (Less than 39h)	never	never	rarely	open space	120	>1h30	1 day per week	never	20	disagree	agree	disagree	agree	agree	agree	disagree	agree	agree	agree	disagree	agree	agree	disagree	disagree	agree	agree	agree	disagree	agree	agree	agree	disagree	disagree
0.781216	man	56	45 to 59 years	5 and more	none	full time	Bac + 3	married/free union	Over 36.000 €	Technician and associate professional		500 people or more	Industry	432	40	Long duration (39 to 50h)	often	rarely	Very often	production or workshop	50	46 to 60 minutes	no	never	10	fully disagree	agree	disagree	disagree	disagree	agree	fully disagree	agree	agree	fully disagree	disagree	fully disagree	agree	fully disagree	disagree	disagree	disagree	disagree	fully agree	agree	fully agree	agree	agree	fully disagree
0.885621	man	31	25 to 34 years	1	none	full time	Bac + 3	alone		Senior managers		100 to 499 people	Industry	72	42	Long duration (39 to 50h)	never	never	never	Individual office	15	<15 minutes	no	never	10	disagree	agree	agree	fully agree	agree	agree	disagree	agree	agree	disagree	disagree	disagree	agree	fully disagree	disagree	agree	disagree	agree	agree	agree	agree	agree	disagree	disagree
0.376597	woman	52	45 to 59 years	3	1	full time	< baccalaureate degree	married/free union		Senior managers		500 people or more	other services	12	55	Very Long duration (More than50h)	Very often	rarely	rarely	flex office	45	31 to 45 minutes	no	never	8	disagree	fully agree	fully disagree	fully agree	fully disagree	agree	fully disagree	fully agree	fully agree	agree	fully agree	fully agree	fully disagree	agree	disagree	fully disagree	disagree	agree	fully agree	agree	disagree	fully disagree	fully agree	disagree
0.783203	man	45	45 to 59 years	4	2	full time	Baccalaureate degree	married/free union	Over 36.000 €	Technician and associate professional		10 to 49 people	other services	270	45	Long duration (39 to 50h)	Very often	often	often	external site	2	<15 minutes	no	never	1	disagree	agree	agree	disagree	disagree	agree	disagree	agree	disagree	agree	disagree	agree	agree	agree	disagree	disagree	fully disagree	agree	agree	agree	agree	agree	disagree	disagree
0.775767	man	59	45 to 59 years	3	none	full time	Bac + 2	married/free union	24 to 36.000 €	Service and office worker		10 to 49 people	building	180	42	Long duration (39 to 50h)	rarely	never	rarely	Individual office	15	<15 minutes	1 day per week	never	21	disagree	agree	agree	agree	agree	agree	disagree	fully agree	fully agree	agree	fully agree	agree	agree	disagree	disagree	agree	disagree	agree	fully agree	fully agree	agree	agree	agree	agree
0.84587	man	49	45 to 59 years	5 and more	none	full time	Bac + 3	married/free union	Over 36.000 €	Senior managers		100 to 499 people	Industry	8	42	Long duration (39 to 50h)	rarely	rarely	rarely	open space	80	1h to 1h30	a half day per week	1 period	6	fully disagree	agree	disagree	agree	agree	agree	fully disagree	agree	agree	agree	fully agree	disagree	agree	disagree	disagree	agree	agree	agree	agree	agree	disagree	agree	agree	agree
0.84587	man	47	45 to 59 years	5 and more	3	full time	Bac + 3	married/free union	Over 36.000 €	Senior managers		100 to 499 people	Industry	120	50	Long duration (39 to 50h)	rarely	never	rarely	Individual office	150	>1h30	no	never	18	fully disagree	disagree	fully disagree	fully agree	disagree	agree	fully disagree	fully agree	fully agree	disagree	fully disagree	agree	agree	fully disagree	fully agree	fully disagree	agree	agree	agree	agree	fully agree	agree	agree	agree
0.826787	man	50	45 to 59 years	3	none	part time	Bac + 3	married/free union	15 to 24.000 €	Service and office worker		50 to 99 people	other services	264	25	Standard duration (Less than 39h)	rarely	never	rarely	open space	30	16 to 30 minutes	no	1 period	7	agree	disagree	agree	disagree	fully agree	fully agree	disagree	disagree	agree	disagree	disagree	disagree	fully agree	disagree	fully disagree	agree	fully disagree	agree	agree	agree	agree	disagree	agree	disagree
0.771008	man	55	45 to 59 years	1	none	part time	Baccalaureate degree	alone	under 15.000 €	Service and office worker		10 to 49 people	Transports	396	30	Standard duration (Less than 39h)	Very often	never	often	external site	30	16 to 30 minutes	no	never	20	agree	disagree	agree	disagree	agree	agree	disagree	disagree	agree	agree	agree	disagree	agree	disagree	disagree	agree	fully disagree	agree	agree	agree	agree	agree	disagree	agree
1.33529	man	31	25 to 34 years	2	none	full time	Bac + 3	married/free union	24 to 36.000 €	Technician and associate professional		9 people or less	other services	23	35	Standard duration (Less than 39h)	rarely	Very often	Very often	production or workshop	10	<15 minutes	no	never	15	agree	disagree	agree	agree	disagree	agree	disagree	disagree	agree	agree	disagree	agree	disagree	agree	disagree	disagree	disagree	disagree	agree	agree	disagree	disagree	disagree	disagree
1.43258	woman	58	45 to 59 years	2	none	full time	< baccalaureate degree	married/free union	Over 36.000 €	Technician and associate professional		9 people or less	Education, health and social work	480	35	Standard duration (Less than 39h)	rarely	never	rarely	other	80	1h to 1h30	no	never	18	agree	fully agree	disagree	agree	agree	agree	fully disagree	agree	agree	fully disagree	disagree	agree	fully agree	fully disagree	disagree	agree	disagree	disagree	agree	agree	agree	agree	agree	disagree
0.726691	man	26	25 to 34 years	1	none	self employed	Bac + 2	En union libre	24 to 36.000 €		Craftsman, shopkeeper, entrepreneur		other services	48	50	Long duration (39 to 50h)	rarely	never	Very often	external site	240	>1h30	no	never	34	disagree	agree		fully agree		agree		agree	agree	agree	agree	disagree	fully agree	agree	disagree		agree	agree	fully agree	fully agree	agree		agree
1.43258	woman	45	45 to 59 years	2	none	full time	< baccalaureate degree	En union libre	Over 36.000 €	Technician and associate professional		9 people or less	trading	288	39	Long duration (39 to 50h)	rarely	never	never	Individual office	10	<15 minutes	no	never	32	disagree	agree	agree	agree	disagree	disagree	disagree	agree	agree	agree	agree	fully agree	disagree	agree	fully agree	fully disagree	fully disagree	disagree	agree	agree	agree	disagree	agree	agree
0.587279	woman	32	25 to 34 years	1	none	self employed	Bac + 3	alone	24 to 36.000 €		Technician and associate professional Service and office worker Workers		Education, health and social work	78	40	Long duration (39 to 50h)	never	never	rarely	Individual office	30	16 to 30 minutes	no	never	17	disagree	disagree		disagree		agree		disagree	agree	disagree	disagree	disagree	agree	disagree	agree		disagree	disagree	disagree	agree	disagree		disagree
0.37339	woman	50	45 to 59 years	2	none	full time	< baccalaureate degree	married/free union	Over 36.000 €	Service and office worker		500 people or more	Education, health and social work	396	39	Long duration (39 to 50h)	rarely	never	never	open space	15	<15 minutes	no	2 to 4 periods	19	disagree	agree	agree	agree	agree	fully agree	disagree	agree	agree	disagree	agree	disagree	agree	disagree	disagree	agree	fully disagree	agree	agree	agree	agree	agree	agree	disagree
0.970245	woman	53	45 to 59 years	2	none	full time	Bac + 3	married/free union	Over 36.000 €	Senior managers		500 people or more	other services	206	37	Standard duration (Less than 39h)	rarely	never	rarely	Individual office	25	16 to 30 minutes	no	never	27	disagree	agree	fully disagree	disagree	disagree	fully agree	agree	disagree	fully agree	fully agree	disagree	fully disagree	disagree	fully agree	fully agree	fully disagree	agree	disagree	fully disagree	disagree	disagree	fully disagree	agree	disagree
0.300209	man	57	45 to 59 years	4	2	full time	< baccalaureate degree	married/free union	Over 36.000 €	Senior managers		500 people or more	trading	366	45	Long duration (39 to 50h)	never	never	rarely	Individual office	30	16 to 30 minutes	no	never	14	fully disagree	fully disagree	fully agree	fully agree	fully agree	fully agree	fully disagree	disagree	fully agree	agree	fully disagree	fully disagree	fully agree	fully disagree	fully disagree	fully agree	fully disagree	fully agree	agree	fully agree	fully agree	fully agree	agree	fully disagree
0.720434	man	53	45 to 59 years	3	1	full time	Baccalaureate degree	married/free union	24 to 36.000 €	Service and office worker		50 to 99 people	Education, health and social work	134	42	Long duration (39 to 50h)	rarely	never	rarely	Individual office	20	16 to 30 minutes	no	2 to 4 periods	0	disagree	agree	disagree	agree	disagree	disagree	disagree	agree	disagree	disagree	disagree	disagree	disagree	disagree	agree	disagree	disagree	disagree	disagree	disagree	agree	agree	agree	disagree
0.718699	man	39	35 to 44 years	2	1	self employed	Baccalaureate degree	alone	under 15.000 €		Craftsman, shopkeeper, entrepreneur		trading	36	25	Standard duration (Less than 39h)	rarely	rarely	often	at home	0	<15 minutes		>4	40	agree	agree		agree		agree		agree	agree	agree	agree	agree	agree	agree	agree		agree	agree	agree	agree	agree		agree
0.849569	man	41	35 to 44 years	5 and more	4 and more	self employed	Bac + 2	En union libre	under 15.000 €		Craftsman, shopkeeper, entrepreneur	9 people or less	building	240	40	Long duration (39 to 50h)	often	never	often	at customers	120	>1h30	no	2 to 4 periods	7	disagree	agree		agree		disagree		agree	agree	agree	agree	agree	disagree	disagree	disagree		agree	agree	agree	agree	agree		agree
1.00506	woman	45	45 to 59 years	4	2	full time	Bac + 3	married/free union	Over 36.000 €	Technician and associate professional		500 people or more	Education, health and social work	276	31	Standard duration (Less than 39h)	rarely	never	rarely	Individual office	30	16 to 30 minutes	no	never	33	disagree	fully agree	fully agree	disagree	disagree	agree	fully disagree	disagree	fully agree	fully agree	disagree	disagree	disagree	disagree	fully agree	disagree	disagree	disagree	fully agree	fully agree	fully agree	fully agree	disagree	fully disagree
0.6245	woman	43	35 to 44 years	2	1	self employed	Baccalaureate degree	alone	under 15.000 €		Craftsman, shopkeeper, entrepreneur		other services	208	50	Long duration (39 to 50h)	often	rarely	rarely	at home	30	16 to 30 minutes		never	6	fully disagree	fully disagree		fully agree		agree		disagree	agree	agree	disagree	fully disagree	agree	disagree	fully disagree		fully disagree	agree	fully disagree	agree	fully agree		agree
0.400485	woman	42	35 to 44 years	1	none	full time	Bac + 3	alone	24 to 36.000 €	Senior managers		500 people or more	Transports	150	50	Long duration (39 to 50h)	Very often	never	rarely	Individual office	120	>1h30	a half day per week	never	21	fully disagree	disagree	agree	agree	disagree	agree	fully disagree	agree	agree	agree	agree	fully agree	fully agree	disagree	disagree	agree	agree	agree	disagree	agree	disagree	disagree	agree	agree
0.756295	woman	57	45 to 59 years	4	1	self employed	Bac + 3	En union libre	Over 36.000 €		Senior managers		other services	153	41	Long duration (39 to 50h)	often	rarely	rarely	at home	40	31 to 45 minutes		never	27	agree	agree		fully agree		fully agree		fully agree	agree	agree	agree	agree	fully agree	disagree	fully disagree		disagree	fully disagree	agree	fully agree	fully agree		fully agree
0.391352	woman	59	45 to 59 years	2	1	full time	Bac + 2	alone		Technician and associate professional		500 people or more	Education, health and social work	36	39	Long duration (39 to 50h)	never	never	Very often	open space	20	16 to 30 minutes	no	never	49	agree	fully agree	fully disagree	agree	agree	agree	disagree	fully agree	agree	agree	fully agree	disagree	agree	fully agree	disagree	disagree	disagree	agree	disagree	agree	disagree	disagree	agree	agree
0.310027	man	35	35 to 44 years	3	1	full time	Bac + 3	married/free union	Over 36.000 €	Senior managers		500 people or more	other services	144	35	Standard duration (Less than 39h)	rarely	rarely	rarely	open space	15	<15 minutes	no	never	0	agree	agree	agree	agree	agree	agree	agree	agree	agree	agree	agree	agree	agree	agree	agree	agree	agree	agree	agree	agree	agree	agree	agree	agree
1.28073	woman	46	45 to 59 years	1	none	part time	Baccalaureate degree	alone	under 15.000 €	Workers		100 to 499 people	Industry	128	35	Standard duration (Less than 39h)	never	often	often	production or workshop	30	16 to 30 minutes	no	2 to 4 periods	9	agree	agree	disagree	disagree	disagree	disagree	disagree	agree	disagree	agree	disagree	agree	disagree	disagree	agree	agree	disagree	fully disagree	disagree	disagree	agree	disagree	fully agree	agree
1.19385	woman	47	45 to 59 years	4	2	full time	Bac + 3	married/free union	Over 36.000 €	Senior managers		10 to 49 people	Education, health and social work	120	50	Long duration (39 to 50h)	Very often	rarely	never	Individual office	30	16 to 30 minutes	1 day per week	1 period	17	disagree	disagree	agree	fully agree	fully agree	fully agree	disagree	agree	fully agree	disagree	fully agree	agree	agree	agree	disagree	disagree	fully disagree	agree	fully agree	fully agree	agree	agree	fully disagree	agree
0.320153	man	42	35 to 44 years	2	none	full time	Bac + 2	married/free union		Technician and associate professional		500 people or more	Industry	130	60	Very Long duration (More than50h)	rarely	Very often	Very often	production or workshop	15	<15 minutes	no	never	36	agree	agree	disagree	agree	disagree	disagree	fully disagree	agree	disagree	agree	disagree	disagree	disagree	fully disagree	agree	disagree	fully disagree	disagree	agree	disagree	disagree	agree	disagree	agree
0.731766	man	54	45 to 59 years	3	none	full time	< baccalaureate degree	married/free union	Over 36.000 €	Technician and associate professional		50 to 99 people	trading	288	35	Standard duration (Less than 39h)	rarely	never	Very often	other	25	16 to 30 minutes	no	never	41	agree	fully agree	disagree	fully disagree	agree	disagree	agree	agree	agree	fully agree	agree	disagree	disagree	agree	agree	disagree	disagree	disagree	agree	disagree	fully disagree	fully disagree	agree	agree
0.395661	man	47	45 to 59 years	4	1	full time	< baccalaureate degree	married/free union	15 to 24.000 €	Workers		500 people or more	Industry	205	36	Standard duration (Less than 39h)	rarely	never	never	external site	25	16 to 30 minutes	no	never	10	disagree	disagree	disagree	disagree	agree	agree	disagree	disagree	agree	disagree	agree	disagree	disagree	disagree	disagree	agree	disagree	agree	disagree	agree	agree	agree	disagree	fully disagree
1.35687	man	33	25 to 34 years	2	none	full time	Baccalaureate degree	En union libre	24 to 36.000 €	Service and office worker		9 people or less	trading	17	35	Standard duration (Less than 39h)	never	never	rarely	open space	15	<15 minutes	no	1 period	2	agree	agree	disagree	agree	agree	agree	disagree	agree	agree	disagree	agree	agree	agree	disagree	agree	agree	agree	agree	disagree	agree	agree	agree	disagree	agree
0.375841	woman	48	45 to 59 years	4	none	full time	Bac + 2	married/free union	24 to 36.000 €	Service and office worker		500 people or more	Education, health and social work	48	35	Standard duration (Less than 39h)	never	never	never	Individual office	20	16 to 30 minutes	no	2 to 4 periods	19	fully disagree	agree	agree	agree	agree	fully agree	fully disagree	agree	fully agree	fully disagree	agree	fully disagree	agree	disagree	fully disagree	agree	fully disagree	agree	disagree	agree	agree	agree	disagree	disagree
1.76419	woman	27	25 to 34 years	3	1	part time	Bac + 3	En union libre	24 to 36.000 €	Technician and associate professional		9 people or less	other services	36	28	Standard duration (Less than 39h)	often	never	never	open space	10	<15 minutes	no	1 period	39	fully agree	disagree	disagree	fully disagree	agree	agree	disagree	disagree	agree	fully agree	agree	fully disagree	disagree	agree	agree	disagree	fully disagree	disagree	disagree	fully disagree	disagree	fully disagree	agree	agree
1.26086	woman	57	45 to 59 years	2	none	full time	Baccalaureate degree	alone		Workers		50 to 99 people	Industry	300	35	Standard duration (Less than 39h)	rarely	never	rarely	production or workshop	30	16 to 30 minutes	no	2 to 4 periods	7	agree	disagree	disagree	agree	agree	agree	disagree	disagree	fully agree	agree	disagree	disagree	fully agree	disagree	disagree	agree	disagree	agree	disagree	agree	agree	disagree	disagree	disagree
1.12716	man	36	35 to 44 years	3	1	full time	< baccalaureate degree	En union libre	15 to 24.000 €	Workers		10 to 49 people	Industry	13	38	Standard duration (Less than 39h)	rarely	never	often	production or workshop	30	16 to 30 minutes	no	2 to 4 periods	22	agree	agree	agree	disagree	agree	agree	disagree	agree	agree	agree	agree	agree	agree	disagree	disagree	agree	disagree	agree	disagree	agree	agree	agree	agree	agree
0.662637	man	62	60 years and more	2	none	full time	< baccalaureate degree	married/free union	15 to 24.000 €	Service and office worker		50 to 99 people	trading	420	35	Standard duration (Less than 39h)	never	never	never	flex office	15	<15 minutes	no	1 period	16	agree	disagree	fully disagree	fully disagree	fully disagree	agree	agree	agree	fully agree	fully agree	agree	disagree	fully disagree	fully disagree	agree	fully disagree	fully disagree	fully disagree	agree	disagree	agree	fully disagree	agree	agree
0.941397	woman	46	45 to 59 years	3	none	part time	Baccalaureate degree	married/free union		Service and office worker		100 to 499 people	Education, health and social work	324	12	Standard duration (Less than 39h)	never	never	never	flex office	20	16 to 30 minutes	no	never	57	agree	disagree	fully disagree	fully disagree	fully disagree	fully disagree	disagree	agree	disagree	fully agree	disagree	agree	fully disagree	fully agree	fully agree	fully disagree	disagree	disagree	agree	disagree	fully disagree	fully disagree	agree	agree
1.67838	woman	33	25 to 34 years	4	2	full time	< baccalaureate degree	married/free union	15 to 24.000 €	Service and office worker		9 people or less	other services	6	35	Standard duration (Less than 39h)	never	never	never	other	15	<15 minutes	no	never	15	agree	fully disagree	agree	fully agree	agree	agree	fully agree	agree	disagree	disagree	agree	agree	fully agree	agree	fully disagree	agree	agree	agree	disagree	agree	disagree	disagree	fully agree	fully disagree
0.791819	man	43	35 to 44 years	1	none	full time	Baccalaureate degree	alone	15 to 24.000 €	Service and office worker		10 to 49 people	Education, health and social work	111	35	Standard duration (Less than 39h)	often	never	rarely	other	5	<15 minutes	no	1 period	21	disagree	agree	disagree	agree	agree	agree	agree	agree	agree	disagree	disagree	disagree	agree	disagree	disagree	agree	disagree	agree	disagree	agree	fully agree	disagree	disagree	disagree
1.10675	woman	29	25 to 34 years	4	none	full time	< baccalaureate degree	alone	15 to 24.000 €	Service and office worker		50 to 99 people	trading	60	35	Standard duration (Less than 39h)	Very often	never	never	Commercial permises	30	16 to 30 minutes	no	2 to 4 periods	38	agree	fully agree	fully disagree	fully disagree	fully disagree	disagree	fully disagree	agree	fully agree	fully agree	agree	fully agree	fully disagree	fully disagree	disagree	fully disagree	agree	agree	fully agree	fully disagree	agree	fully disagree	agree	agree
1.20422	woman	31	25 to 34 years	2	none	full time	Bac + 2	married/free union	Over 36.000 €	Technician and associate professional		500 people or more	Education, health and social work	123	35	Standard duration (Less than 39h)	often	often	often	open space	25	16 to 30 minutes	no	never	22	disagree	agree	agree	fully disagree	fully disagree	disagree	fully disagree	fully disagree	agree	fully agree	disagree	agree	agree	fully disagree	fully disagree	disagree	fully disagree	agree	fully agree	agree	fully disagree	disagree	disagree	fully disagree
1.45509	woman	57	45 to 59 years	1	none	part time	Bac + 2	alone	under 15.000 €	Service and office worker		9 people or less	other services	240	87	Very Long duration (More than50h)	never	never	rarely	open space	120	>1h30	no	>4	35	disagree	agree	agree	disagree	fully agree	fully agree	fully disagree	agree	agree	fully agree	disagree	fully disagree	fully agree	disagree	fully disagree	agree	fully agree	agree	fully disagree	fully agree	fully agree	agree	agree	fully disagree
1.01807	woman	40	35 to 44 years	1	none	full time	Bac + 2	alone	under 15.000 €	Service and office worker		500 people or more	other services	52	39	Long duration (39 to 50h)	never	never	never	Individual office	30	16 to 30 minutes	no	never	9	fully disagree	fully disagree	agree	disagree	disagree	agree	agree	disagree	agree	disagree	fully disagree	fully disagree	agree	disagree	disagree	agree	fully disagree	agree	disagree	agree	agree	agree	disagree	fully disagree
0.719458	man	57	45 to 59 years	1	none	full time	Bac + 2	alone	Over 36.000 €	Technician and associate professional		100 to 499 people	Industry	14	35	Standard duration (Less than 39h)	rarely	never	never	open space	20	16 to 30 minutes	no	never	18	agree	fully agree	agree	agree	agree	agree	fully disagree	fully agree	fully agree	agree	disagree	fully disagree	agree	agree	disagree	agree	fully disagree	fully agree	agree	agree	fully agree	disagree	agree	disagree
0.850466	man	44	35 to 44 years	3	2	full time	Bac + 2	alone	15 to 24.000 €	Service and office worker		10 to 49 people	trading	36	39	Long duration (39 to 50h)	Very often	never	rarely	Commercial permises	40	31 to 45 minutes	no	never	8	disagree	disagree	agree	disagree	agree	agree	fully disagree	agree	agree	agree	disagree	fully disagree	disagree	disagree	fully disagree	disagree	fully disagree	agree	fully disagree	agree	agree	agree	disagree	disagree
0.317049	man	38	35 to 44 years	1	none	full time	Bac + 2	alone	24 to 36.000 €	Service and office worker		500 people or more	Industry	60	40	Long duration (39 to 50h)	never	never	rarely	Individual office	10	<15 minutes	no	2 to 4 periods	13	disagree	disagree	disagree	disagree	disagree	disagree	agree	agree	agree	agree	disagree	disagree	agree	disagree	agree	disagree	agree	disagree	disagree	disagree	agree	disagree	agree	disagree
0.9168	man	60	60 years and more	4	1	full time	< baccalaureate degree	En union libre	15 to 24.000 €	Workers		100 to 499 people	Industry	516	40	Long duration (39 to 50h)	never	never	Very often	production or workshop	20	16 to 30 minutes	no	never	21	fully agree	agree	agree	disagree	agree	agree	disagree	disagree	agree	agree	disagree	disagree	agree	disagree	disagree	agree	fully disagree	agree	agree	agree	agree	agree	disagree	disagree
0.300888	man	49	45 to 59 years	1	none	full time	Bac + 2	alone	Over 36.000 €	Technician and associate professional		500 people or more	Industry	118	37	Standard duration (Less than 39h)	rarely	rarely	Very often	open space	120	>1h30	no	never	12	fully disagree	fully agree	disagree	agree	agree	agree	fully disagree	agree	agree	agree	agree	disagree	agree	disagree	disagree	fully agree	fully agree	agree	fully agree	agree	agree	agree	disagree	disagree
0.696898	man	48	45 to 59 years	4	2	full time	< baccalaureate degree	En union libre	under 15.000 €	Service and office worker		50 to 99 people	trading	300	37	Standard duration (Less than 39h)	Very often	never	Very often	production or workshop	20	16 to 30 minutes	no	never	8	fully disagree	agree	fully disagree	disagree	fully disagree	disagree	disagree	agree	disagree	agree	disagree	fully agree	fully disagree	disagree	agree	fully disagree	fully disagree	agree	disagree	fully disagree	agree	fully disagree	disagree	disagree
1.14272	man	55	45 to 59 years	3	none	full time	Bac + 2	married/free union	under 15.000 €	Service and office worker		9 people or less	trading	1	60	Very Long duration (More than50h)	often	often	often	Individual office	30	16 to 30 minutes	no	2 to 4 periods	0	agree	agree	agree	agree	agree	agree	agree	agree	agree	agree	agree	agree	agree	agree	agree	agree	agree	agree	agree	agree	agree	agree	agree	agree
0.516099	woman	42	35 to 44 years	4	2	self employed	Bac + 2	married/free union	Over 36.000 €		Craftsman, shopkeeper, entrepreneur		other services	86	31	Standard duration (Less than 39h)	rarely	never	often	at customers	120	>1h30	a half day per week	never	9	agree	disagree		agree		agree		disagree	agree	fully agree	disagree	fully disagree	disagree	agree	fully disagree		disagree	agree	agree	agree	fully agree		disagree
1.35765	woman	37	35 to 44 years	4	2	full time	Baccalaureate degree	married/free union	Over 36.000 €	Workers		100 to 499 people	Industry	24	44	Long duration (39 to 50h)	rarely	Very often	rarely	production or workshop	55	46 to 60 minutes	no	1 period	7	disagree	agree	disagree	disagree	disagree	agree	disagree	agree	agree	disagree	agree	disagree	agree	agree	disagree	agree	disagree	agree	disagree	agree	agree	disagree	disagree	disagree
0.72966	man	58	45 to 59 years	4	1	self employed	< baccalaureate degree	married/free union	Over 36.000 €		Craftsman, shopkeeper, entrepreneur		other services	317	70	Very Long duration (More than50h)	often	never	rarely	production or workshop	30	16 to 30 minutes	no	1 period	15	disagree	agree		fully agree		agree		disagree	agree	fully agree	agree	disagree	agree	disagree	disagree		fully disagree	agree	disagree	agree	agree		agree
0.831419	man	42	35 to 44 years	4	2	full time	Bac + 3	married/free union	24 to 36.000 €	Technician and associate professional		500 people or more	Education, health and social work	125	40	Long duration (39 to 50h)	Very often	rarely	Very often	other	10	<15 minutes	no	never	38	disagree	agree	fully disagree	disagree	disagree	disagree	disagree	agree	agree	fully agree	agree	fully agree	fully disagree	disagree	agree	disagree	fully disagree	disagree	fully agree	agree	fully disagree	fully disagree	fully agree	agree
0.737241	man	50	45 to 59 years	1	none	full time	Bac + 2	alone	24 to 36.000 €	Senior managers		100 to 499 people	other services	24	40	Long duration (39 to 50h)	rarely	never	rarely	open space	60	46 to 60 minutes	no	never	17	disagree	agree	disagree	agree	agree	disagree	disagree	agree	agree	agree	agree	disagree	agree	agree	disagree	agree	agree	agree	agree	agree	disagree	agree	agree	agree
0.95138	woman	64	60 years and more	1	none	part time	< baccalaureate degree	alone	under 15.000 €	Service and office worker		10 to 49 people	trading	84	25	Standard duration (Less than 39h)	Very often	Very often	Very often	other	60	46 to 60 minutes	no	2 to 4 periods	11	disagree	fully disagree	agree	agree	fully agree	fully agree	fully disagree	agree	agree	disagree	fully disagree	disagree	fully agree	fully disagree	fully disagree	fully agree	disagree	fully agree	agree	agree	fully agree	agree	agree	disagree
0.755593	man	55	45 to 59 years	3	1	full time	Baccalaureate degree	married/free union	Over 36.000 €	Technician and associate professional		500 people or more	Transports	185	35	Standard duration (Less than 39h)	often	never	never	Commercial permises	6	<15 minutes	no	never	9	disagree	agree	fully disagree	fully disagree	fully disagree	agree	fully disagree	agree	agree	fully agree	disagree	agree	fully disagree	fully agree	agree	fully disagree	fully disagree	fully disagree	agree	agree	disagree	fully disagree	agree	fully agree
0.954467	woman	49	45 to 59 years	5 and more	3	full time	Bac + 2	married/free union		Technician and associate professional		100 to 499 people	Education, health and social work	312	35	Standard duration (Less than 39h)	Very often	never	never	other	20	16 to 30 minutes	no	never	0	disagree	agree	disagree	fully disagree	disagree	agree	agree	agree	disagree	agree	agree	agree	disagree	agree	agree	disagree	disagree	agree	agree	agree	agree	agree	agree	agree
0.963018	man	26	25 to 34 years	1	none	self employed	Baccalaureate degree	alone	15 to 24.000 €		Technician and associate professional Service and office worker Workers	9 people or less	Industry	24	40	Long duration (39 to 50h)	never	never	often	production or workshop	40	31 to 45 minutes	no	never	5	disagree	fully disagree		fully agree		fully agree		fully disagree	fully agree	fully disagree	fully disagree	fully disagree	agree	fully disagree	fully disagree		fully disagree	agree	fully disagree	fully agree	fully agree		agree
0.935412	man	33	25 to 34 years	4	2	full time	Bac + 2	married/free union		Technician and associate professional		500 people or more	other services	60	40	Long duration (39 to 50h)	Very often	often	Very often	Individual office	5	<15 minutes	no	1 period	18	fully disagree	agree	agree	agree	fully agree	agree	fully disagree	fully agree	agree	disagree	agree	fully agree	agree	disagree	fully disagree	fully agree	fully disagree	fully agree	agree	fully agree	agree	agree	agree	disagree
1.2765	woman	51	45 to 59 years	4	1	full time	< baccalaureate degree	married/free union	Over 36.000 €	Workers		100 to 499 people	building	180	35	Standard duration (Less than 39h)	never	never	never	production or workshop	10	<15 minutes	no	>4	18	agree	disagree	agree	agree	fully agree	fully agree	fully disagree	disagree	fully agree	disagree	disagree	fully disagree	agree	agree	disagree	agree	fully disagree	fully agree	disagree	agree	agree	disagree	fully disagree	disagree
1.3461	man	34	25 to 34 years	3	none	part time	Bac + 3	alone	under 15.000 €	Workers		50 to 99 people	other services	108	18	Standard duration (Less than 39h)	rarely	Very often	Very often	at customers	120	>1h30	no	never	26	agree	agree	agree	disagree	disagree	disagree	fully disagree	fully disagree	agree	fully agree	fully agree	agree	fully disagree	disagree	disagree	disagree	fully agree	fully agree	agree	agree	disagree	fully disagree	fully disagree	disagree
0.972312	man	30	25 to 34 years	5 and more	4 and more	full time	Bac + 3	married/free union	Over 36.000 €	Senior managers		10 to 49 people	Education, health and social work	63	35	Standard duration (Less than 39h)	rarely	never	never	Individual office	25	16 to 30 minutes	no	1 period	1	fully disagree	agree	fully agree	fully agree	fully agree	fully agree	fully agree	agree	fully agree	disagree	fully disagree	fully disagree	fully agree	fully disagree	fully disagree	fully agree	fully disagree	fully agree	fully disagree	fully agree	fully agree	fully agree	agree	disagree
0.389997	woman	54	45 to 59 years	5 and more	none	full time	Bac + 3	married/free union	Over 36.000 €	Senior managers		500 people or more	Industry	6	45	Long duration (39 to 50h)	never	never	never	open space	45	31 to 45 minutes	no	2 to 4 periods	17	fully disagree	agree	disagree	agree	agree	agree	agree	agree	agree	fully agree	agree	fully disagree	agree	disagree	fully disagree	agree	fully disagree	agree	disagree	agree	disagree	disagree	agree	disagree
0.307736	man	39	35 to 44 years	5 and more	3	full time	Bac + 3	married/free union	Over 36.000 €	Senior managers		500 people or more	Industry	31	60	Very Long duration (More than50h)	never	never	never	flex office	0	<15 minutes	no	2 to 4 periods	13	fully disagree	disagree	agree	fully agree	agree	agree	fully disagree	fully agree	agree	agree	agree	agree	fully agree	disagree	disagree	agree	agree	agree	agree	fully agree	agree	agree	fully agree	disagree
1.05603	man	42	35 to 44 years	4	2	part time	Baccalaureate degree	En union libre		Workers		100 to 499 people	trading	108	30	Standard duration (Less than 39h)	Very often	rarely	often	Commercial permises	10	<15 minutes	no	never	0	agree	agree	agree	agree	agree	agree	agree	agree	agree	agree	agree	agree	agree	agree	agree	agree	agree	agree	agree	agree	agree	agree	agree	agree
0.884632	man	55	45 to 59 years	3	none	full time	< baccalaureate degree	married/free union	15 to 24.000 €	Service and office worker		9 people or less	Transports	420	39	Long duration (39 to 50h)	Very often	never	often	production or workshop	80	1h to 1h30	no	never	7	fully disagree	fully agree	fully agree	fully agree	fully agree	fully agree	fully disagree	fully agree	fully agree	fully disagree	fully disagree	fully disagree	fully agree	fully disagree	fully disagree	fully agree	fully agree	fully agree	fully agree	fully agree	fully agree	fully agree	fully disagree	fully disagree
0.448361	woman	47	45 to 59 years	3	1	full time	Bac + 3	En union libre	Over 36.000 €	Senior managers		500 people or more	Transports	48	50	Long duration (39 to 50h)	often	rarely	often	Individual office	40	31 to 45 minutes	a half day per week	never	5	disagree	agree	agree	agree	agree	agree	disagree	fully agree	disagree	agree	agree	agree	agree	disagree	disagree	disagree	disagree	agree	fully agree	agree	agree	agree	agree	agree
1.03221	woman	40	35 to 44 years	4	2	full time	Bac + 2	married/free union	under 15.000 €	Technician and associate professional		10 to 49 people	Education, health and social work	180	40	Long duration (39 to 50h)	rarely	rarely	often	other	20	16 to 30 minutes	no	never	11	agree	agree	disagree	disagree	agree	agree	disagree	agree	agree	agree	disagree	disagree	agree	disagree	disagree	agree	fully disagree	agree	agree	agree	agree	disagree	agree	disagree
0.350625	man	29	25 to 34 years	4	2	full time	Bac + 2	En union libre	24 to 36.000 €	Technician and associate professional		500 people or more	Transports	24	40	Long duration (39 to 50h)	often	Very often	Very often	open space	15	<15 minutes	no	>4	78	agree	fully agree	fully disagree	fully disagree	fully disagree	fully disagree	fully agree	fully agree	fully disagree	fully agree	fully agree	fully agree	fully disagree	fully agree	fully agree	fully disagree	agree	fully disagree	fully agree	disagree	agree	fully disagree	fully agree	fully agree
0.785011	man	44	35 to 44 years	5 and more	3	full time	Bac + 2	married/free union	Over 36.000 €	Technician and associate professional		100 to 499 people	Transports	1	35	Standard duration (Less than 39h)	never	never	rarely	open space	40	31 to 45 minutes	no	2 to 4 periods	58	disagree	fully agree	fully agree	agree	agree	fully agree	fully disagree	fully agree	disagree	disagree	disagree	agree	agree	fully disagree	fully disagree	agree	agree	agree	agree	agree	fully agree	agree	agree	disagree
1.09906	man	29	25 to 34 years	2	none	full time	Baccalaureate degree	alone		Service and office worker		10 to 49 people	Transports	26	40	Long duration (39 to 50h)	Very often	never	rarely	Commercial permises	15	<15 minutes	no	1 period	9	disagree	agree	agree	disagree	agree	agree	disagree	disagree	agree	agree	disagree	disagree	agree	disagree	disagree	agree	disagree	agree	disagree	agree	agree	agree	disagree	disagree
0.991166	woman	49	45 to 59 years	3	none	full time	Bac + 2	married/free union		Service and office worker		500 people or more	Insurance and real estate	84	42	Long duration (39 to 50h)	rarely	rarely	Very often	open space	40	31 to 45 minutes	no	1 period	56	agree	agree	fully disagree	disagree	disagree	disagree	fully agree	fully agree	agree	fully agree	fully agree	agree	fully disagree	agree	agree	disagree	agree	agree	disagree	fully disagree	fully disagree	fully disagree	fully agree	agree
0.814826	man	45	45 to 59 years	4	2	full time	< baccalaureate degree	married/free union		Technician and associate professional		10 to 49 people	Education, health and social work	132	35	Standard duration (Less than 39h)	rarely	rarely	rarely	other	5	<15 minutes	no	never	21	disagree	agree	disagree	disagree	disagree	agree	disagree	agree	agree	agree	agree	disagree	agree	disagree	agree	disagree	fully disagree	agree	agree	agree	disagree	disagree	disagree	disagree
0.412614	man	28	25 to 34 years	2	none	full time	Bac + 2	alone	24 to 36.000 €	Service and office worker		500 people or more	other services	42	39	Long duration (39 to 50h)	never	never	never	open space	10	<15 minutes	no	never	11	agree	agree	disagree	disagree	agree	disagree	disagree	agree	agree	agree	agree	fully agree	agree	agree	disagree	agree	fully disagree	agree	disagree	agree	agree	agree	agree	disagree
0.964693	woman	53	45 to 59 years	2	none	full time	Baccalaureate degree	married/free union	24 to 36.000 €	Service and office worker		500 people or more	Education, health and social work	120	43	Long duration (39 to 50h)	never	never	rarely	open space	20	16 to 30 minutes	no	1 period	13	disagree	disagree	agree	agree	agree	agree	fully disagree	disagree	agree	fully disagree	disagree	fully disagree	fully agree	disagree	disagree	agree	fully disagree	agree	disagree	agree	agree	agree	disagree	disagree
1.06608	woman	40	35 to 44 years	5 and more	3	full time	Bac + 3	married/free union	Over 36.000 €	Technician and associate professional		500 people or more	Education, health and social work	210	35	Standard duration (Less than 39h)	rarely	never	never	other	20	16 to 30 minutes	no	never	13	fully disagree	fully agree	fully disagree	disagree	disagree	disagree	fully disagree	agree	fully agree	fully disagree	agree	fully agree	agree	agree	fully disagree	fully disagree	disagree	fully agree	disagree	fully agree	disagree	disagree	fully agree	agree
0.710059	man	53	45 to 59 years	4	2	full time	< baccalaureate degree	married/free union	24 to 36.000 €	Service and office worker		100 to 499 people	other services	240	35	Standard duration (Less than 39h)	Very often	Very often	Very often	other	80	1h to 1h30	no	2 to 4 periods	7	disagree	agree	agree	disagree	disagree	agree	fully disagree	agree	fully agree	disagree	disagree	agree	fully agree	disagree	agree	disagree	disagree	disagree	agree	agree	disagree	agree	agree	disagree
0.449938	woman	51	45 to 59 years	1	none	full time	< baccalaureate degree	alone	Over 36.000 €	Technician and associate professional		500 people or more	Transports	339	35	Standard duration (Less than 39h)	never	rarely	rarely	Individual office	20	16 to 30 minutes	no	never	8	agree	fully disagree	fully disagree	fully agree	disagree	fully agree	agree	agree	agree	fully agree	disagree	disagree	agree	agree	disagree	agree	fully disagree	agree	agree	agree	agree	agree	agree	agree
1.15653	man	55	45 to 59 years	1	none	full time	Bac + 3	alone	15 to 24.000 €	Senior managers		9 people or less	other services	240	40	Long duration (39 to 50h)	Very often	rarely	often	at home	180	>1h30		never	11	fully disagree	fully disagree	agree	fully agree	agree	agree	fully disagree	disagree	fully agree	fully disagree	agree	fully disagree	agree	fully disagree	fully disagree	fully disagree	disagree	agree	disagree	agree	agree	agree	disagree	fully disagree
1.00506	woman	58	45 to 59 years	2	none	part time	Baccalaureate degree	alone	under 15.000 €	Technician and associate professional		500 people or more	Education, health and social work	96	30	Standard duration (Less than 39h)	Very often	never	rarely	other	10	<15 minutes	no	1 period	14	agree	agree	agree	agree	disagree	disagree	disagree	disagree	fully agree	agree	disagree	agree	agree	disagree	agree	agree	disagree	agree	disagree	disagree	agree	disagree	disagree	disagree
1.28664	woman	38	35 to 44 years	2	none	self employed	Bac + 2	En union libre	under 15.000 €		Farmers		other services	42	50	Long duration (39 to 50h)	Very often	often	often	at home	60	46 to 60 minutes		>4	36	disagree	disagree		fully agree		agree		agree	agree	agree	agree	disagree	agree	disagree	fully disagree		fully disagree	agree	agree	agree	disagree		agree
0.780776	man	55	45 to 59 years	3	1	full time	Bac + 2	married/free union	Over 36.000 €	Senior managers		100 to 499 people	Education, health and social work	310	25	Standard duration (Less than 39h)	never	never	often	other	10	<15 minutes	no	never	28	fully disagree	agree	agree	disagree	disagree	disagree	fully disagree	fully disagree	agree	disagree	fully disagree	disagree	fully agree	fully disagree	agree	disagree	fully disagree	disagree	fully disagree	agree	disagree	fully agree	agree	fully disagree
1.49506	woman	43	35 to 44 years	3	1	full time	Baccalaureate degree	En union libre	Over 36.000 €	Service and office worker		9 people or less	trading	66	39	Long duration (39 to 50h)	rarely	never	never	at customers	5	<15 minutes	no	2 to 4 periods	32	disagree	agree	disagree	disagree	disagree	agree	disagree	disagree	agree	agree	agree	disagree	disagree	disagree	fully agree	disagree	fully disagree	agree	agree	agree	agree	agree	disagree	disagree
0.350625	man	28	25 to 34 years	4	2	full time	Bac + 3	married/free union	24 to 36.000 €	Technician and associate professional		500 people or more	Insurance and real estate	50	35	Standard duration (Less than 39h)	rarely	rarely	often	Individual office	90	1h to 1h30	no	never	5	agree	fully agree	agree	agree	fully agree	agree	agree	agree	fully agree	disagree	agree	fully agree	agree	agree	disagree	agree	agree	agree	agree	agree	disagree	disagree	agree	agree
0.814826	man	46	45 to 59 years	4	1	full time	Bac + 2	married/free union	Over 36.000 €	Technician and associate professional		10 to 49 people	Industry	216	35	Standard duration (Less than 39h)	rarely	never	Very often	Commercial permises	60	46 to 60 minutes	no	1 period	14	agree	agree	disagree	agree	agree	agree	disagree	disagree	agree	agree	agree	disagree	disagree	agree	disagree	agree	disagree	disagree	agree	agree	agree	agree	disagree	disagree
1.31115	woman	38	35 to 44 years	5 and more	3	full time	< baccalaureate degree	married/free union	24 to 36.000 €	Workers		100 to 499 people	other services	50	32	Standard duration (Less than 39h)	often	often	never	production or workshop	30	16 to 30 minutes	no	never	30	agree	agree	agree	agree	agree	agree	agree	agree	agree	agree	agree	agree	agree	agree	agree	agree	agree	agree	agree	agree	agree	agree	agree	agree
2.27634	woman	31	25 to 34 years	2	none	part time	Bac + 2	married/free union	24 to 36.000 €	Workers		9 people or less	Education, health and social work	60	22	Standard duration (Less than 39h)	never	never	never	other	360	>1h30	no	2 to 4 periods	9	agree	fully disagree	disagree	fully disagree	fully disagree	disagree	disagree	disagree	fully agree	agree	disagree	disagree	disagree	disagree	disagree	disagree	agree	disagree	agree	fully disagree	agree	fully disagree	agree	fully disagree
0.739479	man	48	45 to 59 years	5 and more	none	full time	Baccalaureate degree	married/free union	Over 36.000 €	Technician and associate professional		100 to 499 people	Education, health and social work	300	35	Standard duration (Less than 39h)	often	never	Very often	other	15	<15 minutes	no	never	15	agree	agree	agree	disagree	disagree	agree	fully disagree	disagree	fully agree	fully disagree	agree	agree	fully agree	fully disagree	disagree	disagree	fully disagree	agree	fully agree	fully agree	fully agree	agree	agree	disagree
1.47849	man	51	45 to 59 years	5 and more	none	self employed	Bac + 3	married/free union	Over 36.000 €		Senior managers		Insurance and real estate	300	60	Very Long duration (More than50h)	Very often	rarely	Very often	Individual office	15	<15 minutes	more than one day a week	never	21	agree	disagree		fully agree		agree		agree	disagree	agree	fully agree	disagree	fully agree	disagree	fully disagree		fully disagree	agree	fully agree	agree	disagree		fully agree
1.14636	woman	30	25 to 34 years	2	none	part time	Baccalaureate degree	En union libre		Service and office worker		9 people or less	other services	78	32	Standard duration (Less than 39h)	never	never	never	other	10	<15 minutes	no	2 to 4 periods	15	agree	agree	disagree	agree	agree	agree	disagree	disagree	agree	agree	agree	disagree	agree	disagree	fully disagree	agree	fully disagree	fully agree	disagree	agree	disagree	agree	disagree	disagree
0.849569	man	35	35 to 44 years	3	1	self employed	Baccalaureate degree	married/free union	15 to 24.000 €		Craftsman, shopkeeper, entrepreneur		Industry	24	50	Long duration (39 to 50h)	Very often	never	never	production or workshop	20	16 to 30 minutes	no	1 period	6	disagree	disagree		fully agree		agree		disagree	fully agree	agree	agree	disagree	agree	disagree	disagree		disagree	disagree	agree	agree	agree		disagree
1.13682	woman	28	25 to 34 years	3	1	full time	Bac + 3	married/free union	24 to 36.000 €	Technician and associate professional		100 to 499 people	Education, health and social work	30	35	Standard duration (Less than 39h)	never	never	never	open space	120	>1h30	no	never	16	disagree	fully disagree	disagree	agree	agree	agree	fully disagree	disagree	agree	agree	disagree	disagree	agree	fully disagree	agree	fully agree	disagree	fully agree	disagree	agree	fully agree	fully disagree	disagree	disagree
1.01745	man	44	35 to 44 years	4	2	self employed	Bac + 2	married/free union	under 15.000 €		Craftsman, shopkeeper, entrepreneur	9 people or less	Transports	0	35	Standard duration (Less than 39h)	Very often	Very often	Very often	external site	0	<15 minutes	no	never	14	agree	agree		agree		agree		agree	agree	agree	agree	agree	agree	agree	agree		agree	agree	agree	agree	agree		agree
0.831419	man	44	35 to 44 years	3	1	full time	Bac + 3	En union libre	Over 36.000 €	Technician and associate professional		100 to 499 people	Education, health and social work	163	35	Standard duration (Less than 39h)	rarely	never	never	other	50	46 to 60 minutes	no	1 period	17	disagree	disagree	disagree	disagree	agree	agree	agree	disagree	agree	disagree	disagree	agree	agree	disagree	disagree	agree	disagree	disagree	agree	agree	agree	disagree	agree	disagree
0.776928	man	43	35 to 44 years	1	none	full time	Bac + 2	alone	15 to 24.000 €	Technician and associate professional		50 to 99 people	other services	209	36	Standard duration (Less than 39h)	rarely	never	never	flex office	100	>1h30	no	1 period	19	fully agree	agree	agree	fully disagree	fully disagree	disagree	disagree	agree	disagree	disagree	fully agree	disagree	agree	fully disagree	agree	disagree	agree	disagree	disagree	disagree	fully disagree	disagree	agree	fully agree
1.03487	woman	37	35 to 44 years	1	none	full time	Bac + 3	alone	24 to 36.000 €	Senior managers		500 people or more	other services	7	39	Long duration (39 to 50h)	never	never	rarely	Individual office	35	31 to 45 minutes	no	1 period	9	fully disagree	disagree	agree	disagree	agree	agree	fully disagree	fully disagree	disagree	agree	fully disagree	disagree	agree	fully disagree	fully disagree	agree	fully disagree	agree	disagree	fully agree	disagree	fully disagree	disagree	fully disagree
3.74925	man	18	18 to 24 years	4	none	full time	Baccalaureate degree	alone	under 15.000 €	Workers		10 to 49 people	Industry	5	35	Standard duration (Less than 39h)	often	never	Very often	production or workshop	35	31 to 45 minutes	no	1 period	47	agree	disagree	agree	agree	disagree	fully disagree	disagree	agree	agree	agree	disagree	fully agree	fully disagree	agree	fully agree	disagree	disagree	agree	fully agree	fully disagree	fully disagree	disagree	fully agree	fully agree
1.40088	man	39	35 to 44 years	4	2	full time	Bac + 3	married/free union	Over 36.000 €	Senior managers		9 people or less	Education, health and social work	168	25	Standard duration (Less than 39h)	rarely	never	never	open space	30	16 to 30 minutes	no	never	10	agree	agree	fully disagree	fully disagree	fully disagree	agree	fully disagree	fully disagree	fully agree	fully agree	fully disagree	agree	agree	fully disagree	fully agree	fully disagree	fully disagree	agree	fully agree	fully agree	agree	fully disagree	disagree	fully agree
0.956699	man	54	45 to 59 years	1	none	full time	Baccalaureate degree	alone	15 to 24.000 €	Workers		50 to 99 people	Transports	165	35	Standard duration (Less than 39h)	often	rarely	often	other	45	31 to 45 minutes	no	2 to 4 periods	54	fully agree	agree	fully disagree	fully disagree	fully disagree	disagree	disagree	disagree	disagree	fully agree	disagree	agree	fully disagree	agree	fully agree	fully disagree	disagree	fully disagree	fully agree	agree	agree	fully agree	agree	disagree
0.449435	woman	31	25 to 34 years	4	2	full time	Bac + 2	En union libre	Over 36.000 €	Service and office worker		500 people or more	Insurance and real estate	1	35	Standard duration (Less than 39h)	never	never	never	open space	25	16 to 30 minutes	no	1 period	20	disagree	agree	agree	fully disagree	disagree	fully agree	fully disagree	fully agree	fully agree	fully agree	agree	disagree	agree	fully agree	fully disagree	agree	fully disagree	fully agree	agree	agree	fully agree	fully disagree	fully agree	disagree
0.929603	woman	54	45 to 59 years	4	1	full time	Baccalaureate degree	married/free union	Over 36.000 €	Service and office worker		50 to 99 people	Education, health and social work	63	40	Long duration (39 to 50h)	Very often	never	often	at customers	90	1h to 1h30	more than one day a week	2 to 4 periods	22	disagree	fully agree	fully agree	agree	disagree	agree	fully disagree	agree	fully agree	disagree	agree	disagree	agree	fully disagree	disagree	agree	disagree	agree	fully agree	fully agree	agree	agree	disagree	disagree
0.745917	man	50	45 to 59 years	2	none	full time	Baccalaureate degree	En union libre	24 to 36.000 €	Service and office worker		10 to 49 people	other services	265	39	Long duration (39 to 50h)	rarely	never	often	other	60	46 to 60 minutes	no	never	15	disagree	disagree	agree	agree	agree	agree	fully disagree	agree	agree	agree	agree	agree	agree	disagree	disagree	agree	disagree	agree	disagree	agree	agree	agree	disagree	fully disagree
1.07639	woman	47	45 to 59 years	1	none	full time	< baccalaureate degree	alone		Service and office worker		100 to 499 people	other services	180	8	Standard duration (Less than 39h)	never	never	never	open space	70	1h to 1h30	no	2 to 4 periods	45	fully agree	agree	disagree	fully disagree	disagree	disagree	agree	agree	disagree	fully disagree	disagree	disagree	agree	disagree	agree	disagree	disagree	agree	fully disagree	agree	agree	disagree	disagree	agree
0.346488	man	28	25 to 34 years	2	none	full time	Bac + 2	En union libre	under 15.000 €	Service and office worker		500 people or more	Education, health and social work	36	39	Long duration (39 to 50h)	never	never	never	open space	60	46 to 60 minutes	no	2 to 4 periods	33	agree	fully agree	agree	fully disagree	disagree	agree	fully disagree	agree	agree	fully agree	fully agree	disagree	disagree	disagree	fully agree	agree	disagree	agree	agree	agree	agree	fully disagree	fully agree	fully agree
0.908675	woman	48	45 to 59 years	2	none	full time	Bac + 2	married/free union	Over 36.000 €	Service and office worker		100 to 499 people	building	312	40	Long duration (39 to 50h)	never	never	never	open space	20	16 to 30 minutes	no	never	21	disagree	agree	disagree	fully disagree	disagree	agree	fully disagree	agree	agree	disagree	agree	agree	agree	disagree	disagree	agree	fully disagree	fully agree	disagree	agree	agree	disagree	agree	disagree
0.996703	woman	51	45 to 59 years	1	none	full time	< baccalaureate degree	alone	under 15.000 €	Service and office worker		10 to 49 people	Industry	288	39	Long duration (39 to 50h)	never	never	never	Individual office	18	16 to 30 minutes	no	1 period	21	agree	fully disagree	agree	agree	agree	fully agree	disagree	disagree	agree	fully disagree	agree	fully disagree	fully agree	disagree	fully disagree	fully agree	disagree	agree	agree	fully agree	fully disagree	agree	agree	fully disagree
0.773111	man	51	45 to 59 years	3	none	full time	< baccalaureate degree	married/free union	Over 36.000 €	Service and office worker		10 to 49 people	other services	72	50	Long duration (39 to 50h)	Very often	Very often	Very often	other	5	<15 minutes	no	never	19	disagree	agree	agree	agree	agree	agree	disagree	agree	agree	agree	agree	agree	agree	agree	disagree	agree	disagree	agree	agree	agree	agree	agree	agree	agree
1.09543	man	52	45 to 59 years	3	1	full time	Baccalaureate degree	En union libre	24 to 36.000 €	Workers		10 to 49 people	trading	216	39	Long duration (39 to 50h)	never	never	never	Individual office	10	<15 minutes	no	never	11	disagree	disagree	agree	agree	agree	agree	fully disagree	disagree	agree	agree	disagree	disagree	agree	disagree	disagree	fully agree	fully disagree	agree	disagree	agree	agree	agree	disagree	disagree
0.366819	man	37	35 to 44 years	2	none	full time	Bac + 3	married/free union		Senior managers		500 people or more	Industry	151	50	Long duration (39 to 50h)	rarely	rarely	rarely	open space	50	46 to 60 minutes	no	never	16	disagree	disagree	agree	fully agree	agree	fully agree	fully disagree	agree	agree	disagree	agree	fully disagree	fully agree	fully disagree	fully disagree	fully agree	disagree	agree	disagree	agree	agree	agree	agree	fully disagree
1.00506	woman	53	45 to 59 years	3	1	full time	Bac + 3	alone	24 to 36.000 €	Technician and associate professional		100 to 499 people	Education, health and social work	318	19	Standard duration (Less than 39h)	never	never	never	at home	5	<15 minutes		never	13	disagree	fully disagree	agree	fully disagree	agree	agree	fully agree	disagree	agree	agree	disagree	fully disagree	agree	fully disagree	disagree	agree	fully disagree	fully agree	agree	fully agree	agree	agree	fully agree	disagree
0.850127	man	33	25 to 34 years	2	none	full time	Bac + 2	En union libre	24 to 36.000 €	Service and office worker		100 to 499 people	trading	12	39	Long duration (39 to 50h)	Very often	never	Very often	Individual office	40	31 to 45 minutes	no	never	10	fully disagree	agree	disagree	agree	agree	agree	fully disagree	disagree	agree	disagree	disagree	disagree	agree	fully disagree	fully disagree	agree	fully disagree	agree	fully disagree	agree	agree	agree	disagree	disagree
0.771008	man	49	45 to 59 years	4	1	full time	Baccalaureate degree	married/free union	Over 36.000 €	Service and office worker		100 to 499 people	other services	336	35	Standard duration (Less than 39h)	often	often	often	open space	600	>1h30	no	never	21	disagree	fully agree	agree	fully agree	agree	fully agree	fully disagree	agree	agree	disagree	disagree	disagree	agree	disagree	disagree	agree	fully disagree	agree	disagree	fully agree	agree	agree	agree	fully disagree
1.09833	woman	31	25 to 34 years	4	2	full time	Bac + 2	married/free union	24 to 36.000 €	Senior managers		100 to 499 people	other services	120	40	Long duration (39 to 50h)	often	never	rarely	Individual office	40	31 to 45 minutes	no	never	15	fully disagree	fully disagree	agree	fully agree	agree	fully agree	disagree	agree	agree	disagree	agree	disagree	agree	disagree	fully disagree	disagree	fully disagree	fully agree	agree	fully agree	agree	fully agree	agree	disagree
0.707958	man	50	45 to 59 years	5 and more	2	full time	Bac + 3	married/free union	Over 36.000 €	Senior managers		50 to 99 people	trading	204	48	Long duration (39 to 50h)	Very often	rarely	rarely	Commercial permises	45	31 to 45 minutes	no	2 to 4 periods	12	disagree	disagree	fully disagree	agree	disagree	agree	fully disagree	agree	agree	agree	disagree	disagree	disagree	disagree	disagree	disagree	fully disagree	agree	disagree	disagree	agree	disagree	disagree	agree
1.02243	man	43	35 to 44 years	1	none	full time	Bac + 2	alone	under 15.000 €	Workers		100 to 499 people	other services	6	40	Long duration (39 to 50h)	rarely	never	rarely	external site	10	<15 minutes	no	>4	23	agree	fully agree	disagree	disagree	disagree	agree	fully agree	agree	disagree	agree	agree	agree	disagree	fully agree	agree	disagree	disagree	fully disagree	fully agree	disagree	agree	disagree	agree	disagree
0.998466	man	50	45 to 59 years	4	1	full time	< baccalaureate degree	married/free union		Workers		100 to 499 people	Industry	82	41	Long duration (39 to 50h)	Very often	rarely	often	Commercial permises	30	16 to 30 minutes	no	1 period	11	agree	agree	disagree	agree	agree	agree	fully disagree	agree	fully agree	disagree	disagree	disagree	agree	disagree	disagree	agree	fully disagree	agree	agree	agree	agree	agree	agree	disagree
1.45509	woman	46	45 to 59 years	3	2	part time	Baccalaureate degree	married/free union	under 15.000 €	Service and office worker		9 people or less	Education, health and social work	120	100	Very Long duration (More than50h)	often	never	often	at customers	30	16 to 30 minutes	no	never	42	agree	agree	disagree	disagree	agree	agree	agree	agree	agree	agree	fully agree	disagree	disagree	fully agree	disagree	fully agree	fully agree	agree	agree	agree	agree	fully disagree	fully agree	fully agree
0.320713	man	42	35 to 44 years	2	none	full time	Bac + 3	married/free union	24 to 36.000 €	Technician and associate professional		500 people or more	other services	90	42	Long duration (39 to 50h)	Very often	never	often	at customers	90	1h to 1h30	no	never	21	disagree	disagree	agree	agree	agree	agree	agree	agree	agree	disagree	disagree	agree	fully agree	agree	agree	agree	disagree	agree	agree	fully agree	agree	agree	agree	disagree
0.995552	man	57	45 to 59 years	4	2	full time	Bac + 2	married/free union	Over 36.000 €	Workers		100 to 499 people	building	36	35	Standard duration (Less than 39h)	rarely	rarely	often	at customers	30	16 to 30 minutes	a half day per week	1 period	11	fully disagree	fully agree	agree	agree	agree	fully agree	fully disagree	fully agree	fully agree	disagree	agree	fully disagree	agree	disagree	fully disagree	agree	agree	fully agree	agree	agree	agree	agree	agree	disagree
0.970245	woman	58	45 to 59 years	2	none	full time	Bac + 3	married/free union	Over 36.000 €	Senior managers		50 to 99 people	Education, health and social work	249	50	Long duration (39 to 50h)	rarely	never	rarely	Individual office	30	16 to 30 minutes	a half day per week	never	35	disagree	disagree	agree	agree	agree	agree	fully disagree	fully agree	agree	agree	agree	agree	agree	disagree	disagree	agree	disagree	fully agree	agree	disagree	agree	agree	agree	disagree
1.03237	woman	49	45 to 59 years	1	none	part time	< baccalaureate degree	alone	under 15.000 €	Service and office worker		10 to 49 people	other services	48	20	Standard duration (Less than 39h)	never	never	never	open space	0	<15 minutes	no	1 period	19	disagree	agree	agree	agree	fully agree	fully agree	fully disagree	disagree	agree	agree	disagree	agree	agree	disagree	fully disagree	fully agree	fully disagree	fully agree	disagree	fully agree	agree	agree	disagree	disagree
1.06608	woman	39	35 to 44 years	4	2	part time	Bac + 3	married/free union	Over 36.000 €	Technician and associate professional		9 people or less	Education, health and social work	210	40	Long duration (39 to 50h)	often	never	rarely	other	20	16 to 30 minutes	more than one day a week	never	22	disagree	disagree	disagree	agree	agree	agree	fully disagree	agree	agree	agree	disagree	disagree	agree	agree	fully disagree	agree	disagree	fully agree	agree	agree	agree	agree	disagree	disagree
0.826787	man	59	45 to 59 years	1	none	full time	Baccalaureate degree	alone	15 to 24.000 €	Service and office worker		50 to 99 people	trading	360	35	Standard duration (Less than 39h)	often	never	never	Commercial permises	45	31 to 45 minutes	no	never	5	agree	disagree	agree	disagree	disagree	agree	disagree	disagree	agree	agree	agree	disagree	disagree	agree	agree	agree	agree	disagree	disagree	agree	agree	disagree	disagree	disagree
0.983018	woman	37	35 to 44 years	2	1	full time	Baccalaureate degree	alone	15 to 24.000 €	Service and office worker		50 to 99 people	Education, health and social work	18	35	Standard duration (Less than 39h)	Very often	Very often	Very often	other	15	<15 minutes	no	2 to 4 periods	34	disagree	agree	agree	fully disagree	disagree	disagree	fully disagree	fully disagree	disagree	fully agree	agree	disagree	agree	disagree	disagree	disagree	disagree	disagree	fully agree	agree	fully disagree	fully disagree	agree	agree
0.804468	man	44	35 to 44 years	5 and more	3	full time	Bac + 3	married/free union	15 to 24.000 €	Senior managers		500 people or more	Education, health and social work	6	39	Long duration (39 to 50h)	rarely	never	rarely	open space	7	<15 minutes	no	1 period	8	fully disagree	disagree	fully disagree	disagree	fully disagree	agree	fully disagree	agree	fully agree	agree	disagree	disagree	agree	disagree	disagree	disagree	fully disagree	agree	agree	agree	agree	agree	disagree	fully disagree
0.363885	man	28	25 to 34 years	3	none	full time	< baccalaureate degree	alone	Over 36.000 €	Technician and associate professional		500 people or more	other services	53	35	Standard duration (Less than 39h)	rarely	never	never	external site	10	<15 minutes	no	1 period	9	disagree	agree	agree	agree	fully agree	agree	agree	disagree	agree	disagree	fully disagree	disagree	fully agree	fully disagree	fully disagree	agree	disagree	agree	agree	agree	agree	agree	disagree	fully disagree
1.26832	man	28	25 to 34 years	3	1	full time	Baccalaureate degree	En union libre	Over 36.000 €	Workers		10 to 49 people	other services	84	39	Long duration (39 to 50h)	rarely	often	often	external site	60	46 to 60 minutes	no	never	5	disagree	fully disagree	fully agree	fully agree	fully agree	fully agree	fully agree	fully agree	agree	agree	disagree	fully agree	agree	fully agree	fully agree	fully agree	disagree	fully agree	agree	fully agree	agree	agree	disagree	agree
0.87686	man	27	25 to 34 years	2	none	full time	Bac + 2	alone		Technician and associate professional		50 to 99 people	Insurance and real estate	12	39	Long duration (39 to 50h)	Very often	never	never	Individual office	10	<15 minutes	no	1 period	10	agree	fully agree	disagree	agree	agree	agree	disagree	agree	fully agree	agree	disagree	agree	agree	disagree	disagree	disagree	fully disagree	disagree	agree	agree	agree	disagree	agree	fully disagree
1.03221	woman	35	35 to 44 years	4	2	part time	Bac + 3	married/free union	24 to 36.000 €	Technician and associate professional		9 people or less	Education, health and social work	127	40	Long duration (39 to 50h)	Very often	never	never	other	10	<15 minutes	no	never	12	fully disagree	fully disagree	fully agree	fully agree	agree	agree	fully disagree	fully disagree	agree	disagree	disagree	fully disagree	agree	fully disagree	disagree	agree	fully disagree	fully agree	fully disagree	fully agree	disagree	fully agree	agree	fully disagree
0.935376	man	30	25 to 34 years	2	none	full time	Bac + 3	married/free union	Over 36.000 €	Senior managers		10 to 49 people	other services	18	50	Long duration (39 to 50h)	often	rarely	often	Individual office	30	16 to 30 minutes	no	1 period	10	disagree	agree	disagree	agree	disagree	agree	disagree	fully agree	agree	fully agree	agree	disagree	agree	agree	disagree	agree	disagree	disagree	agree	agree	agree	agree	agree	disagree
0.377949	woman	58	45 to 59 years	3	none	full time	Bac + 2	En union libre		Technician and associate professional		500 people or more	Education, health and social work	2	35	Standard duration (Less than 39h)	rarely	never	never	open space	15	<15 minutes	no	1 period	17	disagree	disagree	disagree	agree	agree	agree	fully disagree	agree	agree	disagree	disagree	fully disagree	agree	disagree	disagree	agree	fully disagree	agree	agree	agree	agree	agree	agree	disagree
0.30139	man	59	45 to 59 years	2	none	full time	Baccalaureate degree	married/free union	24 to 36.000 €	Technician and associate professional		500 people or more	Industry	66	35	Standard duration (Less than 39h)	never	never	rarely	open space	70	1h to 1h30	no	1 period	59	fully agree	agree	disagree	disagree	disagree	agree	disagree	agree	fully disagree	fully agree	agree	agree	disagree	disagree	fully agree	disagree	disagree	fully disagree	agree	fully disagree	agree	fully disagree	fully agree	agree
1.0947	woman	41	35 to 44 years	1	none	full time	Bac + 3	alone	under 15.000 €	Service and office worker		10 to 49 people	Insurance and real estate	66	38	Standard duration (Less than 39h)	never	never	never	open space	30	16 to 30 minutes	no	2 to 4 periods	43	agree	agree	disagree	fully disagree	fully disagree	fully disagree	agree	agree	disagree	fully agree	fully agree	fully agree	agree	fully agree	fully agree	disagree	agree	disagree	agree	disagree	disagree	fully disagree	agree	fully agree
1.12159	man	41	35 to 44 years	4	2	full time	Baccalaureate degree	married/free union		Workers		10 to 49 people	Industry	18	35	Standard duration (Less than 39h)	never	never	often	production or workshop	25	16 to 30 minutes	no	2 to 4 periods	18	disagree	disagree	fully agree	agree	fully agree	fully agree	fully disagree	disagree	fully agree	disagree	disagree	disagree	fully agree	fully disagree	fully disagree	fully agree	agree	agree	agree	fully agree	fully agree	agree	disagree	fully disagree
0.346125	man	46	45 to 59 years	1	none	full time	Baccalaureate degree	alone	15 to 24.000 €	Technician and associate professional		500 people or more	Education, health and social work	206	35	Standard duration (Less than 39h)	never	never	rarely	open space	30	16 to 30 minutes	no	1 period	0	fully agree	fully agree	fully agree	fully agree	fully agree	fully agree	fully agree	disagree	fully agree	fully agree	fully agree	fully disagree	fully agree	fully agree	disagree	fully agree	fully agree	fully agree	fully agree	fully agree	fully agree	disagree	agree	fully agree
1.4607	woman	57	45 to 59 years	2	none	part time	< baccalaureate degree	married/free union	24 to 36.000 €	Service and office worker		9 people or less	other services	147	28	Standard duration (Less than 39h)	rarely	never	often	other	20	16 to 30 minutes	no	never	42	agree	disagree	disagree	disagree	disagree	agree	agree	disagree	agree	disagree	disagree	disagree	agree	disagree	disagree	disagree	fully disagree	agree	fully disagree	disagree	disagree	disagree	fully disagree	disagree
0.908675	woman	47	45 to 59 years	3	none	part time	< baccalaureate degree	married/free union	Over 36.000 €	Service and office worker		100 to 499 people	trading	164	32	Standard duration (Less than 39h)	Very often	never	rarely	Commercial permises	5	<15 minutes	no	never	19	disagree	disagree	fully disagree	disagree	disagree	agree	fully disagree	fully disagree	fully agree	disagree	agree	agree	disagree	agree	disagree	disagree	fully disagree	agree	fully disagree	disagree	agree	fully disagree	disagree	agree
0.932649	man	28	25 to 34 years	2	none	full time	Bac + 3	En union libre	24 to 36.000 €	Service and office worker		10 to 49 people	trading	32	40	Long duration (39 to 50h)	Very often	rarely	Very often	other	12	<15 minutes	no	1 period	20	disagree	agree	agree	agree	disagree	disagree	disagree	agree	disagree	fully agree	fully agree	fully agree	agree	agree	disagree	disagree	fully disagree	disagree	fully agree	agree	disagree	agree	agree	agree
0.753313	woman	34	25 to 34 years	1	none	self employed	Bac + 3	alone	Over 36.000 €		Senior managers	9 people or less	Education, health and social work	150	60	Very Long duration (More than50h)	often	rarely	rarely	Individual office	10	<15 minutes	no	never	8	disagree	agree		fully agree		agree		agree	agree	disagree	agree	disagree	fully agree	disagree	disagree		disagree	fully agree	fully agree	fully agree	agree		agree
0.775767	man	56	45 to 59 years	1	none	full time	Baccalaureate degree	alone	15 to 24.000 €	Service and office worker		10 to 49 people	Industry	408	35	Standard duration (Less than 39h)	never	never	never	open space	6	<15 minutes	no	never	9	disagree	disagree	disagree	fully disagree	fully disagree	disagree	fully disagree	agree	agree	agree	agree	fully disagree	fully disagree	agree	agree	disagree	fully disagree	agree	disagree	disagree	agree	fully disagree	disagree	disagree
1.13663	woman	58	45 to 59 years	2	none	full time	< baccalaureate degree	alone	15 to 24.000 €	Service and office worker		500 people or more	other services	300	35	Standard duration (Less than 39h)	often	never	never	other	20	16 to 30 minutes	no	>4	8	disagree	fully agree	fully agree	agree	agree	fully agree	fully agree	fully agree	fully agree	fully disagree	fully disagree	fully agree	agree	fully disagree	agree	fully agree	fully disagree	fully agree	agree	fully agree	fully agree	agree	fully agree	fully disagree
1.00235	woman	48	45 to 59 years	1	none	full time	Bac + 3	En union libre		Senior managers		10 to 49 people	Education, health and social work	288	35	Standard duration (Less than 39h)	often	never	often	other	20	16 to 30 minutes	no	never	20	disagree	agree	disagree	fully disagree	disagree	disagree	agree	agree	agree	disagree	agree	agree	disagree	agree	fully agree	fully disagree	disagree	disagree	agree	disagree	disagree	disagree	agree	agree
0.782683	man	39	35 to 44 years	3	1	full time	Bac + 3	married/free union	Over 36.000 €	Senior managers		100 to 499 people	Insurance and real estate	206	38	Standard duration (Less than 39h)	often	often	often	flex office	30	16 to 30 minutes	1 day per week	never	15	fully agree	fully agree	disagree	disagree	disagree	agree	disagree	fully agree	disagree	disagree	fully disagree	fully agree	fully disagree	agree	agree	fully disagree	agree	disagree	fully agree	disagree	disagree	disagree	disagree	fully agree
0.946742	man	40	35 to 44 years	5 and more	3	self employed	Bac + 3	married/free union	24 to 36.000 €		Technician and associate professional Service and office worker Workers	9 people or less	other services	59	30	Standard duration (Less than 39h)	rarely	never	rarely	at home	30	16 to 30 minutes		2 to 4 periods	14	agree	disagree		disagree		agree		fully disagree	disagree	agree	agree	agree	disagree	disagree	agree		fully disagree	disagree	disagree	disagree	disagree		agree
0.8321	man	38	35 to 44 years	1	none	full time	Bac + 3	alone	24 to 36.000 €	Senior managers		10 to 49 people	other services	96	45	Long duration (39 to 50h)	rarely	rarely	often	at home	0	<15 minutes		1 period	11	agree	fully agree	disagree	disagree	agree	agree	fully disagree	agree	agree	agree	agree	agree	disagree	disagree	disagree	disagree	fully disagree	agree	agree	disagree	agree	disagree	agree	agree
0.783203	man	56	45 to 59 years	2	none	full time	Bac + 2	married/free union	Over 36.000 €	Technician and associate professional		10 to 49 people	Education, health and social work	151	40	Long duration (39 to 50h)	Very often	rarely	often	Individual office	30	16 to 30 minutes	no	never	39	fully disagree	fully agree	agree	agree	disagree	agree	fully disagree	fully agree	agree	fully agree	fully agree	agree	agree	fully agree	disagree	disagree	fully disagree	fully agree	agree	agree	agree	agree	agree	disagree
1.22147	woman	46	45 to 59 years	2	1	full time	Baccalaureate degree	alone	under 15.000 €	Workers		50 to 99 people	Industry	4	35	Standard duration (Less than 39h)	never	never	Very often	production or workshop	15	<15 minutes	no	2 to 4 periods	6	agree	fully agree	disagree	disagree	agree	disagree	fully disagree	agree	agree	agree	disagree	fully disagree	disagree	agree	disagree	agree	fully disagree	agree	fully disagree	agree	fully agree	disagree	fully agree	disagree
0.678472	man	51	45 to 59 years	2	none	self employed	< baccalaureate degree	married/free union	Over 36.000 €		Technician and associate professional Service and office worker Workers	9 people or less	other services	288	35	Standard duration (Less than 39h)	Very often	Very often	Very often	other	30	16 to 30 minutes	no	1 period	7	fully disagree	fully agree		agree		agree		fully agree	fully agree	agree	fully disagree	agree	agree	fully disagree	fully disagree		fully disagree	agree	fully agree	fully agree	agree		fully agree
2.3808	man	71	60 years and more	2	none	self employed	Bac + 3	married/free union	Over 36.000 €		Senior managers		Education, health and social work	120	10	Standard duration (Less than 39h)	Very often	never	rarely	at customers	40	31 to 45 minutes	no	never	8	fully disagree	disagree		agree		fully agree		agree	fully agree	disagree	fully disagree	fully disagree	fully agree	disagree	fully disagree		disagree	agree	disagree	fully agree	fully agree		disagree
0.290293	man	53	45 to 59 years	3	1	full time	< baccalaureate degree	married/free union	Over 36.000 €	Technician and associate professional		500 people or more	Industry	432	35	Standard duration (Less than 39h)	never	never	never	Individual office	30	16 to 30 minutes	no	never	10	disagree	agree	disagree	agree	disagree	agree	disagree	agree	agree	agree	agree	disagree	agree	disagree	agree	disagree	disagree	disagree	agree	agree	agree	disagree	agree	agree
0.827644	man	42	35 to 44 years	3	1	full time	Bac + 2	married/free union	24 to 36.000 €	Service and office worker		10 to 49 people	other services	36	36	Standard duration (Less than 39h)	never	never	never	open space	5	<15 minutes	no	>4	40	agree	disagree	disagree	disagree	disagree	disagree	agree	disagree	agree	disagree	disagree	fully agree	disagree	disagree	agree	disagree	disagree	disagree	disagree	agree	agree	disagree	agree	disagree
1.11456	man	27	25 to 34 years	1	none	full time	Bac + 3	alone	24 to 36.000 €	Technician and associate professional		10 to 49 people	Education, health and social work	4	40	Long duration (39 to 50h)	never	never	Very often	open space	120	>1h30	no	2 to 4 periods	7	disagree	disagree	disagree	disagree	agree	disagree	disagree	fully agree	disagree	fully agree	agree	disagree	agree	agree	disagree	agree	fully agree	agree	fully agree	agree	agree	disagree	fully agree	agree
1.22701	woman	28	25 to 34 years	4	2	full time	< baccalaureate degree	En union libre	Over 36.000 €	Service and office worker		10 to 49 people	trading	54	37	Standard duration (Less than 39h)	Very often	never	often	open space	5	<15 minutes	no	never	15	disagree	fully disagree	agree	agree	disagree	agree	fully disagree	disagree	agree	disagree	agree	disagree	agree	disagree	disagree	disagree	fully disagree	fully agree	disagree	agree	fully agree	agree	disagree	disagree
0.346125	man	59	45 to 59 years	3	none	full time	< baccalaureate degree	married/free union	Over 36.000 €	Technician and associate professional		500 people or more	other services	302	38	Standard duration (Less than 39h)	rarely	never	rarely	open space	130	>1h30	no	never	9	disagree	disagree	agree	disagree	agree	agree	disagree	disagree	fully agree	agree	fully disagree	fully disagree	agree	agree	disagree	agree	fully disagree	fully agree	disagree	agree	agree	disagree	disagree	disagree
0.541286	woman	27	25 to 34 years	3	none	full time	Bac + 3	alone	24 to 36.000 €	Technician and associate professional		500 people or more	other services	300	40	Long duration (39 to 50h)	never	never	never	open space	45	31 to 45 minutes	no	2 to 4 periods	37	disagree	disagree	agree	agree	disagree	disagree	disagree	fully agree	disagree	fully disagree	agree	fully disagree	agree	disagree	agree	disagree	agree	disagree	disagree	disagree	agree	disagree	fully agree	agree
1.06608	woman	40	35 to 44 years	2	1	part time	Bac + 2	alone	15 to 24.000 €	Technician and associate professional		100 to 499 people	Education, health and social work	48	34	Standard duration (Less than 39h)	rarely	never	never	Individual office	10	<15 minutes	no	2 to 4 periods	14	disagree	fully agree	fully disagree	fully disagree	fully disagree	agree	fully disagree	agree	agree	fully agree	disagree	agree	agree	agree	fully disagree	disagree	fully disagree	agree	fully agree	agree	disagree	disagree	agree	fully disagree
0.995552	man	49	45 to 59 years	4	1	full time	< baccalaureate degree	married/free union		Workers		100 to 499 people	other services	252	42	Long duration (39 to 50h)	never	never	rarely	external site	360	>1h30	no	never	44	agree	agree	fully disagree	fully disagree	disagree	disagree	fully disagree	disagree	agree	agree	fully agree	fully agree	disagree	agree	agree	disagree	fully agree	disagree	fully agree	disagree	agree	fully disagree	fully agree	agree
0.897252	woman	51	45 to 59 years	1	none	full time	< baccalaureate degree	alone	15 to 24.000 €	Service and office worker		50 to 99 people	other services	360	35	Standard duration (Less than 39h)	never	never	never	Individual office	10	<15 minutes	no	never	11	fully disagree	fully disagree	agree	agree	agree	agree	fully disagree	agree	agree	disagree	disagree	fully disagree	agree	disagree	fully disagree	agree	fully disagree	fully agree	disagree	agree	agree	agree	agree	disagree
1.03237	woman	58	45 to 59 years	2	none	full time	Baccalaureate degree	alone	24 to 36.000 €	Service and office worker		10 to 49 people	Insurance and real estate	36	39	Long duration (39 to 50h)	rarely	never	often	open space	15	<15 minutes	no	never	34	disagree	fully agree	fully disagree	agree	fully disagree	fully disagree	fully disagree	agree	agree	fully disagree	agree	agree	agree	agree	disagree	disagree	agree	agree	agree	agree	disagree	fully disagree	agree	agree
0.963716	man	55	45 to 59 years	3	1	full time	< baccalaureate degree	married/free union	Over 36.000 €	Workers		100 to 499 people	Industry	60	35	Standard duration (Less than 39h)	never	never	never	Individual office	5	<15 minutes	no	never	14	agree	disagree	disagree	agree	agree	agree	disagree	disagree	agree	agree	disagree	disagree	agree	disagree	disagree	disagree	disagree	agree	disagree	agree	agree	disagree	disagree	disagree
1.15235	woman	59	45 to 59 years	2	none	full time	Bac + 3	married/free union		Technician and associate professional		500 people or more	Education, health and social work	144	45	Long duration (39 to 50h)	rarely	never	never	Individual office	90	1h to 1h30	no	never	23	disagree	agree	agree	agree	agree	agree	fully disagree	agree	agree	disagree	agree	disagree	agree	fully disagree	disagree	agree	disagree	agree	agree	agree	agree	disagree	agree	disagree
1.00506	woman	46	45 to 59 years	2	none	full time	Bac + 3	married/free union		Technician and associate professional		500 people or more	other services	204	20	Standard duration (Less than 39h)	often	never	Very often	Individual office	45	31 to 45 minutes	no	never	19	agree	disagree	agree	disagree	disagree	agree	fully disagree	fully agree	fully agree	disagree	disagree	disagree	fully agree	disagree	fully disagree	agree	disagree	agree	disagree	fully agree	agree	agree	fully agree	disagree
0.952838	man	36	35 to 44 years	3	none	self employed	< baccalaureate degree	alone	under 15.000 €		Technician and associate professional Service and office worker Workers	9 people or less	trading	36	20	Standard duration (Less than 39h)	often	never	rarely	Commercial permises	60	46 to 60 minutes	a half day per week	never	8	disagree	fully disagree		disagree		fully agree		fully disagree	agree	fully agree	disagree	disagree	fully agree	agree	fully disagree		agree	agree	disagree	agree	agree		fully disagree
1.03221	woman	36	35 to 44 years	2	1	full time	Bac + 3	alone	24 to 36.000 €	Technician and associate professional		500 people or more	Education, health and social work	171	35	Standard duration (Less than 39h)	Very often	Very often	rarely	other	25	16 to 30 minutes	no	never	21	fully disagree	agree	fully disagree	disagree	disagree	disagree	fully disagree	agree	agree	disagree	fully agree	fully agree	disagree	disagree	agree	disagree	disagree	disagree	fully agree	agree	disagree	agree	agree	agree
0.935376	man	29	25 to 34 years	3	1	full time	Bac + 3	married/free union	Over 36.000 €	Senior managers		9 people or less	trading	26	12	Standard duration (Less than 39h)	Very often	rarely	Very often	other	612	>1h30	a half day per week	>4	27	agree	agree	agree	agree	disagree	disagree	fully agree	disagree	disagree	agree	disagree	fully agree	disagree	disagree	agree	disagree	agree	disagree	disagree	disagree	disagree	disagree	fully agree	fully agree
0.670572	man	61	60 years and more	2	none	full time	Bac + 3	married/free union	Over 36.000 €	Senior managers		50 to 99 people	Education, health and social work	60	38	Standard duration (Less than 39h)	rarely	never	never	at customers	10	<15 minutes	no	never	6	fully disagree	fully agree	fully agree	agree	agree	agree	disagree	agree	agree	fully disagree	agree	fully agree	fully agree	fully disagree	fully disagree	agree	disagree	agree	fully agree	agree	agree	fully agree	agree	fully agree
1.03487	woman	40	35 to 44 years	2	none	full time	Bac + 3	married/free union	24 to 36.000 €	Senior managers		10 to 49 people	other services	96	40	Long duration (39 to 50h)	rarely	never	rarely	Individual office	2	<15 minutes	no	>4	23	disagree	agree	disagree	fully agree	agree	disagree	disagree	agree	fully agree	agree	agree	disagree	agree	disagree	disagree	agree	fully disagree	disagree	disagree	agree	agree	agree	agree	disagree
0.994262	woman	53	45 to 59 years	2	none	full time	Baccalaureate degree	alone	15 to 24.000 €	Service and office worker		50 to 99 people	Transports	360	35	Standard duration (Less than 39h)	Very often	never	Very often	external site	15	<15 minutes	no	never	14	agree	fully agree	fully disagree	fully disagree	disagree	disagree	disagree	agree	agree	agree	disagree	disagree	disagree	disagree	agree	fully disagree	fully disagree	disagree	agree	agree	agree	fully disagree	disagree	agree
1.03244	man	53	45 to 59 years	2	none	self employed	Bac + 2	married/free union	24 to 36.000 €		Craftsman, shopkeeper, entrepreneur	9 people or less	other services	18	50	Long duration (39 to 50h)	rarely	never	never	open space	30	16 to 30 minutes	no	2 to 4 periods	15	disagree	disagree		fully agree		agree		agree	agree	agree	disagree	fully disagree	agree	fully disagree	fully disagree		disagree	disagree	disagree	agree	agree		agree
1.15184	man	32	25 to 34 years	4	2	full time	< baccalaureate degree	married/free union	15 to 24.000 €	Workers		100 to 499 people	other services	8	45	Long duration (39 to 50h)	rarely	often	Very often	flex office	20	16 to 30 minutes	no	2 to 4 periods	46	agree	agree	fully disagree	fully disagree	fully disagree	fully disagree	disagree	agree	disagree	fully agree	fully agree	agree	fully disagree	disagree	fully disagree	disagree	fully disagree	fully disagree	agree	disagree	fully disagree	disagree	agree	fully disagree
0.449938	woman	53	45 to 59 years	1	none	full time	Baccalaureate degree	alone	24 to 36.000 €	Technician and associate professional		500 people or more	Education, health and social work	360	35	Standard duration (Less than 39h)	often	never	never	production or workshop	40	31 to 45 minutes	no	1 period	19	fully agree	fully agree	disagree	fully disagree	disagree	agree	disagree	agree	fully agree	fully agree	disagree	fully disagree	disagree	disagree	disagree	disagree	fully disagree	agree	fully agree	disagree	agree	agree	agree	agree
1.22147	woman	57	45 to 59 years	2	none	part time	Bac + 2	married/free union	24 to 36.000 €	Workers		50 to 99 people	other services	120	35	Standard duration (Less than 39h)	Very often	often	often	production or workshop	5	<15 minutes	no	2 to 4 periods	18	disagree	fully disagree	agree	disagree	fully agree	agree	fully agree	fully disagree	fully agree	agree	fully disagree	fully disagree	fully agree	disagree	fully disagree	agree	fully disagree	fully agree	fully disagree	agree	fully agree	disagree	fully disagree	fully disagree
0.92951	man	51	45 to 59 years	3	none	full time	Bac + 2	married/free union	Over 36.000 €	Senior managers		10 to 49 people	trading	120	46	Long duration (39 to 50h)	rarely	never	never	flex office	240	>1h30	no	never	17	fully disagree	disagree	fully disagree	fully disagree	disagree	agree	agree	agree	agree	fully agree	agree	disagree	agree	disagree	disagree	disagree	disagree	agree	agree	agree	agree	disagree	agree	agree
0.781216	man	51	45 to 59 years	2	none	full time	Bac + 2	married/free union	Over 36.000 €	Technician and associate professional		500 people or more	Education, health and social work	360	40	Long duration (39 to 50h)	often	often	often	open space	5	<15 minutes	no	never	35	disagree	agree	disagree	disagree	fully disagree	agree	disagree	agree	agree	agree	agree	disagree	agree	fully agree	disagree	disagree	fully disagree	disagree	disagree	fully disagree	disagree	agree	agree	disagree
1.25552	woman	62	60 years and more	1	none	part time	Baccalaureate degree	alone	under 15.000 €	Workers		10 to 49 people	Transports	36	25	Standard duration (Less than 39h)	never	never	often	other	360	>1h30	no	1 period	3	disagree	agree	agree	disagree	agree	fully agree	fully disagree	disagree	fully agree	agree	fully disagree	disagree	fully agree	fully disagree	agree	fully agree	fully agree	agree	agree	fully agree	fully agree	agree	disagree	fully disagree
0.416987	woman	44	35 to 44 years	3	1	full time	Bac + 3	married/free union		Technician and associate professional		500 people or more	Education, health and social work	253	42	Long duration (39 to 50h)	often	never	Very often	other	10	<15 minutes	no	1 period	10	fully disagree	agree	disagree	disagree	disagree	disagree	disagree	fully agree	agree	agree	agree	fully disagree	disagree	fully disagree	agree	disagree	disagree	agree	fully agree	agree	disagree	disagree	agree	disagree
0.799727	man	42	35 to 44 years	2	none	full time	Bac + 3	married/free union	24 to 36.000 €	Senior managers		500 people or more	other services	6	35	Standard duration (Less than 39h)	never	never	never	Individual office	120	>1h30	no	1 period	15	disagree	agree	fully agree	agree	agree	agree	fully disagree	agree	fully agree	fully agree	agree	disagree	agree	disagree	disagree	agree	agree	agree	agree	disagree	agree	fully agree	agree	disagree
2.1046	man	25	25 to 34 years	5 and more	none	full time	Bac + 2	alone	24 to 36.000 €	Workers		9 people or less	Industry	38	35	Standard duration (Less than 39h)	rarely	often	often	open space	35	31 to 45 minutes	1 day per week	2 to 4 periods	42	agree	agree	agree	fully agree	agree	agree	agree	disagree	agree	agree	fully agree	agree	fully agree	disagree	agree	fully agree	fully agree	disagree	fully agree	agree	agree	agree	agree	disagree
0.629957	woman	55	45 to 59 years	3	none	self employed	Bac + 2	En union libre			Craftsman, shopkeeper, entrepreneur		trading	120	60	Very Long duration (More than50h)	Very often	never	often	at home	90	1h to 1h30		never	11	disagree	fully disagree		fully agree		fully agree		disagree	fully agree	disagree	disagree	fully disagree	agree	fully disagree	fully disagree		disagree	agree	disagree	agree	agree		disagree
1.02335	man	44	35 to 44 years	3	1	self employed	Bac + 2	En union libre	24 to 36.000 €		Craftsman, shopkeeper, entrepreneur		building	63	44	Long duration (39 to 50h)	often	never	rarely	at customers	30	16 to 30 minutes	no	2 to 4 periods	28	disagree	agree		fully agree		agree		fully agree	agree	fully agree	agree	agree	agree	agree	fully disagree		disagree	disagree	agree	fully agree	agree		disagree
0.380519	woman	56	45 to 59 years	2	1	full time	< baccalaureate degree	alone	24 to 36.000 €	Technician and associate professional		500 people or more	Insurance and real estate	468	39	Long duration (39 to 50h)	Very often	never	never	Individual office	10	<15 minutes	no	never	8	disagree	fully agree	agree	agree	agree	disagree	fully disagree	agree	agree	disagree	fully agree	disagree	agree	disagree	disagree	agree	fully disagree	agree	fully agree	fully agree	agree	agree	agree	disagree
1.10341	man	51	45 to 59 years	3	none	full time	Bac + 2	En union libre	15 to 24.000 €	Service and office worker		9 people or less	trading	288	45	Long duration (39 to 50h)	rarely	never	often	Commercial permises	180	>1h30	no	1 period	10	disagree	disagree	agree	agree	agree	disagree	disagree	agree	agree	agree	disagree	disagree	agree	agree	fully disagree	agree	disagree	agree	disagree	agree	disagree	agree	agree	agree
1.30276	man	33	25 to 34 years	4	2	full time	< baccalaureate degree	En union libre		Workers		10 to 49 people	other services	32	37	Standard duration (Less than 39h)	never	never	never	at customers	45	31 to 45 minutes	no	2 to 4 periods	26	disagree	disagree	fully disagree	agree	disagree	disagree	disagree	agree	agree	agree	fully disagree	disagree	agree	fully disagree	agree	agree	fully agree	agree	fully agree	agree	disagree	fully disagree	agree	disagree
0.802195	man	44	35 to 44 years	4	2	full time	Baccalaureate degree	married/free union	Over 36.000 €	Technician and associate professional		100 to 499 people	other services	52	39	Long duration (39 to 50h)	never	never	rarely	open space	52	46 to 60 minutes	no	never	11	fully disagree	disagree	disagree	agree	agree	agree	fully agree	agree	fully agree	agree	disagree	disagree	fully agree	fully disagree	disagree	agree	fully disagree	agree	disagree	fully agree	fully agree	agree	disagree	fully disagree
1.05754	man	54	45 to 59 years	4	1	full time	< baccalaureate degree	married/free union	24 to 36.000 €	Workers		10 to 49 people	Transports	202	45	Long duration (39 to 50h)	often	Very often	Very often	other	120	>1h30	no	2 to 4 periods	15	fully disagree	fully agree	agree	disagree	agree	agree	fully disagree	agree	fully agree	fully agree	agree	fully agree	fully agree	fully agree	fully disagree	disagree	agree	agree	agree	fully agree	agree	fully disagree	fully agree	fully disagree
1.15554	man	55	45 to 59 years	5 and more	2	full time	< baccalaureate degree	married/free union	24 to 36.000 €	Technician and associate professional		9 people or less	other services	182	39	Long duration (39 to 50h)	rarely	never	rarely	external site	10	<15 minutes	no	1 period	15	fully disagree	disagree	fully disagree	disagree	agree	agree	agree	agree	fully agree	disagree	fully agree	disagree	disagree	disagree	disagree	fully disagree	fully disagree	disagree	agree	agree	agree	fully disagree	agree	fully agree
0.780776	man	59	45 to 59 years	2	none	full time	Baccalaureate degree	married/free union	24 to 36.000 €	Senior managers		10 to 49 people	Education, health and social work	123	37	Standard duration (Less than 39h)	never	never	rarely	open space	75	1h to 1h30	no	never	9	disagree	disagree	agree	disagree	agree	agree	disagree	disagree	agree	disagree	disagree	disagree	agree	disagree	fully disagree	agree	agree	agree	disagree	agree	agree	agree	disagree	disagree
0.972964	woman	52	45 to 59 years	2	none	part time	Bac + 2	alone	15 to 24.000 €	Technician and associate professional		50 to 99 people	Education, health and social work	120	18	Standard duration (Less than 39h)	never	never	never	Individual office	60	46 to 60 minutes	no	1 period	7	disagree	agree	disagree	disagree	agree	agree	fully disagree	disagree	agree	agree	agree	fully disagree	agree	disagree	disagree	disagree	disagree	disagree	disagree	disagree	agree	agree	disagree	disagree
0.417581	man	28	25 to 34 years	1	none	full time	Baccalaureate degree	alone		Technician and associate professional		500 people or more	Transports	2	39	Long duration (39 to 50h)	often	Very often	rarely	external site	30	16 to 30 minutes	no	never	9	disagree	fully agree	agree	disagree	agree	agree	disagree	agree	agree	disagree	disagree	disagree	agree	disagree	disagree	agree	fully disagree	agree	agree	agree	agree	agree	agree	agree
1.32116	man	30	25 to 34 years	2	none	full time	Baccalaureate degree	alone	24 to 36.000 €	Service and office worker		9 people or less	trading	62	60	Very Long duration (More than50h)	rarely	rarely	often	other	300	>1h30	1 day per week	never	70	agree	disagree	disagree	disagree	agree	disagree	agree	agree	agree	disagree	disagree	agree	agree	disagree	agree	agree	disagree	disagree	agree	agree	agree	disagree	agree	agree
0.756295	woman	47	45 to 59 years	4	2	self employed	Baccalaureate degree	married/free union	24 to 36.000 €		Senior managers	9 people or less	Education, health and social work	120	40	Long duration (39 to 50h)	never	never	never	at home	0	<15 minutes		never	11	fully disagree	fully disagree		agree		fully agree		fully disagree	fully agree	agree	fully disagree	agree	agree	fully disagree	agree		fully disagree	agree	agree	fully agree	fully disagree		fully disagree
1.07639	woman	48	45 to 59 years	3	none	full time	Baccalaureate degree	alone	under 15.000 €	Service and office worker		100 to 499 people	other services	125	35	Standard duration (Less than 39h)	never	never	never	other	20	16 to 30 minutes	no	never	10	agree	agree	fully agree	agree	fully agree	agree	fully agree	fully disagree	fully agree	fully disagree	fully disagree	fully disagree	fully agree	disagree	fully disagree	agree	fully disagree	fully agree	disagree	fully agree	agree	disagree	fully disagree	fully agree
0.582846	woman	31	25 to 34 years	3	1	self employed	Baccalaureate degree	married/free union	15 to 24.000 €		Technician and associate professional Service and office worker Workers	9 people or less	other services	86	14	Standard duration (Less than 39h)	rarely	never	never	other	30	16 to 30 minutes	no	1 period	36	fully disagree	disagree		fully disagree		agree		fully disagree	agree	fully agree	fully agree	agree	agree	fully disagree	fully disagree		fully disagree	agree	fully disagree	agree	disagree		fully disagree
1.57129	woman	35	35 to 44 years	4	2	full time	Bac + 2	married/free union	Over 36.000 €	Technician and associate professional		9 people or less	Education, health and social work	120	39	Long duration (39 to 50h)	never	never	never	open space	30	16 to 30 minutes	no	never	21	fully disagree	fully agree	fully agree	fully agree	fully agree	fully agree	fully disagree	disagree	fully agree	fully disagree	fully disagree	fully disagree	fully agree	fully disagree	fully disagree	fully agree	disagree	fully agree	fully agree	fully agree	fully agree	fully agree	disagree	fully disagree
1.0289	woman	56	45 to 59 years	2	none	part time	Bac + 2	En union libre		Service and office worker		10 to 49 people	other services	137	32	Standard duration (Less than 39h)	never	never	never	at customers	75	1h to 1h30	no	2 to 4 periods	13	agree	disagree	agree	fully agree	fully agree	agree	fully disagree	fully disagree	agree	agree	disagree	fully disagree	agree	fully disagree	fully disagree	agree	disagree	agree	disagree	fully agree	fully agree	disagree	disagree	disagree
0.289142	man	45	45 to 59 years	3	none	full time	Bac + 3	married/free union	Over 36.000 €	Senior managers		500 people or more	Industry	24	45	Long duration (39 to 50h)	often	never	never	Individual office	90	1h to 1h30	1 day per week	never	10	fully disagree	agree	disagree	agree	agree	agree	fully disagree	agree	agree	disagree	agree	disagree	agree	disagree	fully disagree	agree	agree	agree	agree	agree	agree	agree	agree	fully disagree
1.32116	man	32	25 to 34 years	2	none	full time	Bac + 2	alone	under 15.000 €	Service and office worker		9 people or less	Education, health and social work	25	32	Standard duration (Less than 39h)	Very often	rarely	often	Commercial permises	172	>1h30	a half day per week	never	16	fully agree	disagree	agree	fully agree	agree	fully agree	agree	fully agree	fully agree	disagree	agree	disagree	disagree	fully agree	fully agree	agree	fully agree	fully agree	agree	fully agree	agree	disagree	agree	agree
0.897866	man	44	35 to 44 years	4	2	full time	< baccalaureate degree	married/free union	Over 36.000 €	Senior managers		100 to 499 people	other services	180	45	Long duration (39 to 50h)	often	often	Very often	other	35	31 to 45 minutes	no	never	21	disagree	agree	disagree	agree	disagree	agree	disagree	agree	disagree	disagree	agree	disagree	agree	agree	agree	agree	disagree	disagree	agree	agree	agree	agree	agree	disagree
1.18717	woman	30	25 to 34 years	2	none	full time	Bac + 3	married/free union	24 to 36.000 €	Service and office worker		500 people or more	Education, health and social work	36	40	Long duration (39 to 50h)	often	often	Very often	other	5	<15 minutes	no	1 period	23	agree	fully agree	disagree	agree	disagree	agree	fully disagree	fully agree	agree	agree	disagree	agree	disagree	fully disagree	disagree	fully agree	fully disagree	agree	fully agree	fully agree	disagree	agree	fully agree	disagree
0.696898	man	49	45 to 59 years	3	none	full time	Bac + 2	En union libre	Over 36.000 €	Service and office worker		50 to 99 people	trading	14	50	Long duration (39 to 50h)	rarely	never	never	at customers	300	>1h30	no	1 period	11	disagree	agree	fully disagree	disagree	fully disagree	agree	fully disagree	disagree	disagree	fully agree	agree	fully disagree	fully disagree	disagree	agree	disagree	fully disagree	agree	disagree	fully disagree	disagree	fully agree	disagree	fully agree
1.03221	woman	42	35 to 44 years	4	2	part time	Bac + 3	married/free union	24 to 36.000 €	Technician and associate professional		500 people or more	Education, health and social work	180	28	Standard duration (Less than 39h)	never	never	never	Individual office	10	<15 minutes	no	1 period	46	disagree	fully agree	fully disagree	fully disagree	disagree	agree	agree	fully agree	disagree	agree	fully agree	agree	fully disagree	agree	agree	fully disagree	agree	disagree	agree	disagree	fully disagree	fully disagree	fully agree	fully agree
0.938497	man	33	25 to 34 years	2	none	full time	Bac + 3	married/free union	Over 36.000 €	Senior managers		10 to 49 people	Education, health and social work	72	40	Long duration (39 to 50h)	rarely	rarely	rarely	Individual office	40	31 to 45 minutes	no	1 period	8	fully disagree	disagree	fully disagree	disagree	disagree	agree	disagree	agree	agree	disagree	fully agree	fully disagree	agree	agree	disagree	disagree	disagree	agree	disagree	agree	agree	agree	agree	fully agree
0.948312	woman	61	60 years and more	1	none	part time	< baccalaureate degree	alone	under 15.000 €	Service and office worker		10 to 49 people	other services	180	25	Standard duration (Less than 39h)	never	never	rarely	Individual office	30	16 to 30 minutes	no	>4	0	disagree	agree	agree	agree	agree	agree	agree	disagree	agree	agree	disagree	disagree	agree	disagree	disagree	agree	disagree	agree	agree	agree	agree	agree	disagree	disagree
0.848473	man	56	45 to 59 years	4	1	full time	Bac + 2	alone	Over 36.000 €	Technician and associate professional		100 to 499 people	building	122	50	Long duration (39 to 50h)	rarely	never	rarely	open space	45	31 to 45 minutes	no	never	12	disagree	disagree	agree	agree	agree	agree	disagree	disagree	agree	disagree	disagree	fully disagree	agree	disagree	fully disagree	agree	disagree	agree	agree	agree	agree	agree	disagree	disagree
1.78994	man	31	25 to 34 years	3	none	full time	Baccalaureate degree	alone	15 to 24.000 €	Workers		9 people or less	building	87	50	Long duration (39 to 50h)	often	rarely	rarely	at customers	301	>1h30	no	2 to 4 periods	34	disagree	disagree	agree	agree	agree	disagree	disagree	agree	fully disagree	disagree	agree	agree	agree	agree	agree	disagree	fully disagree	disagree	agree	agree	disagree	agree	agree	disagree
1.4169	woman	56	45 to 59 years	3	none	part time	< baccalaureate degree	married/free union		Service and office worker		9 people or less	Education, health and social work	180	28	Standard duration (Less than 39h)	rarely	never	never	Individual office	15	<15 minutes	no	1 period	3	disagree	disagree	agree	agree	agree	agree	agree	agree	agree	agree	agree	agree	agree	agree	disagree	agree	disagree	agree	agree	agree	agree	agree	agree	disagree
1.22701	woman	30	25 to 34 years	2	none	full time	Bac + 2	En union libre	24 to 36.000 €	Service and office worker		10 to 49 people	other services	59	38	Standard duration (Less than 39h)	never	never	never	open space	20	16 to 30 minutes	no	1 period	19	disagree	agree	agree	disagree	agree	disagree	disagree	agree	fully agree	agree	disagree	fully agree	agree	disagree	disagree	fully agree	disagree	agree	agree	agree	agree	disagree	agree	disagree
0.757771	man	57	45 to 59 years	3	none	full time	Bac + 2	married/free union	Over 36.000 €	Senior managers		10 to 49 people	Transports	246	45	Long duration (39 to 50h)	rarely	never	rarely	Individual office	90	1h to 1h30	no	never	12	disagree	disagree	agree	agree	agree	agree	fully disagree	agree	fully agree	agree	fully disagree	disagree	agree	disagree	disagree	agree	disagree	agree	agree	agree	agree	agree	fully agree	fully disagree
0.717265	man	46	45 to 59 years	1	none	full time	Bac + 3	alone	24 to 36.000 €	Senior managers		100 to 499 people	other services	96	40	Long duration (39 to 50h)	rarely	never	rarely	Individual office	15	<15 minutes	no	never	22	agree	agree	disagree	agree	agree	agree	fully disagree	agree	agree	agree	fully agree	agree	agree	disagree	disagree	agree	fully disagree	agree	agree	agree	fully agree	disagree	fully agree	disagree
0.923648	woman	55	45 to 59 years	3	1	full time	Bac + 2	married/free union	Over 36.000 €	Senior managers		100 to 499 people	trading	12	39	Long duration (39 to 50h)	never	never	never	open space	25	16 to 30 minutes	no	never	23	disagree	disagree	disagree	disagree	disagree	agree	disagree	agree	agree	disagree	agree	disagree	agree	agree	disagree	agree	fully disagree	agree	agree	agree	agree	disagree	agree	disagree
4	man	23	18 to 24 years	1	none	full time	Baccalaureate degree	alone	under 15.000 €	Workers		10 to 49 people	other services	84	35	Standard duration (Less than 39h)	Very often	never	never	other	55	46 to 60 minutes	no	2 to 4 periods	13	disagree	fully disagree	fully disagree	fully disagree	fully disagree	fully disagree	fully disagree	fully disagree	fully agree	fully agree	disagree	disagree	disagree	fully disagree	agree	fully disagree	fully disagree	fully disagree	fully agree	disagree	disagree	fully agree	agree	disagree
1.26086	woman	55	45 to 59 years	3	1	full time	< baccalaureate degree	married/free union	24 to 36.000 €	Workers		50 to 99 people	Industry	441	35	Standard duration (Less than 39h)	never	never	never	production or workshop	10	<15 minutes	no	never	20	agree	disagree	fully disagree	fully disagree	disagree	agree	fully disagree	disagree	agree	agree	agree	disagree	agree	disagree	disagree	agree	fully disagree	agree	agree	agree	agree	agree	disagree	disagree
0.739479	man	48	45 to 59 years	3	none	full time	Baccalaureate degree	married/free union	Over 36.000 €	Technician and associate professional		100 to 499 people	Industry	331	40	Long duration (39 to 50h)	rarely	rarely	rarely	production or workshop	5	<15 minutes	no	never	7	disagree	fully disagree	agree	agree	disagree	disagree	fully disagree	disagree	agree	disagree	agree	fully disagree	disagree	disagree	disagree	disagree	fully disagree	agree	agree	agree	disagree	disagree	disagree	agree
1.05456	woman	41	35 to 44 years	2	1	part time	Bac + 2	alone	under 15.000 €	Service and office worker		50 to 99 people	Education, health and social work	6	28	Standard duration (Less than 39h)	never	never	never	flex office	45	31 to 45 minutes	no	1 period	6	disagree	disagree	agree	agree	agree	agree	fully disagree	fully disagree	fully agree	agree	disagree	agree	agree	fully disagree	disagree	agree	agree	agree	disagree	fully agree	agree	fully agree	agree	fully disagree
0.627907	woman	33	25 to 34 years	1	none	self employed	Bac + 2	alone	15 to 24.000 €		Craftsman, shopkeeper, entrepreneur		other services	49	30	Standard duration (Less than 39h)	Very often	never	never	other	120	>1h30	no	2 to 4 periods	13	fully disagree	fully disagree		fully agree		fully agree		fully disagree	fully agree	agree	disagree	fully disagree	agree	fully agree	fully disagree		agree	fully agree	agree	fully agree	fully agree		disagree
0.368226	man	37	35 to 44 years	4	2	full time	Bac + 2	married/free union	Over 36.000 €	Technician and associate professional		500 people or more	Transports	6	40	Long duration (39 to 50h)	never	never	never	Individual office	180	>1h30	no	1 period	14	agree	agree	agree	fully disagree	agree	agree	agree	disagree	agree	fully agree	disagree	disagree	disagree	agree	agree	agree	agree	disagree	agree	disagree	agree	agree	agree	disagree
1.06959	man	34	25 to 34 years	3	1	full time	Bac + 3	married/free union	Over 36.000 €	Senior managers		100 to 499 people	other services	18	40	Long duration (39 to 50h)	rarely	never	rarely	open space	55	46 to 60 minutes	no	1 period	21	disagree	disagree	agree	agree	agree	agree	fully disagree	agree	agree	disagree	agree	fully disagree	agree	disagree	disagree	agree	disagree	agree	disagree	agree	agree	agree	agree	disagree
0.745917	man	57	45 to 59 years	2	none	full time	< baccalaureate degree	married/free union	24 to 36.000 €	Service and office worker		100 to 499 people	other services	216	41	Long duration (39 to 50h)	never	never	never	external site	220	>1h30	no	never	52	disagree	disagree	fully agree	fully disagree	fully disagree	fully agree	agree	agree	agree	agree	fully agree	fully agree	disagree	fully agree	disagree	disagree	fully disagree	fully disagree	fully disagree	disagree	fully agree	agree	disagree	fully agree
0.932187	man	55	45 to 59 years	1	none	full time	Bac + 3	alone	24 to 36.000 €	Technician and associate professional		10 to 49 people	trading	360	35	Standard duration (Less than 39h)	Very often	rarely	never	Commercial permises	40	31 to 45 minutes	no	never	13	agree	agree	disagree	disagree	disagree	disagree	disagree	agree	fully agree	agree	agree	agree	agree	disagree	agree	disagree	fully disagree	disagree	disagree	agree	disagree	disagree	agree	agree
0.391352	woman	55	45 to 59 years	2	none	part time	Bac + 2	married/free union		Technician and associate professional		500 people or more	Education, health and social work	24	40	Long duration (39 to 50h)	often	often	often	flex office	180	>1h30	more than one day a week	1 period	17	fully disagree	disagree	disagree	agree	agree	agree	disagree	disagree	fully agree	disagree	disagree	disagree	agree	disagree	disagree	agree	agree	agree	disagree	agree	agree	agree	disagree	disagree
0.785011	man	40	35 to 44 years	1	none	full time	Bac + 3	alone	15 to 24.000 €	Technician and associate professional		100 to 499 people	other services	26	35	Standard duration (Less than 39h)	never	never	never	at customers	10	<15 minutes	no	2 to 4 periods	2	disagree	fully disagree	agree	disagree	disagree	agree	fully disagree	fully disagree	fully agree	fully disagree	fully disagree	fully disagree	disagree	fully disagree	fully disagree	agree	fully disagree	agree	fully disagree	fully disagree	fully agree	agree	fully disagree	fully disagree
1.2765	woman	45	45 to 59 years	2	1	full time	< baccalaureate degree	alone	15 to 24.000 €	Workers		100 to 499 people	Industry	289	36	Standard duration (Less than 39h)	never	never	never	production or workshop	10	<15 minutes	no	2 to 4 periods	17	agree	agree	fully disagree	fully disagree	fully disagree	disagree	fully disagree	disagree	agree	fully agree	agree	agree	disagree	agree	fully agree	fully disagree	fully disagree	disagree	agree	agree	disagree	fully disagree	disagree	agree
0.826787	man	52	45 to 59 years	3	1	full time	Bac + 3	married/free union	Over 36.000 €	Service and office worker		50 to 99 people	Insurance and real estate	240	40	Long duration (39 to 50h)	never	never	never	open space	40	31 to 45 minutes	no	never	25	disagree	agree	disagree	disagree	disagree	agree	disagree	fully agree	disagree	agree	fully agree	disagree	disagree	disagree	disagree	agree	fully disagree	agree	disagree	disagree	agree	disagree	agree	disagree
0.8206	man	38	35 to 44 years	5 and more	3	full time	Bac + 2	En union libre	Over 36.000 €	Service and office worker		100 to 499 people	other services	84	45	Long duration (39 to 50h)	Very often	Very often	Very often	external site	360	>1h30	no	never	17	agree	fully agree	disagree	disagree	disagree	disagree	disagree	disagree	agree	agree	disagree	agree	agree	disagree	disagree	disagree	fully agree	agree	fully agree	agree	disagree	agree	disagree	disagree
1.1492	woman	56	45 to 59 years	3	2	full time	Bac + 3	alone	24 to 36.000 €	Senior managers		500 people or more	Education, health and social work	468	55	Very Long duration (More than50h)	Very often	often	Very often	other	15	<15 minutes	a half day per week	never	12	fully disagree	disagree	fully agree	fully agree	fully agree	agree	fully disagree	disagree	agree	fully disagree	fully agree	disagree	fully agree	fully disagree	fully disagree	fully agree	fully disagree	fully agree	fully agree	fully agree	disagree	fully agree	agree	agree
1.4556	man	51	45 to 59 years	1	none	self employed	Bac + 2	alone	15 to 24.000 €		Technician and associate professional Service and office worker Workers	9 people or less	Industry	61	35	Standard duration (Less than 39h)	never	never	never	Individual office	15	<15 minutes	no	never	14	disagree	disagree		agree		disagree		agree	agree	fully agree	fully agree	disagree	disagree	fully agree	disagree		fully disagree	agree	agree	disagree	disagree		agree
1.19689	woman	53	45 to 59 years	3	none	full time	Bac + 3	married/free union		Technician and associate professional		10 to 49 people	Education, health and social work	78	35	Standard duration (Less than 39h)	never	never	never	flex office	30	16 to 30 minutes	no	1 period	40	fully agree	disagree	fully disagree	disagree	fully disagree	fully disagree	agree	disagree	agree	disagree	fully disagree	agree	fully disagree	agree	fully agree	fully disagree	fully disagree	fully disagree	agree	fully disagree	disagree	disagree	fully disagree	fully disagree
1.0629	man	55	45 to 59 years	1	none	full time	Baccalaureate degree	alone	15 to 24.000 €	Workers		10 to 49 people	Industry	420	35	Standard duration (Less than 39h)	never	rarely	Very often	production or workshop	50	46 to 60 minutes	no	1 period	18	agree	agree	fully disagree	fully disagree	fully disagree	fully disagree	agree	disagree	disagree	agree	disagree	disagree	fully disagree	disagree	fully agree	disagree	disagree	disagree	disagree	disagree	agree	fully disagree	disagree	disagree
0.30894	man	36	35 to 44 years	1	none	full time	Bac + 2	alone	15 to 24.000 €	Technician and associate professional		500 people or more	other services	9	38	Standard duration (Less than 39h)	often	often	never	open space	20	16 to 30 minutes	1 day per week	2 to 4 periods	6	fully disagree	fully agree	fully disagree	disagree	fully disagree	disagree	disagree	fully agree	disagree	fully agree	agree	agree	disagree	fully agree	disagree	agree	disagree	agree	fully agree	agree	fully disagree	fully agree	agree	fully agree
1.03237	woman	51	45 to 59 years	2	none	full time	< baccalaureate degree	alone	under 15.000 €	Service and office worker		10 to 49 people	trading	72	35	Standard duration (Less than 39h)	Very often	never	Very often	Commercial permises	10	<15 minutes	no	2 to 4 periods	31	disagree	agree	fully disagree	fully disagree	disagree	disagree	disagree	agree	disagree	fully disagree	fully agree	fully agree	disagree	agree	fully agree	agree	fully disagree	fully disagree	fully disagree	agree	agree	fully agree	agree	fully agree
1.04717	woman	57	45 to 59 years	1	none	full time	Bac + 2	alone	24 to 36.000 €	Technician and associate professional		10 to 49 people	Industry	113	35	Standard duration (Less than 39h)	rarely	never	never	open space	15	<15 minutes	no	2 to 4 periods	11	agree	disagree	disagree	disagree	disagree	agree	fully disagree	disagree	agree	fully agree	fully disagree	disagree	disagree	disagree	agree	fully disagree	fully disagree	disagree	disagree	agree	disagree	fully disagree	agree	disagree
0.579486	woman	39	35 to 44 years	3	1	self employed	Bac + 3	married/free union			Technician and associate professional Service and office worker Workers	9 people or less	other services	33	45	Long duration (39 to 50h)	never	never	often	at home	0	<15 minutes		2 to 4 periods	19	fully disagree	fully agree		fully disagree		agree		agree	disagree	disagree	disagree	disagree	agree	agree	fully disagree		fully disagree	fully disagree	fully agree	agree	disagree		fully agree
0.941037	man	32	25 to 34 years	3	1	full time	Bac + 3	married/free union	Over 36.000 €	Technician and associate professional		10 to 49 people	trading	54	40	Long duration (39 to 50h)	often	rarely	often	external site	60	46 to 60 minutes	no	never	5	agree	disagree	agree	disagree	agree	agree	disagree	agree	agree	agree	agree	fully agree	fully agree	agree	disagree	agree	disagree	agree	fully agree	agree	disagree	agree	agree	disagree
0.729785	man	45	45 to 59 years	5 and more	none	full time	Baccalaureate degree	married/free union	15 to 24.000 €	Service and office worker		100 to 499 people	Education, health and social work	72	35	Standard duration (Less than 39h)	rarely	never	never	production or workshop	10	<15 minutes	no	1 period	12	fully disagree	disagree	fully agree	fully agree	agree	fully agree	fully disagree	disagree	fully agree	fully disagree	fully disagree	disagree	fully agree	agree	disagree	fully disagree	fully disagree	fully agree	disagree	fully agree	fully agree	fully agree	agree	fully disagree
0.476634	woman	37	35 to 44 years	2	none	full time	Bac + 3	En union libre	24 to 36.000 €	Senior managers		500 people or more	Insurance and real estate	6	35	Standard duration (Less than 39h)	never	never	rarely	Individual office	40	31 to 45 minutes	no	1 period	18	disagree	disagree	disagree	fully agree	agree	agree	disagree	fully agree	agree	agree	fully agree	fully disagree	agree	agree	fully disagree	fully agree	disagree	disagree	disagree	fully agree	agree	disagree	fully agree	disagree
1.39778	woman	52	45 to 59 years	1	none	full time	Baccalaureate degree	En union libre	24 to 36.000 €	Workers		10 to 49 people	Education, health and social work	96	35	Standard duration (Less than 39h)	never	never	never	other	10	<15 minutes	no	1 period	10	disagree	agree	agree	agree	agree	disagree	agree	agree	agree	fully agree	disagree	agree	disagree	agree	agree	agree	agree	agree	agree	agree	agree	agree	agree	agree
0.837505	man	51	45 to 59 years	3	1	full time	< baccalaureate degree	married/free union		Service and office worker		100 to 499 people	Transports	18	42	Long duration (39 to 50h)	Very often	never	Very often	external site	300	>1h30	no	1 period	8	disagree	agree	agree	disagree	agree	agree	fully disagree	disagree	agree	disagree	disagree	disagree	agree	disagree	disagree	agree	fully disagree	agree	disagree	agree	agree	agree	agree	disagree
0.787076	man	42	35 to 44 years	4	1	full time	Bac + 3	married/free union		Technician and associate professional		100 to 499 people	Industry	240	35	Standard duration (Less than 39h)	never	never	never	production or workshop	20	16 to 30 minutes	no	1 period	21	disagree	agree	disagree	disagree	agree	agree	disagree	disagree	fully agree	agree	agree	disagree	agree	disagree	disagree	disagree	fully disagree	agree	agree	agree	agree	fully agree	agree	agree
0.706009	man	54	45 to 59 years	1	none	full time	< baccalaureate degree	alone	15 to 24.000 €	Service and office worker		100 to 499 people	trading	242	37	Standard duration (Less than 39h)	Very often	never	Very often	Commercial permises	10	<15 minutes	no	1 period	8	agree	disagree	agree	agree	agree	agree	disagree	disagree	fully agree	fully disagree	fully disagree	agree	agree	agree	fully disagree	agree	fully disagree	fully agree	fully disagree	agree	agree	agree	disagree	disagree
2.93013	man	53	45 to 59 years	4	none	self employed	< baccalaureate degree	married/free union	24 to 36.000 €		Farmers		other services	372	80	Very Long duration (More than50h)	Very often	rarely	Very often	external site	5	<15 minutes	no	never	3	disagree	agree		agree		agree		agree	disagree	agree	fully agree	disagree	agree	agree	disagree		disagree	agree	agree	agree	agree		disagree
1.09198	man	55	45 to 59 years	4	1	full time	< baccalaureate degree	married/free union	15 to 24.000 €	Workers		10 to 49 people	building	240	30	Standard duration (Less than 39h)	rarely	never	rarely	other	30	16 to 30 minutes	no	2 to 4 periods	32	fully disagree	fully disagree	fully agree	agree	fully agree	fully agree	fully disagree	fully disagree	fully agree	fully disagree	fully disagree	fully disagree	fully agree	fully disagree	fully disagree	agree	fully disagree	fully agree	fully disagree	fully agree	fully agree	fully agree	disagree	fully disagree
1.4169	woman	49	45 to 59 years	2	none	full time	< baccalaureate degree	alone	15 to 24.000 €	Service and office worker		9 people or less	Education, health and social work	372	35	Standard duration (Less than 39h)	Very often	never	never	Commercial permises	5	<15 minutes	no	never	19	agree	fully agree	disagree	agree	agree	agree	agree	agree	agree	agree	agree	fully agree	agree	disagree	agree	agree	disagree	disagree	fully agree	agree	agree	agree	agree	disagree
1.54143	woman	39	35 to 44 years	2	none	full time	Baccalaureate degree	married/free union		Service and office worker		9 people or less	other services	6	35	Standard duration (Less than 39h)	Very often	never	never	Commercial permises	5	<15 minutes	no	>4	20	disagree	agree	agree	disagree	agree	agree	fully disagree	disagree	disagree	fully agree	disagree	disagree	agree	agree	disagree	agree	fully disagree	agree	agree	agree	agree	disagree	disagree	disagree
0.478284	woman	44	35 to 44 years	1	none	self employed	Bac + 3	alone	24 to 36.000 €		Technician and associate professional Service and office worker Workers		Education, health and social work	110	45	Long duration (39 to 50h)	often	rarely	often	at customers	20	16 to 30 minutes	no	never	12	disagree	agree		agree		disagree		disagree	disagree	disagree	agree	disagree	agree	disagree	fully disagree		disagree	agree	agree	agree	agree		disagree
1.00955	man	40	35 to 44 years	2	none	full time	< baccalaureate degree	alone	under 15.000 €	Workers		50 to 99 people	trading	204	39	Long duration (39 to 50h)	Very often	Very often	Very often	Commercial permises	30	16 to 30 minutes	no	never	11	fully agree	fully agree	fully agree	agree	agree	agree	disagree	fully agree	agree	agree	fully agree	fully agree	disagree	fully disagree	disagree	agree	fully disagree	agree	fully agree	agree	agree	agree	fully agree	agree
0.896179	man	48	45 to 59 years	4	1	part time	Bac + 3	married/free union		Technician and associate professional		500 people or more	Education, health and social work	216	37	Standard duration (Less than 39h)	never	never	never	other	60	46 to 60 minutes	no	1 period	32	disagree	fully agree	disagree	disagree	disagree	agree	fully disagree	agree	agree	agree	agree	fully agree	disagree	disagree	fully agree	disagree	agree	fully disagree	fully agree	agree	agree	disagree	fully agree	agree
1.35483	woman	57	45 to 59 years	1	none	part time	< baccalaureate degree	alone	under 15.000 €	Workers		10 to 49 people	Industry	348	17	Standard duration (Less than 39h)	never	never	never	production or workshop	60	46 to 60 minutes	no	1 period	16	agree	fully agree	fully disagree	fully disagree	fully disagree	fully disagree	disagree	disagree	agree	fully agree	fully agree	fully agree	fully disagree	agree	fully agree	fully disagree	disagree	fully disagree	fully disagree	fully disagree	agree	fully disagree	agree	agree
1.22701	woman	30	25 to 34 years	2	none	full time	Baccalaureate degree	married/free union	15 to 24.000 €	Service and office worker		10 to 49 people	Industry	3	35	Standard duration (Less than 39h)	never	never	never	open space	20	16 to 30 minutes	no	>4	6	fully disagree	disagree	agree	agree	agree	fully agree	disagree	fully agree	agree	agree	agree	agree	agree	fully disagree	fully disagree	agree	fully disagree	agree	disagree	agree	agree	disagree	agree	agree
0.349331	man	29	25 to 34 years	2	none	full time	Bac + 3	married/free union	Over 36.000 €	Senior managers		500 people or more	Insurance and real estate	60	40	Long duration (39 to 50h)	never	never	never	open space	45	31 to 45 minutes	no	1 period	14	disagree	fully disagree	fully disagree	fully disagree	disagree	agree	disagree	fully agree	agree	fully agree	disagree	disagree	fully disagree	fully disagree	fully disagree	agree	disagree	agree	disagree	disagree	agree	fully disagree	fully agree	disagree
0.778848	man	50	45 to 59 years	5 and more	1	full time	Bac + 3	married/free union	Over 36.000 €	Senior managers		100 to 499 people	other services	180	40	Long duration (39 to 50h)	rarely	never	rarely	Individual office	20	16 to 30 minutes	no	never	11	disagree	disagree	agree	agree	disagree	fully agree	agree	disagree	agree	agree	disagree	disagree	agree	agree	disagree	disagree	fully disagree	agree	disagree	agree	fully agree	agree	disagree	disagree
1.0629	man	49	45 to 59 years	2	none	full time	< baccalaureate degree	married/free union	Over 36.000 €	Workers		10 to 49 people	other services	192	50	Long duration (39 to 50h)	rarely	rarely	Very often	at customers	60	46 to 60 minutes	no	1 period	14	agree	agree	disagree	agree	fully disagree	agree	disagree	disagree	agree	disagree	disagree	disagree	agree	fully disagree	disagree	fully agree	agree	agree	agree	agree	fully agree	disagree	agree	disagree
0.802195	man	39	35 to 44 years	4	2	full time	Bac + 3	married/free union	Over 36.000 €	Technician and associate professional		10 to 49 people	other services	96	40	Long duration (39 to 50h)	never	never	rarely	open space	40	31 to 45 minutes	no	never	16	disagree	fully agree	fully disagree	agree	disagree	agree	fully disagree	fully agree	fully agree	fully agree	agree	agree	agree	fully disagree	fully disagree	fully disagree	disagree	fully agree	fully agree	agree	disagree	disagree	agree	agree
1.26497	woman	52	45 to 59 years	3	2	part time	< baccalaureate degree	alone	under 15.000 €	Workers		50 to 99 people	other services	10	18	Standard duration (Less than 39h)	often	never	Very often	at customers	20	16 to 30 minutes	no	>4	38	fully agree	agree	fully disagree	fully disagree	disagree	fully disagree	fully agree	disagree	agree	fully agree	fully agree	agree	disagree	agree	agree	fully disagree	disagree	fully disagree	disagree	fully disagree	disagree	disagree	disagree	disagree
1.06929	woman	44	35 to 44 years	3	none	full time	Bac + 3	alone	15 to 24.000 €	Technician and associate professional		10 to 49 people	Education, health and social work	174	45	Long duration (39 to 50h)	often	never	never	other	5	<15 minutes	no	1 period	10	disagree	fully disagree	fully disagree	disagree	disagree	agree	fully disagree	disagree	agree	agree	agree	disagree	fully disagree	disagree	disagree	fully disagree	fully disagree	disagree	disagree	agree	disagree	agree	agree	disagree
1.14151	woman	40	35 to 44 years	4	2	part time	Baccalaureate degree	married/free union	Over 36.000 €	Service and office worker		100 to 499 people	Transports	242	35	Standard duration (Less than 39h)	Very often	Very often	Very often	Individual office	5	<15 minutes	no	never	16	agree	fully agree	fully agree	disagree	disagree	disagree	disagree	agree	agree	fully agree	disagree	agree	disagree	disagree	agree	disagree	fully disagree	disagree	fully agree	agree	disagree	disagree	fully agree	agree
1.73681	woman	34	25 to 34 years	4	2	full time	Baccalaureate degree	married/free union	24 to 36.000 €	Service and office worker		9 people or less	trading	26	38	Standard duration (Less than 39h)	never	never	never	Individual office	35	31 to 45 minutes	no	never	0	disagree	disagree	agree	disagree	disagree	agree	disagree	disagree	agree	agree	disagree	fully disagree	agree	disagree	fully disagree	agree	fully disagree	agree	disagree	agree	agree	agree	fully disagree	fully disagree
0.783203	man	55	45 to 59 years	2	none	full time	Bac + 2	married/free union		Technician and associate professional		500 people or more	other services	182	35	Standard duration (Less than 39h)	often	never	never	flex office	105	>1h30	no	>4	14	fully agree	fully agree	fully disagree	disagree	disagree	disagree	agree	agree	disagree	fully agree	agree	fully agree	disagree	agree	agree	fully disagree	disagree	disagree	agree	disagree	disagree	disagree	agree	agree
0.696898	man	49	45 to 59 years	4	1	part time	Baccalaureate degree	married/free union	Over 36.000 €	Service and office worker		50 to 99 people	other services	297	28	Standard duration (Less than 39h)	Very often	never	Very often	other	10	<15 minutes	no	never	14	disagree	fully agree	disagree	agree	disagree	agree	disagree	agree	agree	agree	fully agree	fully agree	agree	disagree	disagree	agree	disagree	agree	fully agree	agree	agree	disagree	disagree	disagree
0.806882	man	38	35 to 44 years	4	2	full time	Bac + 2	married/free union	24 to 36.000 €	Technician and associate professional		500 people or more	Education, health and social work	10	38	Standard duration (Less than 39h)	never	never	never	other	45	31 to 45 minutes	no	never	5	agree	agree	fully disagree	disagree	agree	agree	disagree	agree	agree	fully agree	disagree	agree	disagree	disagree	disagree	disagree	agree	disagree	fully agree	agree	agree	disagree	fully agree	disagree
0.639483	woman	54	45 to 59 years	3	1	self employed	Bac + 2	married/free union	Over 36.000 €		Senior managers		trading	96	35	Standard duration (Less than 39h)	rarely	never	never	at home	0	<15 minutes		2 to 4 periods	21	disagree	disagree		fully agree		agree		agree	agree	agree	agree	disagree	disagree	disagree	fully disagree		fully disagree	fully disagree	disagree	agree	agree		agree
0.386522	woman	49	45 to 59 years	3	1	full time	Baccalaureate degree	married/free union	24 to 36.000 €	Service and office worker		500 people or more	other services	6	35	Standard duration (Less than 39h)	never	never	often	open space	15	<15 minutes	no	>4	10	fully agree	agree	disagree	fully disagree	disagree	fully agree	fully disagree	fully agree	fully agree	fully agree	disagree	fully agree	agree	agree	disagree	agree	disagree	fully agree	agree	fully agree	disagree	fully disagree	disagree	fully disagree
1.00235	woman	49	45 to 59 years	3	1	full time	Bac + 3	En union libre	Over 36.000 €	Senior managers		10 to 49 people	Education, health and social work	306	40	Long duration (39 to 50h)	Very often	rarely	often	other	10	<15 minutes	no	never	10	disagree	disagree	disagree	agree	agree	agree	disagree	fully agree	agree	disagree	agree	disagree	agree	agree	disagree	agree	disagree	fully agree	disagree	agree	agree	fully disagree	agree	disagree
1.03237	woman	59	45 to 59 years	2	none	full time	< baccalaureate degree	married/free union	15 to 24.000 €	Service and office worker		10 to 49 people	trading	176	35	Standard duration (Less than 39h)	Very often	never	never	Commercial permises	20	16 to 30 minutes	no	never	10	fully agree	fully disagree	fully disagree	fully disagree	fully disagree	fully agree	fully disagree	fully disagree	fully agree	fully disagree	fully disagree	fully disagree	fully agree	fully disagree	fully agree	fully disagree	fully disagree	fully disagree	fully disagree	agree	fully agree	fully disagree	fully disagree	fully disagree
0.775767	man	50	45 to 59 years	4	2	full time	Baccalaureate degree	married/free union	24 to 36.000 €	Service and office worker		10 to 49 people	other services	2	40	Long duration (39 to 50h)	Very often	often	often	at customers	50	46 to 60 minutes	no	2 to 4 periods	33	disagree	agree	disagree	disagree	agree	agree	disagree	agree	agree	fully agree	disagree	fully agree	agree	disagree	disagree	disagree	agree	disagree	fully agree	agree	agree	agree	agree	disagree
0.991166	woman	46	45 to 59 years	4	none	full time	Bac + 3	alone		Service and office worker		10 to 49 people	other services	177	35	Standard duration (Less than 39h)	never	never	never	other	15	<15 minutes	no	1 period	13	fully agree	disagree	disagree	disagree	disagree	agree	fully disagree	fully disagree	agree	disagree	disagree	agree	agree	disagree	disagree	fully agree	fully disagree	fully agree	disagree	agree	disagree	agree	fully disagree	disagree
1.11663	man	54	45 to 59 years	4	2	part time	Bac + 3	married/free union	15 to 24.000 €	Senior managers		9 people or less	Education, health and social work	39	20	Standard duration (Less than 39h)	never	never	never	open space	25	16 to 30 minutes	no	2 to 4 periods	9	disagree	disagree	agree	agree	agree	agree	disagree	agree	agree	agree	disagree	fully disagree	agree	disagree	disagree	agree	disagree	agree	disagree	agree	agree	agree	agree	disagree
0.449435	woman	33	25 to 34 years	4	2	full time	Baccalaureate degree	married/free union	24 to 36.000 €	Service and office worker		500 people or more	other services	120	25	Standard duration (Less than 39h)	often	often	Very often	Individual office	600	>1h30	1 day per week	never	11	agree	agree	agree	fully agree	fully agree	agree	fully agree	agree	agree	fully agree	agree	fully agree	fully agree	agree	fully agree	agree	agree	agree	fully agree	agree	fully agree	agree	agree	agree
0.888819	man	42	35 to 44 years	5 and more	4 and more	full time	Baccalaureate degree	married/free union	24 to 36.000 €	Service and office worker		100 to 499 people	other services	128	36	Standard duration (Less than 39h)	never	never	never	open space	120	>1h30	no	2 to 4 periods	12	agree	agree	agree	fully disagree	disagree	agree	fully disagree	agree	agree	disagree	disagree	fully agree	agree	agree	disagree	fully agree	agree	fully agree	disagree	agree	disagree	agree	disagree	disagree
0.951839	woman	54	45 to 59 years	4	none	full time	Bac + 3	married/free union	Over 36.000 €	Senior managers		100 to 499 people	building	300	50	Long duration (39 to 50h)	often	never	often	open space	45	31 to 45 minutes	a half day per week	never	18	agree	disagree	disagree	disagree	agree	agree	agree	agree	agree	disagree	agree	agree	disagree	disagree	disagree	disagree	agree	agree	agree	disagree	agree	agree	disagree	disagree
1.01807	woman	39	35 to 44 years	4	2	full time	Baccalaureate degree	married/free union	24 to 36.000 €	Service and office worker		500 people or more	Education, health and social work	120	37	Standard duration (Less than 39h)	never	never	Very often	other	30	16 to 30 minutes	no	never	38	fully disagree	agree	fully disagree	fully disagree	fully disagree	disagree	fully disagree	disagree	agree	fully agree	disagree	agree	agree	disagree	fully disagree	fully agree	disagree	agree	agree	disagree	disagree	fully disagree	disagree	disagree
0.781216	man	51	45 to 59 years	3	1	full time	Baccalaureate degree	married/free union	15 to 24.000 €	Technician and associate professional		500 people or more	Education, health and social work	123	35	Standard duration (Less than 39h)	rarely	rarely	often	Individual office	15	<15 minutes	no	2 to 4 periods	9	disagree	agree	fully agree	agree	fully agree	fully agree	disagree	agree	agree	agree	disagree	agree	fully agree	disagree	fully disagree	agree	disagree	agree	fully agree	fully agree	fully agree	fully agree	fully agree	disagree
0.908675	woman	47	45 to 59 years	1	none	full time	Bac + 3	alone	15 to 24.000 €	Service and office worker		100 to 499 people	other services	9	60	Very Long duration (More than50h)	often	never	rarely	at home	90	1h to 1h30		>4	46	fully disagree	disagree	agree	disagree	agree	agree	fully disagree	agree	fully disagree	agree	fully agree	fully disagree	agree	disagree	disagree	agree	fully disagree	agree	disagree	agree	agree	disagree	agree	disagree
0.366819	man	36	35 to 44 years	2	none	full time	Bac + 2	alone	Over 36.000 €	Senior managers		500 people or more	Insurance and real estate	30	45	Long duration (39 to 50h)	Very often	never	never	open space	120	>1h30	no	never	40	fully agree	agree	agree	fully agree	agree	agree	fully agree	agree	agree	fully agree	fully agree	fully agree	agree	disagree	disagree	agree	fully agree	fully agree	fully agree	agree	fully agree	fully agree	agree	agree
0.826787	man	50	45 to 59 years	2	none	full time	< baccalaureate degree	alone	15 to 24.000 €	Service and office worker		50 to 99 people	trading	73	37	Standard duration (Less than 39h)	never	never	never	production or workshop	30	16 to 30 minutes	no	2 to 4 periods	0	agree	agree	agree	agree	agree	agree	agree	agree	agree	agree	agree	agree	agree	agree	agree	agree	agree	agree	agree	agree	agree	agree	agree	agree
0.297992	man	57	45 to 59 years	1	none	full time	< baccalaureate degree	alone	15 to 24.000 €	Service and office worker		500 people or more	other services	453	35	Standard duration (Less than 39h)	rarely	never	Very often	Individual office	12	<15 minutes	no	never	0	agree	agree	agree	disagree	disagree	agree	disagree	disagree	fully agree	disagree	disagree	disagree	disagree	disagree	agree	agree	fully disagree	agree	agree	agree	agree	agree	disagree	agree
0.781216	man	55	45 to 59 years	4	none	full time	Bac + 2	alone		Technician and associate professional		100 to 499 people	other services	74	40	Long duration (39 to 50h)	rarely	never	rarely	Individual office	60	46 to 60 minutes	no	never	8	disagree	agree	agree	disagree	agree	agree	disagree	agree	agree	agree	agree	fully disagree	agree	agree	disagree	disagree	agree	agree	disagree	disagree	agree	agree	disagree	agree
0.409696	man	47	45 to 59 years	3	none	full time	< baccalaureate degree	married/free union	15 to 24.000 €	Workers		500 people or more	Industry	306	35	Standard duration (Less than 39h)	rarely	never	Very often	production or workshop	30	16 to 30 minutes	no	never	22	fully disagree	agree	agree	agree	disagree	disagree	disagree	agree	agree	agree	agree	fully disagree	agree	disagree	agree	agree	fully disagree	agree	agree	agree	agree	agree	agree	agree
0.375841	woman	50	45 to 59 years	4	1	part time	Baccalaureate degree	married/free union	Over 36.000 €	Service and office worker		500 people or more	trading	106	28	Standard duration (Less than 39h)	never	never	never	open space	25	16 to 30 minutes	no	never	5	fully agree	agree	disagree	disagree	disagree	agree	agree	agree	agree	agree	agree	agree	disagree	agree	fully agree	disagree	disagree	disagree	agree	agree	disagree	disagree	agree	disagree
3.99885	woman	20	18 to 24 years	3	1	part time	Baccalaureate degree	married/free union	15 to 24.000 €	Service and office worker		9 people or less	trading	72	24	Standard duration (Less than 39h)	Very often	never	never	other	5	<15 minutes	no	>4	21	fully agree	fully agree	fully agree	fully disagree	fully agree	fully agree	fully disagree	agree	agree	fully agree	fully disagree	fully agree	fully disagree	fully agree	fully agree	agree	fully disagree	agree	fully agree	disagree	agree	agree	fully agree	disagree
0.782683	man	39	35 to 44 years	2	none	full time	Bac + 3	married/free union	Over 36.000 €	Senior managers		100 to 499 people	Transports	18	50	Long duration (39 to 50h)	rarely	rarely	rarely	open space	10	<15 minutes	no	1 period	12	fully disagree	disagree	agree	fully agree	agree	agree	disagree	fully agree	fully agree	agree	agree	disagree	fully agree	fully disagree	fully disagree	agree	fully disagree	fully agree	agree	agree	agree	agree	agree	disagree
1.4169	woman	54	45 to 59 years	2	none	full time	Baccalaureate degree	alone	15 to 24.000 €	Service and office worker		9 people or less	Insurance and real estate	240	35	Standard duration (Less than 39h)	rarely	never	never	Individual office	90	1h to 1h30	no	>4	9	fully disagree	agree	fully disagree	fully disagree	fully disagree	fully disagree	agree	fully agree	agree	agree	agree	fully agree	fully disagree	fully agree	fully agree	fully disagree	agree	fully disagree	fully agree	disagree	fully disagree	fully disagree	fully agree	disagree
0.949087	woman	55	45 to 59 years	4	2	full time	Bac + 2	married/free union		Senior managers		100 to 499 people	Transports	180	40	Long duration (39 to 50h)	never	never	never	Individual office	45	31 to 45 minutes	no	never	15	disagree	agree	disagree	agree	disagree	agree	fully disagree	agree	agree	disagree	disagree	disagree	agree	disagree	disagree	agree	disagree	agree	disagree	agree	agree	fully disagree	agree	fully disagree
1.01807	woman	42	35 to 44 years	4	2	full time	Baccalaureate degree	married/free union	Over 36.000 €	Service and office worker		500 people or more	other services	241	45	Long duration (39 to 50h)	Very often	Very often	Very often	Individual office	20	16 to 30 minutes	no	never	0	agree	agree	disagree	disagree	disagree	agree	disagree	agree	disagree	agree	agree	disagree	fully disagree	disagree	disagree	disagree	fully disagree	agree	agree	disagree	agree	agree	agree	disagree
0.297434	man	48	45 to 59 years	3	1	full time	Bac + 2	married/free union	24 to 36.000 €	Service and office worker		500 people or more	other services	266	40	Long duration (39 to 50h)	Very often	Very often	Very often	open space	5	<15 minutes	no	never	8	disagree	fully agree	disagree	disagree	agree	agree	fully disagree	disagree	agree	fully disagree	agree	agree	fully agree	disagree	disagree	agree	fully disagree	agree	fully agree	agree	agree	disagree	agree	disagree
0.476634	woman	35	35 to 44 years	3	1	full time	Bac + 3	married/free union	Over 36.000 €	Senior managers		500 people or more	Transports	136	35	Standard duration (Less than 39h)	never	never	never	open space	25	16 to 30 minutes	a half day per week	never	43	disagree	disagree	disagree	disagree	disagree	agree	agree	disagree	agree	agree	disagree	disagree	agree	disagree	disagree	agree	fully disagree	agree	disagree	disagree	agree	disagree	disagree	disagree
1.03237	woman	48	45 to 59 years	1	none	full time	< baccalaureate degree	alone		Service and office worker		10 to 49 people	other services	50	35	Standard duration (Less than 39h)	rarely	never	never	at customers	10	<15 minutes	no	never	11	fully disagree	fully disagree	fully agree	fully agree	fully agree	fully agree	fully disagree	fully disagree	fully agree	fully agree	fully disagree	fully disagree	fully agree	fully disagree	fully disagree	fully agree	disagree	fully agree	fully disagree	fully agree	fully agree	fully agree	disagree	disagree
0.908675	woman	52	45 to 59 years	2	none	full time	Bac + 3	married/free union	24 to 36.000 €	Service and office worker		100 to 499 people	trading	182	35	Standard duration (Less than 39h)	often	never	Very often	Individual office	10	<15 minutes	no	2 to 4 periods	12	agree	disagree	agree	disagree	agree	agree	fully disagree	disagree	fully agree	disagree	disagree	disagree	agree	disagree	disagree	agree	fully disagree	agree	disagree	agree	agree	agree	disagree	agree
1.57129	woman	36	35 to 44 years	4	2	full time	Bac + 2	married/free union	Over 36.000 €	Technician and associate professional		9 people or less	other services	144	39	Long duration (39 to 50h)	never	never	never	Individual office	30	16 to 30 minutes	no	never	0	disagree	agree	agree	agree	agree	agree	agree	agree	agree	disagree	agree	disagree	fully agree	disagree	fully disagree	agree	fully disagree	agree	agree	agree	agree	agree	agree	disagree
1.35625	woman	31	25 to 34 years	4	2	full time	Bac + 2	married/free union	under 15.000 €	Service and office worker		50 to 99 people	Education, health and social work	60	35	Standard duration (Less than 39h)	never	never	never	Individual office	45	31 to 45 minutes	no	never	8	disagree	agree	agree	fully agree	fully agree	fully agree	fully disagree	disagree	fully agree	fully agree	agree	disagree	fully agree	fully disagree	fully disagree	fully agree	disagree	fully agree	agree	fully agree	fully agree	agree	disagree	agree
0.790095	man	44	35 to 44 years	1	none	self employed	Bac + 2	alone	24 to 36.000 €		Technician and associate professional Service and office worker Workers	9 people or less	trading	174	40	Long duration (39 to 50h)	never	never	rarely	other	60	46 to 60 minutes	no	1 period	43	agree	agree		agree		agree		agree	agree	agree	agree	agree	disagree	agree	disagree		agree	agree	agree	agree	agree		agree
0.584497	woman	50	45 to 59 years	3	none	self employed	Bac + 3	alone	15 to 24.000 €		Technician and associate professional Service and office worker Workers	9 people or less	other services	180	60	Very Long duration (More than50h)	rarely	never	Very often	at home	0	<15 minutes		2 to 4 periods	42	disagree	agree		agree		agree		fully disagree	agree	fully agree	disagree	disagree	agree	fully disagree	disagree		fully disagree	agree	fully agree	disagree	agree		disagree
0.541286	woman	31	25 to 34 years	4	2	full time	Bac + 2	married/free union	Over 36.000 €	Technician and associate professional		500 people or more	Industry	132	35	Standard duration (Less than 39h)	Very often	never	never	other	120	>1h30	no	never	22	fully agree	fully agree	fully disagree	fully disagree	fully disagree	disagree	disagree	agree	agree	fully agree	agree	fully agree	disagree	disagree	agree	fully disagree	fully disagree	disagree	fully agree	disagree	agree	fully agree	fully agree	agree
0.783203	man	56	45 to 59 years	3	1	full time	Bac + 2	En union libre	Over 36.000 €	Technician and associate professional		10 to 49 people	Insurance and real estate	120	35	Standard duration (Less than 39h)	Very often	never	never	Commercial permises	10	<15 minutes	no	never	8	disagree	fully agree	agree	agree	agree	agree	fully disagree	agree	agree	disagree	disagree	disagree	fully agree	fully disagree	fully disagree	agree	fully disagree	agree	fully agree	agree	disagree	agree	agree	disagree
0.951645	woman	48	45 to 59 years	1	none	full time	Bac + 2	alone	24 to 36.000 €	Technician and associate professional		100 to 499 people	Insurance and real estate	316	38	Standard duration (Less than 39h)	never	never	never	Individual office	10	<15 minutes	no	never	29	fully disagree	disagree	disagree	agree	agree	agree	disagree	agree	fully agree	agree	disagree	fully disagree	agree	fully disagree	disagree	agree	fully disagree	agree	agree	agree	fully agree	disagree	fully agree	fully disagree
0.771008	man	51	45 to 59 years	3	none	full time	< baccalaureate degree	married/free union	15 to 24.000 €	Service and office worker		500 people or more	other services	240	40	Long duration (39 to 50h)	never	never	never	external site	120	>1h30	no	1 period	22	agree	fully disagree	agree	agree	agree	disagree	disagree	disagree	agree	agree	agree	disagree	agree	disagree	fully disagree	disagree	disagree	agree	fully disagree	agree	agree	agree	disagree	disagree
2.25503	woman	50	45 to 59 years	2	none	part time	Baccalaureate degree	married/free union	24 to 36.000 €	Workers		9 people or less	trading	41	20	Standard duration (Less than 39h)	never	never	never	Individual office	15	<15 minutes	no	never	1	fully agree	agree	agree	disagree	agree	agree	disagree	disagree	agree	agree	disagree	fully disagree	agree	agree	disagree	agree	agree	agree	disagree	agree	agree	agree	disagree	agree
1.02243	man	39	35 to 44 years	4	2	full time	Baccalaureate degree	married/free union		Workers		100 to 499 people	Industry	6	35	Standard duration (Less than 39h)	never	never	Very often	production or workshop	15	<15 minutes	no	never	12	disagree	agree	disagree	agree	agree	agree	fully disagree	agree	agree	disagree	disagree	disagree	agree	disagree	disagree	disagree	fully disagree	agree	agree	agree	agree	agree	disagree	agree
0.783203	man	57	45 to 59 years	2	none	full time	Baccalaureate degree	En union libre	under 15.000 €	Technician and associate professional		500 people or more	other services	60	41	Long duration (39 to 50h)	never	never	never	other	30	16 to 30 minutes	no	>4	3	fully agree	agree	fully disagree	fully disagree	fully disagree	agree	agree	fully disagree	agree	fully disagree	fully disagree	agree	fully disagree	fully disagree	fully agree	fully disagree	fully disagree	fully disagree	agree	fully disagree	agree	fully disagree	fully disagree	fully disagree
1.06929	woman	43	35 to 44 years	5 and more	2	full time	Bac + 3	married/free union	Over 36.000 €	Technician and associate professional		500 people or more	Education, health and social work	42	38	Standard duration (Less than 39h)	never	never	never	Individual office	10	<15 minutes	no	never	52	fully disagree	disagree	agree	agree	agree	agree	fully disagree	agree	agree	disagree	agree	fully disagree	fully agree	disagree	fully disagree	agree	fully disagree	agree	agree	agree	agree	disagree	disagree	disagree
0.958225	man	31	25 to 34 years	3	1	full time	Baccalaureate degree	married/free union	24 to 36.000 €	Service and office worker		10 to 49 people	other services	66	39	Long duration (39 to 50h)	rarely	never	never	production or workshop	5	<15 minutes	no	never	2	disagree	disagree	agree	agree	agree	agree	fully disagree	disagree	agree	disagree	agree	disagree	agree	disagree	disagree	disagree	fully disagree	agree	disagree	agree	agree	agree	agree	agree
0.964693	woman	48	45 to 59 years	4	1	full time	< baccalaureate degree	married/free union	Over 36.000 €	Service and office worker		500 people or more	Education, health and social work	342	40	Long duration (39 to 50h)	never	never	never	other	10	<15 minutes	no	never	2	agree	agree	agree	agree	agree	agree	disagree	disagree	agree	disagree	agree	agree	disagree	agree	disagree	agree	agree	agree	disagree	agree	agree	agree	fully agree	fully agree
0.848473	man	51	45 to 59 years	1	none	full time	Bac + 2	alone	24 to 36.000 €	Technician and associate professional		100 to 499 people	trading	152	39	Long duration (39 to 50h)	Very often	rarely	rarely	other	40	31 to 45 minutes	no	2 to 4 periods	9	agree	agree	disagree	disagree	disagree	agree	fully disagree	agree	agree	fully disagree	agree	disagree	agree	fully agree	agree	disagree	fully disagree	agree	disagree	agree	disagree	disagree	agree	agree
0.773111	man	49	45 to 59 years	3	none	full time	< baccalaureate degree	married/free union		Service and office worker		50 to 99 people	other services	314	35	Standard duration (Less than 39h)	never	never	rarely	external site	20	16 to 30 minutes	no	1 period	4	agree	disagree	disagree	agree	agree	agree	fully disagree	disagree	agree	disagree	disagree	agree	agree	disagree	agree	agree	fully disagree	agree	agree	agree	agree	agree	agree	disagree
0.956699	man	55	45 to 59 years	3	none	full time	< baccalaureate degree	married/free union	15 to 24.000 €	Workers		50 to 99 people	trading	2	36	Standard duration (Less than 39h)	Very often	never	Very often	Commercial permises	60	46 to 60 minutes	no	2 to 4 periods	20	disagree	disagree	disagree	disagree	disagree	agree	disagree	disagree	agree	disagree	disagree	fully disagree	disagree	fully agree	agree	agree	agree	disagree	disagree	agree	agree	disagree	disagree	fully disagree
0.82679	man	44	35 to 44 years	3	1	full time	Bac + 3	married/free union	Over 36.000 €	Senior managers		50 to 99 people	other services	120	50	Long duration (39 to 50h)	rarely	never	rarely	Individual office	25	16 to 30 minutes	no	1 period	19	fully disagree	agree	agree	fully agree	disagree	agree	disagree	fully agree	agree	fully disagree	agree	disagree	fully agree	agree	fully disagree	fully agree	disagree	agree	disagree	fully agree	agree	agree	fully agree	agree
0.865138	man	26	25 to 34 years	2	none	part time	Bac + 3	alone	15 to 24.000 €	Service and office worker		50 to 99 people	other services	10	20	Standard duration (Less than 39h)	rarely	never	rarely	at home	100	>1h30		never	11	agree	agree	disagree	agree	disagree	agree	agree	disagree	agree	disagree	disagree	disagree	agree	agree	agree	disagree	agree	agree	disagree	agree	disagree	disagree	agree	agree
0.801518	man	58	45 to 59 years	1	none	full time	Bac + 2	alone	15 to 24.000 €	Service and office worker		10 to 49 people	trading	219	45	Long duration (39 to 50h)	rarely	never	never	Commercial permises	70	1h to 1h30	no	1 period	14	disagree	agree	fully disagree	disagree	disagree	agree	disagree	agree	disagree	agree	disagree	fully disagree	agree	agree	fully disagree	disagree	fully disagree	agree	disagree	agree	agree	fully disagree	disagree	disagree
0.729472	man	59	45 to 59 years	3	none	full time	Bac + 2	married/free union		Senior managers		50 to 99 people	Industry	426	50	Long duration (39 to 50h)	rarely	never	often	open space	70	1h to 1h30	1 day per week	2 to 4 periods	10	disagree	agree	disagree	agree	disagree	agree	disagree	agree	disagree	agree	agree	agree	disagree	disagree	disagree	disagree	disagree	agree	agree	disagree	agree	disagree	agree	agree
0.893426	man	54	45 to 59 years	4	none	full time	Bac + 3	married/free union	Over 36.000 €	Senior managers		50 to 99 people	Education, health and social work	450	35	Standard duration (Less than 39h)	often	never	never	other	35	31 to 45 minutes	no	never	12	fully disagree	agree	fully agree	agree	disagree	agree	fully disagree	fully agree	agree	fully agree	agree	agree	fully agree	disagree	disagree	agree	disagree	agree	fully agree	agree	agree	disagree	agree	disagree
1.15235	woman	53	45 to 59 years	3	none	full time	Bac + 3	En union libre		Technician and associate professional		500 people or more	Education, health and social work	384	35	Standard duration (Less than 39h)	never	never	never	flex office	150	>1h30	no	never	47	agree	agree	disagree	disagree	disagree	disagree	agree	agree	disagree	agree	fully agree	agree	disagree	fully disagree	agree	disagree	agree	disagree	disagree	fully disagree	disagree	fully disagree	disagree	fully agree
0.478279	woman	42	35 to 44 years	4	2	full time	Bac + 3	married/free union	Over 36.000 €	Technician and associate professional		500 people or more	Education, health and social work	90	36	Standard duration (Less than 39h)	often	never	Very often	other	80	1h to 1h30	no	never	0	agree	agree	agree	agree	agree	agree	agree	agree	agree	agree	agree	disagree	agree	agree	disagree	agree	agree	agree	agree	agree	agree	agree	agree	disagree
1.60161	woman	46	45 to 59 years	3	1	full time	Bac + 2	married/free union	Over 36.000 €	Workers		10 to 49 people	other services	260	35	Standard duration (Less than 39h)	Very often	never	never	production or workshop	5	<15 minutes	no	1 period	80	agree	fully agree	fully disagree	fully disagree	fully disagree	fully disagree	fully disagree	fully agree	fully disagree	fully disagree	fully agree	fully agree	fully disagree	fully disagree	fully agree	fully disagree	fully disagree	fully disagree	fully agree	fully disagree	disagree	fully disagree	fully agree	fully agree
0.731789	man	49	45 to 59 years	2	none	full time	Bac + 2	married/free union	24 to 36.000 €	Service and office worker		100 to 499 people	Industry	288	37	Standard duration (Less than 39h)	never	never	rarely	open space	60	46 to 60 minutes	no	1 period	37	disagree	agree	disagree	agree	disagree	disagree	disagree	fully agree	agree	agree	agree	agree	agree	agree	agree	disagree	disagree	disagree	agree	agree	disagree	fully disagree	agree	fully agree
0.938449	woman	46	45 to 59 years	4	2	part time	Bac + 3	married/free union	15 to 24.000 €	Service and office worker		100 to 499 people	other services	96	8	Standard duration (Less than 39h)	never	never	rarely	at customers	15	<15 minutes	no	2 to 4 periods	12	agree	disagree	agree	agree	agree	agree	disagree	agree	agree	agree	agree	fully disagree	agree	disagree	disagree	agree	fully disagree	agree	agree	agree	agree	agree	disagree	disagree
1.07639	woman	53	45 to 59 years	4	1	full time	< baccalaureate degree	married/free union		Service and office worker		100 to 499 people	other services	6	37	Standard duration (Less than 39h)	never	never	never	open space	45	31 to 45 minutes	no	2 to 4 periods	18	disagree	agree	fully disagree	agree	disagree	agree	fully disagree	agree	agree	agree	agree	fully disagree	agree	fully agree	fully agree	agree	disagree	disagree	agree	fully agree	agree	fully disagree	disagree	disagree
0.411308	woman	60	60 years and more	3	none	full time	Bac + 3	married/free union	Over 36.000 €	Senior managers		500 people or more	Insurance and real estate	11	50	Long duration (39 to 50h)	often	never	never	open space	100	>1h30	no	1 period	8	disagree	disagree	disagree	disagree	agree	agree	fully disagree	disagree	fully agree	disagree	disagree	fully disagree	disagree	fully disagree	fully disagree	agree	agree	agree	fully disagree	disagree	agree	fully disagree	disagree	disagree
0.362558	man	32	25 to 34 years	3	1	full time	Bac + 3	married/free union	Over 36.000 €	Senior managers		500 people or more	Industry	117	40	Long duration (39 to 50h)	never	never	never	open space	10	<15 minutes	no	1 period	6	agree	agree	disagree	disagree	agree	agree	disagree	disagree	agree	disagree	disagree	fully disagree	agree	fully agree	fully disagree	agree	agree	agree	agree	agree	agree	agree	fully agree	disagree
0.300209	man	53	45 to 59 years	4	none	full time	Bac + 2	married/free union	Over 36.000 €	Senior managers		500 people or more	Industry	216	50	Long duration (39 to 50h)	rarely	rarely	often	Individual office	30	16 to 30 minutes	no	never	14	fully disagree	agree	agree	fully agree	fully agree	fully agree	fully disagree	fully agree	agree	disagree	disagree	disagree	fully agree	fully disagree	disagree	agree	disagree	fully agree	agree	agree	fully agree	fully agree	agree	disagree
1.1243	woman	32	25 to 34 years	2	none	full time	Baccalaureate degree	En union libre	24 to 36.000 €	Service and office worker		100 to 499 people	trading	98	37	Standard duration (Less than 39h)	rarely	never	rarely	Individual office	15	<15 minutes	no	never	23	disagree	disagree	disagree	disagree	fully disagree	agree	disagree	disagree	agree	agree	disagree	fully disagree	agree	agree	agree	disagree	fully disagree	disagree	agree	agree	agree	disagree	disagree	disagree
0.783203	man	58	45 to 59 years	2	none	full time	< baccalaureate degree	married/free union	Over 36.000 €	Technician and associate professional		500 people or more	other services	482	35	Standard duration (Less than 39h)	never	never	never	open space	20	16 to 30 minutes	no	never	10	fully disagree	agree	agree	agree	agree	agree	fully disagree	agree	agree	fully disagree	disagree	fully disagree	agree	disagree	fully disagree	agree	fully disagree	agree	disagree	agree	agree	disagree	agree	fully disagree
0.346488	man	28	25 to 34 years	3	1	full time	Baccalaureate degree	alone	15 to 24.000 €	Service and office worker		500 people or more	other services	6	35	Standard duration (Less than 39h)	often	never	often	at customers	60	46 to 60 minutes	no	>4	16	fully disagree	agree	disagree	disagree	disagree	agree	fully disagree	agree	fully agree	fully agree	fully agree	disagree	agree	agree	agree	agree	fully agree	fully agree	disagree	fully agree	fully disagree	fully agree	agree	fully disagree
1.09833	woman	29	25 to 34 years	2	none	full time	Bac + 3	En union libre	Over 36.000 €	Senior managers		100 to 499 people	Industry	48	45	Long duration (39 to 50h)	never	never	never	open space	20	16 to 30 minutes	no	never	14	disagree	disagree	fully disagree	agree	agree	fully agree	fully disagree	agree	disagree	fully agree	agree	disagree	disagree	disagree	disagree	disagree	fully disagree	agree	agree	agree	agree	disagree	agree	disagree
0.994262	woman	45	45 to 59 years	3	1	full time	Bac + 2	married/free union	24 to 36.000 €	Service and office worker		500 people or more	Education, health and social work	181	39	Long duration (39 to 50h)	never	never	never	open space	35	31 to 45 minutes	no	2 to 4 periods	9	fully disagree	fully agree	agree	agree	agree	agree	disagree	agree	agree	agree	agree	agree	agree	disagree	disagree	fully agree	fully disagree	agree	agree	agree	agree	agree	agree	agree
1.10341	man	52	45 to 59 years	5 and more	1	full time	< baccalaureate degree	alone	15 to 24.000 €	Service and office worker		9 people or less	building	155	38	Standard duration (Less than 39h)	never	never	never	Individual office	15	<15 minutes	no	>4	35	fully disagree	agree	agree	disagree	disagree	fully agree	fully disagree	agree	fully agree	agree	fully disagree	fully disagree	agree	agree	disagree	fully agree	fully disagree	disagree	agree	fully agree	fully agree	fully disagree	agree	fully disagree
0.972964	woman	58	45 to 59 years	3	1	full time	Bac + 3	En union libre	Over 36.000 €	Technician and associate professional		500 people or more	Education, health and social work	360	32	Standard duration (Less than 39h)	Very often	Very often	rarely	open space	15	<15 minutes	no	never	2	disagree	agree	fully disagree	disagree	disagree	agree	fully disagree	agree	agree	disagree	agree	agree	disagree	disagree	agree	fully disagree	disagree	disagree	fully agree	agree	disagree	disagree	disagree	agree
0.845631	man	32	25 to 34 years	4	2	full time	< baccalaureate degree	married/free union	15 to 24.000 €	Service and office worker		100 to 499 people	trading	41	37	Standard duration (Less than 39h)	often	often	rarely	external site	185	>1h30	a half day per week	never	15	agree	agree	fully agree	disagree	agree	disagree	disagree	agree	disagree	disagree	fully agree	disagree	agree	agree	agree	disagree	agree	disagree	fully agree	agree	disagree	agree	fully agree	agree
0.996703	woman	51	45 to 59 years	2	none	full time	Baccalaureate degree	alone	15 to 24.000 €	Service and office worker		10 to 49 people	other services	2	42	Long duration (39 to 50h)	never	never	never	Individual office	30	16 to 30 minutes	no	>4	4	disagree	disagree	agree	agree	disagree	agree	disagree	agree	agree	disagree	disagree	fully disagree	disagree	agree	disagree	disagree	disagree	agree	agree	agree	agree	agree	agree	disagree
1.10855	man	47	45 to 59 years	4	2	full time	< baccalaureate degree	En union libre	24 to 36.000 €	Service and office worker		9 people or less	trading	66	35	Standard duration (Less than 39h)	never	never	never	open space	25	16 to 30 minutes	no	1 period	8	agree	agree	disagree	agree	agree	agree	fully disagree	agree	agree	disagree	agree	disagree	agree	agree	disagree	agree	agree	agree	disagree	agree	agree	disagree	disagree	disagree
1.20036	woman	33	25 to 34 years	2	none	full time	Bac + 3	En union libre		Technician and associate professional		500 people or more	other services	63	35	Standard duration (Less than 39h)	never	never	rarely	Individual office	50	46 to 60 minutes	no	1 period	58	agree	agree	agree	agree	disagree	disagree	agree	disagree	disagree	disagree	disagree	agree	agree	disagree	agree	disagree	fully disagree	agree	fully disagree	disagree	fully agree	disagree	disagree	agree
0.545077	woman	39	35 to 44 years	4	2	full time	< baccalaureate degree	En union libre	24 to 36.000 €	Workers		500 people or more	Industry	216	35	Standard duration (Less than 39h)	rarely	never	Very often	production or workshop	7	<15 minutes	no	never	19	fully agree	fully agree	fully disagree	fully disagree	fully disagree	agree	fully disagree	fully disagree	fully agree	fully disagree	agree	fully disagree	agree	fully disagree	agree	disagree	fully disagree	agree	agree	disagree	fully disagree	fully disagree	fully disagree	fully agree
0.34478	man	55	45 to 59 years	3	1	full time	Bac + 3	married/free union	Over 36.000 €	Senior managers		500 people or more	Transports	26	35	Standard duration (Less than 39h)	never	never	never	Individual office	20	16 to 30 minutes	more than one day a week	never	8	fully disagree	disagree	fully agree	agree	fully agree	fully agree	fully disagree	fully agree	fully agree	agree	fully disagree	fully disagree	fully agree	fully disagree	fully disagree	fully agree	disagree	fully agree	fully agree	fully agree	fully agree	fully agree	fully agree	fully disagree
[truncated: 2,151 more rows]
[truncated: 31 more columns]
